# Supplementary material for: Viral miRNA adaptor differentially recruits miRNAs to target mRNAs through alternative base-pairing
Source: eLife. 2019 Sep 20;8:e50530. doi: 10.7554/eLife.50530 (PMC6763288; doi:10.7554/eLife.50530)
Supplement: Figure 1—figure supplement 1—source data 1. [file elife-50530-fig1-figsupp1-data1.xlsx]

## Sheet: Sheet1
Experiment_1
Gene	Treatment	Ct-1	Ct-2	Ct-3	Mean Ct	DCt-1	DCt-2	DCt-3	Mean DCt	Fold Change-1	Fold Change-2	Fold Change-3	Mean Fold Change	Std. Dev.
18S	aGFP	21.2	21.24	21.23	21.2233
18S	aHSUR-2	21.46	21.49	21.45	21.4667
HSUR2 Targets
NGDN	aGFP	22.56	22.34	22.47		1.33667	1.11667	1.24667	1.23333	0.93088	1.08423	0.990801	1.00197	0.0772812
NGDN	aHSUR-2	22.05	22	22.02		0.583333	0.533333	0.553333	0.556667	1.56917	1.6245	1.60214	1.5986	0.0278372
RB1	aGFP	21.83	21.75	21.83		0.606667	0.526667	0.606667	0.58	0.981686	1.03766	0.981686	1.00034	0.0323165
RB1	aHSUR-2	20.98	20.96	20.98		-0.486667	-0.506667	-0.486667	-0.493333	2.09459	2.12383	2.09459	2.10433	0.0168814
YTHDC1	aGFP	22.36	22.44	22.37		1.13667	1.21667	1.14667	1.16667	1.02101	0.965936	1.01396	1.0003	0.0299703
YTHDC1	aHSUR-2	21.67	21.65	21.67		0.203333	0.183333	0.203333	0.196667	1.94981	1.97703	1.94981	1.95888	0.0157145
TP53RK	aGFP	24.87	24.85	24.88		3.64667	3.62667	3.65667	3.64333	0.997692	1.01162	0.990801	1.00004	0.0106057
TP53RK	aHSUR-2	24.37	24.34	24.44		2.90333	2.87333	2.97333	2.91667	1.67018	1.70527	1.59107	1.65551	0.0584947
PACS1_3	aGFP	22.01	22	21.93		0.786667	0.776667	0.706667	0.756667	0.97942	0.986233	1.03526	1.00031	0.0304663
PACS1_3	aHSUR-2	20.85	20.87	20.83		-0.616667	-0.596667	-0.636667	-0.616667	2.59068	2.55502	2.62685	2.59085	0.035916
HNRNPA2B1_1	aGFP	18.51	18.48	18.48		-2.71333	-2.74333	-2.74333	-2.73333	0.986233	1.00696	1.00696	1.00005	0.0119643
HNRNPA2B1_1	aHSUR-2	17.76	17.75	17.75		-3.70667	-3.71667	-3.71667	-3.71333	1.96337	1.97703	1.97703	1.97248	0.00788449
STK4	aGFP	21.78	21.77	21.73		0.556667	0.546667	0.506667	0.536667	0.986233	0.993092	1.02101	1.00011	0.0184218
STK4	aHSUR-2	21.37	21.33	21.43		-0.0966667	-0.136667	-0.0366667	-0.09	1.55114	1.59475	1.48796	1.54462	0.0536962
CD69_2	aGFP	20.54	20.52	20.53		-0.683333	-0.703333	-0.693333	-0.693333	0.993092	1.00696	1	1.00002	0.00693154
CD69_2	aHSUR-2	19.37	19.46	19.46		-2.09667	-2.00667	-2.00667	-2.03667	2.64512	2.48515	2.48515	2.53847	0.0923585
MGA_7	aGFP	21.55	21.55	21.52		0.326667	0.326667	0.296667	0.316667	0.993092	0.993092	1.01396	1.00005	0.0120476
MGA_7	aHSUR-2	20.65	20.59	20.6		-0.816667	-0.876667	-0.866667	-0.853333	2.19365	2.2868	2.27101	2.25049	0.0498527
BCCIP	aGFP	19.83	19.78	19.79		-1.39333	-1.44333	-1.43333	-1.42333	0.97942	1.01396	1.00696	1.00011	0.0182583
BCCIP	aHSUR-2	19.9	19.91	19.95		-1.56667	-1.55667	-1.51667	-1.54667	1.10445	1.09682	1.06683	1.08937	0.0198879
b-actin	aGFP	26.51	26.52	26.47		5.28667	5.29667	5.24667	5.27667	0.993092	0.986233	1.02101	1.00011	0.0184218
b-actin	aHSUR-2	26.48	26.53	26.34		5.01333	5.06333	4.87333	4.98333	1.20025	1.15936	1.32256	1.22739	0.0849164
Experiment_2
Gene	Treatment	Ct-1	Ct-2	Ct-3	Mean Ct	DCt-1	DCt-2	DCt-3	Mean DCt	Fold Change-1	Fold Change-2	Fold Change-3	Mean Fold Change	Std. Dev.
18S	aGFP	21.02	21.15	21.16	21.11
18S	aHSUR-2	21.43	21.7	21.92	21.6833
HSUR2 Targets
NGDN	aGFP	22.22	22.22	22.22		1.11	1.11	1.11	1.11	1	1	1	1	0
NGDN	aHSUR-2	21.86	21.88	22.02		0.176667	0.196667	0.336667	0.236667	1.90968	1.88339	1.70921	1.8341	0.108947
RB1	aGFP	21.72	21.72	21.65		0.61	0.61	0.54	0.586667	0.983957	0.983957	1.03288	1.00026	0.0282434
RB1	aHSUR-2	20.87	20.91	20.89		-0.813333	-0.773333	-0.793333	-0.793333	2.63902	2.56685	2.60268	2.60285	0.0360823
YTHDC1	aGFP	22.2	22.23	22.24		1.09	1.12	1.13	1.11333	1.0163	0.99539	0.988514	1.00007	0.0144744
YTHDC1	aHSUR-2	21.47	21.49	21.54		-0.213333	-0.193333	-0.143333	-0.183333	2.50822	2.47369	2.38943	2.45712	0.0611076
TP53RK	aGFP	24.8	24.83	24.82		3.69	3.72	3.71	3.70667	1.01162	0.990801	0.997692	1.00004	0.0106057
TP53RK	aHSUR-2	24.32	24.25	24.34		2.63667	2.56667	2.65667	2.62	2.09943	2.20381	2.07053	2.12459	0.0701113
PACS1_3	aGFP	21.96	21.96	21.97		0.85	0.85	0.86	0.853333	1.00231	1.00231	0.99539	1.00001	0.00399727
PACS1_3	aHSUR-2	20.82	20.8	20.82		-0.863333	-0.883333	-0.863333	-0.87	3.28676	3.33264	3.28676	3.30206	0.0264897
HNRNPA2B1_1	aGFP	18.33	18.33	18.35		-2.78	-2.78	-2.76	-2.77333	1.00463	1.00463	0.990801	1.00002	0.00798537
HNRNPA2B1_1	aHSUR-2	17.69	17.73	17.69		-3.99333	-3.95333	-3.99333	-3.98	2.32947	2.26577	2.32947	2.30823	0.0367769
STK4	aGFP	21.76	21.77	21.74		0.65	0.66	0.63	0.646667	0.997692	0.990801	1.01162	1.00004	0.0106057
STK4	aHSUR-2	21.44	21.34	21.44		-0.243333	-0.343333	-0.243333	-0.276667	1.85318	1.98618	1.85318	1.89751	0.0767927
CD69_2	aGFP	20.47	20.54	20.48		-0.64	-0.57	-0.63	-0.613333	1.01866	0.97041	1.01162	1.00023	0.0260619
CD69_2	aHSUR-2	19.91	19.96	19.83		-1.77333	-1.72333	-1.85333	-1.78333	2.23457	2.15846	2.36199	2.25167	0.102836
MGA_7	aGFP	21.43	21.54	21.52		0.32	0.43	0.41	0.386667	1.04729	0.97041	0.983957	1.00055	0.0410412
MGA_7	aHSUR-2	20.94	20.92	20.97		-0.743333	-0.763333	-0.713333	-0.74	2.18859	2.21914	2.14355	2.18376	0.0380267
BCCIP	aGFP	19.47	19.48	19.48		-1.64	-1.63	-1.63	-1.63333	1.00463	0.997692	0.997692	1.00001	0.00400652
BCCIP	aHSUR-2	19.84	19.82	19.85		-1.84333	-1.86333	-1.83333	-1.84667	1.15669	1.17283	1.1487	1.15941	0.0122959
b-actin	aGFP	25.56	25.36	25.49		4.45	4.25	4.38	4.36	0.939523	1.07923	0.986233	1.00166	0.0711192
b-actin	aHSUR-2	26.31	26.3	26.32		4.62667	4.61667	4.63667	4.62667	0.831238	0.83702	0.825496	0.831251	0.00576176
Experiment_3
Gene	Treatment	Ct-1	Ct-2	Ct-3	Mean Ct	DCt-1	DCt-2	DCt-3	Mean DCt	Fold Change-1	Fold Change-2	Fold Change-3	Mean Fold Change	Std. Dev.
18S	aGFP	20.87	20.81	20.92	20.8667
18S	aHSUR-2	21.18	21.16	21.29	21.21
HSUR2 Targets
NGDN	aGFP	22.07	22.1	22.07		1.20333	1.23333	1.20333	1.21333	1.00696	0.986233	1.00696	1.00005	0.0119643
NGDN	aHSUR-2	21.61	21.58	21.63		0.4	0.37	0.42	0.396667	1.75727	1.79419	1.73307	1.76151	0.0307786
RB1	aGFP	21.27	21.43	21.35		0.403333	0.563333	0.483333	0.483333	1.05702	0.946058	1	1.00103	0.0554873
RB1	aHSUR-2	20.31	20.31	20.28		-0.9	-0.9	-0.93	-0.91	2.6087	2.6087	2.66352	2.62698	0.0316471
YTHDC1	aGFP	22.04	22.07	22.04		1.17333	1.20333	1.17333	1.18333	1.00696	0.986233	1.00696	1.00005	0.0119643
YTHDC1	aHSUR-2	21.12	21.07	21.13		-0.09	-0.14	-0.08	-0.103333	2.41719	2.50244	2.4005	2.44004	0.0546756
TP53RK	aGFP	24.66	24.78	24.7		3.79333	3.91333	3.83333	3.84667	1.03766	0.954842	1.00928	1.0006	0.0420873
TP53RK	aHSUR-2	23.98	23.91	24.01		2.77	2.7	2.8	2.75667	2.10916	2.21402	2.06575	2.12964	0.0762262
PACS1_3	aGFP	21.46	21.47	21.46		0.593333	0.603333	0.593333	0.596667	1.00231	0.99539	1.00231	1.00001	0.00399727
PACS1_3	aHSUR-2	20.07	20.08	20.1		-1.14	-1.13	-1.11	-1.12667	3.33264	3.30962	3.26406	3.30211	0.0349045
HNRNPA2B1_1	aGFP	18.01	18.02	18		-2.85667	-2.84667	-2.86667	-2.85667	1	0.993092	1.00696	1.00002	0.00693154
HNRNPA2B1_1	aHSUR-2	17.09	17.09	17.08		-4.12	-4.12	-4.13	-4.12333	2.4005	2.4005	2.41719	2.40606	0.00963989
STK4	aGFP	21.57	21.59	21.62		0.703333	0.723333	0.753333	0.726667	1.0163	1.00231	0.981686	1.0001	0.0174152
STK4	aHSUR-2	20.77	20.78	20.85		-0.44	-0.43	-0.36	-0.41	2.24492	2.22942	2.12383	2.19939	0.0658964
CD69_2	aGFP	20.57	20.58	20.59		-0.296667	-0.286667	-0.276667	-0.286667	1.00696	1	0.993092	1.00002	0.00693154
CD69_2	aHSUR-2	19.66	19.68	19.71		-1.55	-1.53	-1.5	-1.52667	2.4005	2.36745	2.31873	2.36222	0.0411345
MGA_7	aGFP	21.51	21.55	21.54		0.643333	0.683333	0.673333	0.666667	1.0163	0.988514	0.99539	1.00007	0.0144744
MGA_7	aHSUR-2	20.67	20.65	20.71		-0.54	-0.56	-0.5	-0.533333	2.30804	2.34026	2.24492	2.29774	0.0484934
BCCIP	aGFP	19.7	19.75	19.77		-1.16667	-1.11667	-1.09667	-1.12667	1.02811	0.993092	0.97942	1.00021	0.0251147
BCCIP	aHSUR-2	19.92	19.93	19.9		-1.29	-1.28	-1.31	-1.29333	1.11987	1.11214	1.1355	1.1225	0.0119045
b-actin	aGFP	26.01	25.95	25.91		5.14333	5.08333	5.04333	5.09	0.963707	1.00463	1.03288	1.0004	0.0347775
b-actin	aHSUR-2	25.87	25.69	25.78		4.66	4.48	4.57	4.57	1.34723	1.52626	1.43396	1.43582	0.0895273
