# Supplementary material for: Viral miRNA adaptor differentially recruits miRNAs to target mRNAs through alternative base-pairing
Source: eLife. 2019 Sep 20;8:e50530. doi: 10.7554/eLife.50530 (PMC6763288; doi:10.7554/eLife.50530)
Supplement: Figure 2—figure supplement 1—source data 1. [file elife-50530-fig2-figsupp1-data1.xlsx]

## Sheet: Sheet1
Gene	Gene.name	Binding site location	HSUR2 binding site on target mRNA	mRNA binding site on HSUR2	Length of 3'UTR to polyA	Distance of HSUR2 binding site to stop codon	Ratio	Periodicity	Length of 3'UTR	Ratio (stop codon)
ENSCJAG00000007908	HNRNPA2B1_1	3'UTR	UGGCAGAAGACACCAGAGCAGAUGCAG	CUGAUAAUGCUGCUUUAAUCACACACGAGGUAUCGCUUCUACUA	508	140	0.275591	1	2424	0.0577558
ENSCJAG00000007908	HNRNPA2B1_2	3'UTR	GUAGAAGCAUUCCUUCUUUGAUAAUGUUAAAUUUGUAAGUUUCAGGUGACAUGUGAAA	GUUUAUUUAUACCUGAUAAUGCUGCUUUAAUCACACACGAGGUAUCGCUUCUAC	508	308	0.606299	10.4534	2424	0.127063
ENSCJAG00000007908	HNRNPA2B1_3	3'UTR	UUAGCCAGGAUCAUGGUGUAAUAAGACA	UGUUUAUUUAUACCUGAUAAUGCUGC	508	403	0.793307	13.6777	2424	0.166254
ENSCJAG00000000590	NIT2_2	3'UTR	AUGAUUCUGCAGCAUAAUCAA	CUGAUAAUGCUGCUUUAAUCAC	72	37	0.513889	1	361	0.102493
ENSCJAG00000014087	H3F3B	3'UTR	GUGAAGGCAGUUUUUAU	GAUAAUGCUGCUUUAAUCAC	331	1	0.00302115	1	884	0.00113122
ENSCJAG00000015116	ZFP36L1	3'UTR	AAGUGGGGAGGAAGGGGAAGCUAGAUGGACUAUGAGA	UUUAUUGUUUAUUUAUACCUGAUAAUGCUGCUU	208	87	0.418269	1	208	0.418269
ENSCJAG00000017580	STK4_5	3'UTR	AGGAAUGUGCGCCAGUGG	ACACGAGGUAUCGCUUCUA	371	122	0.328841	1	438	0.278539
ENSCJAG00000002931	ZNF330_1	3'UTR	GGGUAGAGCGUAGCAUUUUUAUGG	ACCUGAUAAUGCUGCUUUAAUCA	694	138	0.198847	1	704	0.196023
ENSCJAG00000007297	DDIT4_2	3'UTR	GGGGUGGAGACUUUUGGGCAG	CUGCUUUAAUCACACACGAGGUAUCGCUUC	825	56	0.0678788	1	844	0.0663507
ENSCJAG00000019025	RNF145_1	3'UTR	AUGGGACAGAUCAAUCUCA	CGAGGUAUCGCUUCUAC	1237	411	0.332255	1.21705	1252	0.328275
ENSCJAG00000019025	RNF145_2	3'UTR	GUGAGGAUAAAGAGCGUGAGG	CCUGAUAAUGCUGCUUUAAUCAC	1237	342	0.276475	1.01273	1252	0.273163
ENSCJAG00000015157	ENSCJAG00000015157	3'UTR	AGUGACCUGGAUCCCGUGUGUGAUGCGGUCUCUUAUC	GAUAAUGCUGCUUUAAUCACACACGAGGUAUCGCUUCUACU	412	130	0.315534	1	429	0.30303
ENSCJAG00000019436	ZNF638_2	3'UTR	UGUUUAGGGUCCAGUUGAUUUGUGUA	UAUACCUGAUAAUGCUGCUUUAAUCA	232	35	0.150862	1	250	0.14
ENSCJAG00000001648	PACS1	3'UTR	CUGAGAUGUCGUGUGUGU	CACACACGAGGUAUCGC	1400	711	0.507857	1	1417	0.501764
ENSCJAG00000019636	PRDX3	3'UTR	UGCUUUUAUCAUUUUAAAGAUAGUUAUUUGUAGA	ACUACAUAUUUAUUGUUUAUUUAUACCUGAUAAUGCU	729	54	0.0740741	1	767	0.0704042
ENSCJAG00000005112	HMGB2	3'UTR	AGUGUGGAGUGUGCGUGUGUGCUCAGGCAAUUGUU	GAUAAUGCUGCUUUAAUCACACACGAGGUAUCGCUUCUACU	376	21	0.0558511	1	655	0.0320611
ENSCJAG00000018576	CD69	3'UTR	CAGGGAAAAGUGUUGGAAAAUGUG	CAUAUUUAUUGUUUAUUUAUACCUG	913	742	0.812705	1	990	0.749495
ENSCJAG00000004483	ENSCJAG00000004483_1	3'UTR	GGCAUUUUAUAUAUAGAUGGACAG	UGUUUAUUUAUACCUGAUAAUGCU	911	315	0.345774	1	940	0.335106
ENSCJAG00000004483	ENSCJAG00000004483_2	3'UTR	AGCGGGGCAUUUUAGGAUGUCAGAGC	GUUUAUUUAUACCUGAUAAUGCUGCU	911	512	0.56202	1.67767	940	0.544681
ENSCJAG00000004483	ENSCJAG00000004483_3	3'UTR	GUUUGUAUAUUUGAGGCAUUUAAAAAUCUAUUUUCGUUACAAGGGCAAAUGAAGAAUGAC	UUUAUUGUUUAUUUAUACCUGAUAAUGCUGCUUUAAUCACACACG	911	832	0.913282	2.72622	940	0.885106
ENSCJAG00000011553	KIF1C_1	3'UTR	AUGAGAAAGAAGGUCCGAGUAGGUGAUGGAAGACGAGUGGAUA	UAUUUAUUGUUUAUUUAUACCUGAUAAUGCUGCUUUAAUCAC	524	106	0.20229	1	539	0.19666
ENSCJAG00000011553	KIF1C_1	3'UTR	AGGAAGCUGCCUCGG	ACGAGGUAUCGCUUCUA	524	218	0.416031	2.11183	539	0.404453
ENSCJAG00000013271	ANAPC4_2	3'UTR	UGUGUGAUUAUGGCCAAAAGGACCUAGGAGAUGGAC	GUUUAUUUAUACCUGAUAAUGCUGCUUUAAUCACACA	109	24	0.220183	1	128	0.1875
ENSCJAG00000006627	CDKN2D	3'UTR	GGUGGGAGAGCGUCCUAAAUCAAUAAGAAGGUAGCAU	AUGCUGCUUUAAUCACACACGAGGUAUCGCUUCUACU	556	388	0.697842	1	576	0.673611
ENSCJAG00000016900	TP53RK	3'UTR	UGAAGAAAUGCUGCAAGUAAGAGAGUAGAUUUAAGUAAAGGUGUU	UAUACCUGAUAAUGCUGCUUUAAUCACACACGAGGUAUCGCUUCU	707	53	0.0749646	1	1034	0.0512573
ENSCJAG00000001071	KDM2A_1	3'UTR	AGAAGAGAGACGCC	GGUAUCGCUUCU	2883	1595	0.553243	1.08055	2971	0.536856
ENSCJAG00000001071	KDM2A_2	3'UTR	GGUCGGAAUUUCUUUUGGGUCAAUAU	UUAUUGUUUAUUUAUACCUGAUA	2883	1316	0.456469	0.891541	2971	0.442949
ENSCJAG00000017609	GFI1_1	3'UTR	GGUGCUGCCU	AGGUAUCGCU	1233	499	0.404704	1.67233	1247	0.40016
ENSCJAG00000017609	GFI1_2	3'UTR	CAUUUCCAGCCCUAAUCUACAGACAGGAAUAU	AUAUUUAUUGUUUAUUUAUACCUGAUAAUG	1233	298	0.241687	0.998706	1247	0.238974
ENSCJAG00000017609	GFI1_3	3'UTR	CUGAGAAGACAACAAAG	AUUUAUUGUUUAUUUAU	1233	902	0.731549	3.02293	1247	0.723336
ENSCJAG00000000713	GLCCI1	3'UTR	UAGGGGAACAAGGUGCCUACAGUUAAAGGAACGUUUCAG	CUGAUAAUGCUGCUUUAAUCACACACGAGGUAUCGCUUCUACUA	2350	1796	0.764255	1	2776	0.646974
ENSCJAG00000008329	ENSCJAG00000008329	3'UTR	UUAGCCAGGAGAGAGAGC	GUUUAUUUAUACCUGAUAAUGCUGC	364	26	0.0714286	1	2014	0.0129096
ENSCJAG00000008661	ZDHHC5_1	3'UTR	GGAGGGAACCAGAUCAUUUUUAAACCAG	CUGCUUUAAUCACACACGAGGUAUCGCUUC	1133	280	0.247132	1.00053	1155	0.242424
ENSCJAG00000008661	ZDHHC5_2	3'UTR	GACACUGGUGGUGGUUGGGGAAGAUCAGGAAAAUAAC	UUUAUUUAUACCUGAUAAUGCUGCUUUAAUCACACACGAGGUA	1133	725	0.639894	2.59066	1155	0.627706
ENSCJAG00000022013	MRFAP1L1_1	3'UTR	AGAUGGAAGUGGUUUUGUAUAUAUUUUGGAACU	UGUUUAUUUAUACCUGAUAAUGCUGCUUUAAUCA	885	485	0.548023	1	939	0.516507
ENSCJAG00000022013	MRFAP1L1_2	3'UTR	ACCUUAUGUGACAAGGCAGUGAGUAUGGA	ACCUGAUAAUGCUGCUUUAAUCACACACGAGGU	885	621	0.701695	1.35724	939	0.661342
ENSCJAG00000012596	ASB8_2	3'UTR	AUGGAAAGUACUUAAUGAACGUGUGUGU	ACACUACAUAUUUAUUGUUUAUUUAUACCU	626	303	0.484026	1	626	0.484026
ENSCJAG00000006105	FBXL12	3'UTR	UAGAGGAAAGAGGCCC	AGGUAUCGCUUCUA	593	116	0.195616	1	609	0.190476
ENSCJAG00000015374	ISCU_2	3'UTR	AGUAGAAUGCCUUGGUCUG	UCACACACGAGGUAUCGCUUCUACUA	435	345	0.793103	1	463	0.74514
ENSCJAG00000012641	DCAKD_2	3'UTR	GGUCCCUGUGC	ACACGAGGUAUCG	195	137	0.702564	1	503	0.272366
ENSCJAG00000009307	ZBTB7B_2	3'UTR	AGGCUGAAGCAGCACAAGG	CCUGAUAAUGCUGCUUUAAUCA	1822	17	0.00933041	1.01088	1841	0.00923411
ENSCJAG00000009307	ZBTB7B_3	3'UTR	AAGCUGAGAAGGUAU	AUACCUGAUAAUGCUG	1822	154	0.0845225	9.15737	1841	0.0836502
ENSCJAG00000009307	ZBTB7B_4	3'UTR	ACCUCGGGUGUAAGCGA	CUGCUUUAAUCACACACGAGGU	1822	1793	0.984083	106.618	1841	0.973927
ENSCJAG00000004153	AKT1S1	3'UTR	GUGGGGGAGAGAGUGAGGGGUUGGGGGACCGGCAGUUGGG	CCUGAUAAUGCUGCUUUAAUCACACACGAGGUAUCGCUUCUAC	538	476	0.884758	1	552	0.862319
ENSCJAG00000007343	SPSB2_1	3'UTR	GGGGCCUUGCC	GGUAUCGCUUC	234	26	0.111111	1.08932	839	0.0309893
ENSCJAG00000007343	SPSB2_2	3'UTR	GGAAGAGAGCGAGC	GCUGCUUUAAUCA	234	167	0.713675	6.99682	839	0.199046
ENSCJAG00000012438	TRIOBP	3'UTR	GAGUAGAGGUGGGUGCCGAGGCGUGCACCCUGCAGGC	ACCUGAUAAUGCUGCUUUAAUCACACACGAGGUAUCGCUUCUACUA	681	0	0	1	694	0
ENSCJAG00000018049	NCOA6_1	3'UTR	CGGUGACGAUACUUGUAAAUGUGUGUGA	AUCACACACGAGGUAUCGCUUCUACUA	507	11	0.0216963	0.999827	550	0.02
ENSCJAG00000018049	NCOA6_2	3'UTR	UGUAGAAAUGGACCAGUGAAUAAAGAGAAUCUAAGG	CCUGAUAAUGCUGCUUUAAUCACACACGAGGUAUCGCUUCUACU	507	436	0.859961	39.6295	550	0.792727
ENSCJAG00000023133	RPRM	3'UTR	AGCAGACAUGAUGGGGU	ACCUGAUAAUGCUGCU	872	423	0.485092	1	890	0.475281
ENSCJAG00000001798	CPSF6	3'UTR	UGAAUAAAGCAAAUCUGCAUAAAUGGUA	UACCUGAUAAUGCUGCUUUAAUCA	423	135	0.319149	1	4858	0.0277892
ENSCJAG00000020790	RHOV_1	3'UTR	AUGGGGCAGAUGAGGAGCAGGC	ACCUGAUAAUGCUGCUUUAA	840	560	0.666667	0.9995	854	0.655738
ENSCJAG00000020790	RHOV_2	3'UTR	GGGGAGGAGCUGCAAAUUAGAGCCUGAAGCAGGAUGGAGUUGAGGA	ACCUGAUAAUGCUGCUUUAAUCACACACGAGGUAUCGCUUCUACUA	840	730	0.869048	1.30292	854	0.854801
ENSCJAG00000010152	SQSTM1	3'UTR	AGUAAGAUCUCUUUGUAGCUAUCCUGUUAUAUUUGUUAACAAUC	UAUUGUUUAUUUAUACCUGAUAAUGCUGCUUUAAUCACACA	643	589	0.916019	1	669	0.880419
ENSCJAG00000005608	TRAPPC10_1	3'UTR	AAGAUCUUUUGCAAACUGUGUUAAUGAGUGCU	UGCUGCUUUAAUCACACACGAGGUAUCGCUUCUA	2379	2059	0.86549	1.00057	3038	0.677749
ENSCJAG00000005608	TRAPPC10_2	3'UTR	UGUGAAGCCAGAUAUACAAUGUGUGUGUUUCAAAAAGCAA	CUGCUUUAAUCACACACGAGGUAUCGCUUCUACU	2379	2274	0.955864	1.10504	3038	0.748519
ENSCJAG00000005608	TRAPPC10_3	3'UTR	UGCUCAUCAGAAAAGUACUAAAAGAGUAACUGUAA	CUACAUAUUUAUUGUUUAUUUAUACCUGAUAAUGCU	2379	2148	0.9029	1.04382	3038	0.707044
ENSCJAG00000008073	NCK2_1	3'UTR	AGAGGGAACCGGUGACUCAGAAAGACAGAUGUUUUGGUAAUUUACCCCAAAUGUG	CAUAUUUAUUGUUUAUUUAUACCUGAUAAUGCUGCUUUAAUCACACACGAGGUAUCGCUUCU	1072	582	0.54291	0.999835	1090	0.533945
ENSCJAG00000008073	NCK2_2	3'UTR	AGUAUGUGAUUGGUAGUAAGAGACACAGAAUGUUUAUGAAGAAA	AUUGUUUAUUUAUACCUGAUAAUGCUGCUUUAAUCACACACG	1072	886	0.826493	1.52209	1090	0.812844
ENSCJAG00000002454	C1orf86	3'UTR	AGAAGCCCCUCCUC	GAGGUAUCGCUUCU	110	69	0.627273	1.4387	145	0.475862
ENSCJAG00000000664	CPOX	3'UTR	GAUGCUGUCAGUGAUGAAUGGUGAGAUGGAAGAUUGUCAGUCAAUUGAUUAAACC	UGUUUAUUUAUACCUGAUAAUGCUGCUUUAAUCACACACGAGGUAUC	1102	166	0.150635	1	1256	0.132166
ENSCJAG00000020202	STOM_1	3'UTR	AGAUACUGAGAGAUUGGUGAUUUAUAUAAGGUAA	CUGCUUUAAUCACACACGAGGUAUCG	1111	165	0.148515	0.996744	2091	0.0789096
ENSCJAG00000020202	STOM_2	3'UTR	CAGAGGCAAGAACCU	AGGUAUCGCUUCUA	1111	312	0.280828	1.88475	2091	0.149211
ENSCJAG00000020202	STOM_3	3'UTR	UGCCUUAUCUCCAGAGAUCCAGAGAGUC	UGCUGCUUUAAUCACACACGAGGUAUCGCU	1111	411	0.369937	2.4828	2091	0.196557
ENSCJAG00000016632	VGLL4_1	3'UTR	CUGGGACAGGUCUCUUUGUCAGUGAACAAGGGCGUC	AAUGCUGCUUUAAUCACACACGAGGUAUCGCUUCUAC	2466	2088	0.846715	0.999664	2479	0.842275
ENSCJAG00000016632	VGLL4_2	3'UTR	GGCCUCGGGCAGAGGGGGCAGCAGCAGAAAACCAAACAAA	AUUGUUUAUUUAUACCUGAUAAUGCUGCUUUAAUCACACACGAGGUA	2466	2203	0.89335	1.05472	2479	0.888665
ENSCJAG00000023383	HNRNPA3_2	3'UTR	GGAGAGAGAGCGAGGAGUUGUCAGGAAAGCUGCAGG	AUUGUUUAUUUAUACCUGAUAAUGCUGCUUUAAUCA	364	33	0.0906593	1	3959	0.00833544
ENSCJAG00000009416	SUCO	3'UTR	CAUUUUGUGUUGUGAUAUUUAAGUUAUUAAGCAC	AUGCUGCUUUAAUCACACACGAGGUA	1537	1179	0.767079	1	1558	0.756739
ENSCJAG00000009828	APLP1	3'UTR	CAAGCCCAGACCUCC	CGAGGUAUCGCUUC	338	25	0.0739645	1	359	0.0696379
ENSCJAG00000013013	IRF1_1	3'UTR	GGCAUGUCAGGUCGGGGACUUGGACAG	UUGUUUAUUUAUACCUGAUAAUGCUG	851	247	0.290247	1	863	0.286211
ENSCJAG00000013013	IRF1_2	3'UTR	AGAGAUAGUUGCACUAAGUAAAUC	UGUUUAUUUAUACCUGAUAAUGCUGCUUUAAUCA	851	401	0.47121	1	863	0.464658
ENSCJAG00000018688	POLR2G	3'UTR	CGGAAGGUUCUUCUGUUGGCUUAGCU	UGCUUUAAUCACACACGAGGUAUCGCUUCUA	249	117	0.46988	1	249	0.46988
ENSCJAG00000005681	CD48	3'UTR	UGUAAAGGAUGAGCCGUGUGCUGC	ACACUACAUAUUUAUUGUUUAUU	272	84	0.308824	1	300	0.28
ENSCJAG00000017521	RAB7A	3'UTR	AGAUCUGAAGUAAGCAA	AUGCUGCUUUAAUCA	1374	205	0.149199	1	1391	0.147376
ENSCJAG00000017934	RGS3_1	3'UTR	AAAGGUCUGUGUUAUUU	UGAUAAUGCUGCUUUA	ND	760	ND	ND	790	0.962025
ENSCJAG00000017934	RGS3_2	3'UTR	GAGUCGAAGGACGGGCCCCGUA	CACGAGGUAUCGCUUCUACUA	764	176	0.230366	1.00159	790	0.222785
ENSCJAG00000017934	RGS3_3	3'UTR	CAGAGGCUUUGCAUUGAC	ACGAGGUAUCGCUUCUA	764	299	0.391361	1.70157	790	0.378481
ENSCJAG00000017934	RGS3_4	3'UTR	UAGUAGUCGGAUGCUUGGCACGUUGUCCUGUAA	AUACCUGAUAAUGCUGCUUUAAUCACACACGAGGUAUCGCUUCUACUA	764	436	0.570681	2.48122	790	0.551899
ENSCJAG00000016069	KLF10_2	3'UTR	CAGUGACACACCAGAAAGUGAAGAGUCAGA	GCUGCUUUAAUCACACACGAGGUAUCGCUU	1323	0	0	1	1346	0
ENSCJAG00000005346	PDXDC1	3'UTR	AAGAGGAAGUGAUACUGGAAAUGUGAACUGUGCCACAU	AAUGCUGCUUUAAUCACACACGAGGUAUCGCUUCUACUA	94	45	0.478723	1	282	0.159574
ENSCJAG00000003638	GTF2H5	3'UTR	AGGAGCAUGCCACAGGAAAGACCAAGGGAUCAUUUGUUCAGA	CCUGAUAAUGCUGCUUUAAUCACACACGAGGUAUCGCUUCUA	197	100	0.507614	1	258	0.387597
ENSCJAG00000001557	C1orf216	3'UTR	AUGGGAGAGAGCCGUCGUGUGUGCAGGGGUGCAU	AUGCUGCUUUAAUCACACACGAGGUAUCGCUUCUAC	1738	416	0.239356	1	1755	0.237037
ENSCJAG00000019702	MAX_2	3'UTR	GAGGGCUGCGUGGAUUCUUGUG	UACCUGAUAAUGCUGUUUUA	1263	684	0.541568	0.999202	1284	0.53271
ENSCJAG00000019702	MAX_3	3'UTR	AGAGGUUUUGUAUUGAGGGCCAGUGAUGAUGA	ACAUAUUUAUUGUUUAUUUAUACCUGAUAAUGCUGCUUUA	1263	794	0.628662	1.15989	1284	0.61838
ENSCJAG00000005740	CASP3_1	3'UTR	AGAUCUGAAGAGCUAUUGUAUAAG	UUUAUACCUGAUAAUGCUGCUUUAAUCA	828	761	0.919082	1.24537	1570	0.484713
ENSCJAG00000005740	CASP3_2	3'UTR	GAGGAAGCUAGGUUGACUCUCAAGGC	ACCUGAUAAUGCUGCUUUAAUCA	828	611	0.737923	0.999895	1570	0.389172
ENSCJAG00000004804	CBLB	3'UTR	UAGCAGCCAGAACAGUAAACAC	UUGUUUAUUUAUACCUGAUAAUGCUGCUU	650	0	0	1	3444	0
ENSCJAG00000002653	PRDM16_1	3'UTR	CGGAGCUGCAUCGAAGA	CCUGAUAAUGCUGCUUUA	1495	255	0.170569	0.997477	2078	0.122714
ENSCJAG00000002653	PRDM16_2	3'UTR	UGGCCGGGUGCCUACGUGGGGCCUCGGAAGGGAAUGGAUAGACGGG	AUUGUUUAUUUAUACCUGAUAAUGCUGCUUUAAUCACACACGAGGUAUCGCUU	1495	335	0.22408	1.31041	2078	0.161213
ENSCJAG00000017657	MGEA5_1	3'UTR	UGCAGUUUUGCAUCAGCUGUUUAACU	UGUUUAUUUAUACCUGAUAAUGCUGCU	1967	1319	0.670564	5.04184	1986	0.664149
ENSCJAG00000017657	MGEA5_2	3'UTR	GGGUUUAUACAGGGAGAGACUUCAAUAAAU	AUUUAUUGUUUAUUUAUACCUGAUAAUGCUG	1967	261	0.132689	0.997664	1986	0.13142
ENSCJAG00000037004	FDX1L	3'UTR	CUGAGAAUCGGUGUGAAUAGGAGUGGACUCAGA	CCUGAUAAUGCUGCUUUAAUCACACACGAGGUAUCGC	258	207	0.802326	1	276	0.75
ENSCJAG00000021374	CDYL	3'UTR	CGCUAUUUAUUAUCGGGGAGUUUUUAAAGUACUGUAA	CUACAUAUUUAUUGUUUAUUUAUACCUGAUAAUGCUGCU	191	140	0.732984	1	1487	0.0941493
ENSCJAG00000008013	CNIH4	3'UTR	AGUGCACAGAUGAGGAGCCAGA	CCUGAUAAUGCUGCUUUAAUCACACACG	157	38	0.242038	1	246	0.154472
ENSCJAG00000004749	SMAD7_1	3'UTR	CGGUAGCCGCGUGCAGAGGGGACAGAGCGUGCGCUGAGCAGG	CCUGAUAAUGCUGCUUUAAUCACACACGAGGUAUCG	1433	0	0	1	1540	0
ENSCJAG00000004749	SMAD7_2	3'UTR	AUGGGGAGGCGACGUGCUCU	CGAGGUAUCGCUUCUACUAA	1433	401	0.279833	ND	1540	0.26039
ENSCJAG00000006210	SH2B1	3'UTR	CGUGGUUGAGCUGGUCCCCGUGGUUGAAUUGGAAGAGGCC	UGCUGCUUUAAUCACACACGAGGUAUCGCUUCUACU	728	166	0.228022	1	751	0.221039
ENSCJAG00000012537	CBX7	3'UTR	UGUGUGUGCUGGGAGAGUCAGAGUGGAUGUAGAGCGCGGUU	UAUUGUUUAUUUAUACCUGAUAAUGCUGCUUUAAUCACACACG	3079	2948	0.957454	1	3097	0.951889
ENSCJAG00000012289	SARAF_2	3'UTR	CGAUAAAGUAGAAAGUUGGAGUCAAACACUGGAUGC	AUAUUUAUUGUUUAUUUAUACCUGAUAAUGCUGCUUUAAUCA	761	0	0	1	793	0
ENSCJAG00000021620	ATF7IP	3'UTR	AAUCUUGUGCAUGAUACCCCACGUAAAAUCC	UGAUAAUGCUGCUUUAAUCACACACGAGGUA	157	58	0.369427	1	676	0.0857988
ENSCJAG00000020688	MGA	3'UTR	AAGAAGCAUGAUCUCGGUA	CACACGAGGUAUCGCUUCUA	2470	2412	0.976518	1	2655	0.908475
ENSCJAG00000012711	MED28	3'UTR	UAGUGGGAACAGUGAUACG	GGUAUCGCUUCUACUA	1718	681	0.396391	1	1887	0.36089
ENSCJAG00000011804	TBRG4	3'UTR	UGUGGGACCUUGGCCAGAGUGGGGAGGGCGGCCAGCAGCUCUGAGGAAC	GUUUAUUUAUACCUGAUAAUGCUGCUUUAAUCACACACGAGGUAUCGCU	176	100	0.568182	1	238	0.420168
ENSCJAG00000014207	NAXD	3'UTR	GGGAGAGCGUGUGUGACGGCAAAAUCGGA	CCUGAUAAUGCUGCUUUAAUCACACACGAGGUAUCGCUUCUA	1359	39	0.0286976	1	1381	0.0282404
ENSCJAG00000011890	GATD1	3'UTR	AGAGCGAAACUUAUCUCGA	ACGAGGUAUCGCUUC	1130	1102	0.975221	1	2929	0.376238
ENSCJAG00000009561	PRC1_1	3'UTR	UCAGCAUUUGUCCCUGGC	ACCUGAUAAUGCUGC	590	211	0.357627	0.998958	618	0.341424
ENSCJAG00000009561	PRC1_2	3'UTR	UGGAACUUUGCACAUGUCACUACGGGGGAGUU	UAUUUAUACCUGAUAAUGCUGCUUUAAUCACAC	590	343	0.581356	1.6239	618	0.555016
ENSCJAG00000017987	CSNK1D_1	3'UTR	GGGAGUCCCAGGAUUAAAGGUGGAAGAUGC	UUAUUUAUACCUGAUAAUGCUGCUUUA	2216	987	0.445397	1.20053	2238	0.441019
ENSCJAG00000017987	CSNK1D_2	3'UTR	CGAGGCCCUCAGAGAGCAGUUAGGGACUGCAGGC	ACCUGAUAAUGCUGCUUUAAUCACACACGAGGUAUCGCUUCU	2216	823	0.37139	1.00105	2238	0.367739
ENSCJAG00000004141	SLC4A7	3'UTR	AUAGAAUUGAACCAAGAGGCAUUAUACAUAUAGAUAC	UUAUUUAUACCUGAUAAUGCUGCUUUAAUCACACACGAGGUAUCGCUUCUAC	1563	0	0	1	4061	0
ENSCJAG00000006503	CTDSP2	3'UTR	AGUGAUUGGAAAGAGCUUUAGG	CCUGAUAAUGCUGCUUUAAUCACA	ND	121	ND	ND	801	0.151061
ENSCJAG00000007331	PRKACB	3'UTR	CAGUGAUUGCACUCUGUUGAGAGAUAAGGUAGA	GCUGCUUUAAUCACACACGAGGUAUCGCUU	578	32	0.0553633	1	3171	0.0100915
						Total No. Targets	110			112
