# Supplementary material for: Viral miRNA adaptor differentially recruits miRNAs to target mRNAs through alternative base-pairing
Source: eLife. 2019 Sep 20;8:e50530. doi: 10.7554/eLife.50530 (PMC6763288; doi:10.7554/eLife.50530)
Supplement: Figure 2—source data 1. — All identified interactions involve sequences located between the 5’ end and the binding site for Sm proteins in HSUR2 (Figure 2C). Surprisingly, conserved sequences (Cazalla et al., 2010) in the 3’ terminal loop of HSUR2 are not found to participate in base-pairing with target mRNAs. Even though HSUR2 binds to target sequences with a significantly lower Gibbs free energy difference (ΔG) when compared to random sequences of similar length (Figure 2D), HSUR2 does not utilize a dedicated single sequence to do so (Figure 2C and Supplementary file 2). Thorough sequence analysis of 171 HSUR2 binding sites (see Materials and methods), with lengths ranging from 11 to 66 nts (Figure 2—figure supplement 1B and Supplementary file 2), failed to identify a sequence motif shared by most targets. HSUR2 sequences involved in interactions with target mRNAs differ in length (Figure 2—figure supplement 1B) and identity for each target (Figure 1C,D and Figure 1—figure supplement 2C; see also Supplementary file 2). Even in cases in which HSUR2 utilizes a similar subregion to base-pair with two different targets, the arrangement of base pairs always differs between the two interactions (Figure 1—figure supplement 2A–C). Altogether, these findings suggest that unlike other classes of small ncRNAs that participate in RNA-based regulatory systems (Gorski et al., 2017), HSUR2 does not feature a subregion or seed sequence that binds to target mRNAs, but instead uses different sequences to interact with different RNA partners, a characteristic shared with other Sm-class ncRNAs (Cotten et al., 1988; Nilsen, 1994; Roca and Krainer, 2009; Staley and Guthrie, 1998). [file elife-50530-fig2-data1.xlsx]

## Sheet: Sheet1
mRNATarget	HSUR2	MFE	DeltaG	#RandomMFEHits	RandomMeanMFE	pValMFE	#RandomDeltaGHits	RandomMeanDeltaG	pValDeltaG
GAGAGAGGTCGATATCGAAGATAATCCGATTTTGGAAGCAATGATTGTTTAAAGATACAAAAAATC	UAUUUAUUGUUUAUUUAUACCUGAUAAUGCUGCUUUAAUCACACACGAGGUAUCGCUUCUACUA	-25.2	-13.71	108	-24.6322	0.432	4	-6.07148	0.016
TGGCAGAAGACACCAGAGCAGATGCAG	CUGAUAAUGCUGCUUUAAUCACACACGAGGUAUCGCUUCUACUA	-14.5	-10.58	60	-12.01	0.24	9	-5.13816	0.036		MFE	real minimum free energy
GTAGAAGCATTCCTTCTTTGATAATGTTAAATTTGTAAGTTTCAGGTGACATGTGAAA	GUUUAUUUAUACCUGAUAAUGCUGCUUUAAUCACACACGAGGUAUCGCUUCUAC	-27.7	-16.49	51	-22.7332	0.204	0	-5.90036	0		DeltaG	real delta G
TTAGCCAGGATCATGGTGTAATAAGACA	UGUUUAUUUAUACCUGAUAAUGCUGC	-17.6	-14.05	2	-8.2468	0.008	0	-4.13928	0		#RandomMFEHits	number random MFE scores that >= real MFE
GCAGTGGAGATGAAAAAGCCCTAAAG	AUUUAUUGUUUAUUUAUACCUGAUAAUGCUGC	-10.2	-8.73	54	-7.4084	0.216	6	-3.42656	0.024		RandomMeanMFE	mean of the random MFE scores
ATGATTCTGCAGCATAATCAA	CUGAUAAUGCUGCUUUAAUCAC	-17.9	-15.76	0	-6.3408	0	0	-3.89412	0		pValMFE	pValue #RandomMFEHits/ 250 trials
GTGAAGGCAGTTTTTAT	GAUAAUGCUGCUUUAAUCAC	-11.4	-11.31	5	-4.8732	0.02	3	-4.14116	0.012		#RandomDeltaGHits	number random delta G scores that <= real delta G
AAGTGGGGAGGAAGGGGAAGCTAGATGGACTATGAGA	UUUAUUGUUUAUUUAUACCUGAUAAUGCUGCUU	-15.3	-13.04	43	-11.2856	0.172	0	-4.31336	0		RandomMeanDeltaG	mean of the random delta G scores
CAGCTGGGCACCATGGTGATCAATGCAGAGGATGAGGAAGAGGAAGGGACTATGAA	AUUUAUUGUUUAUUUAUACCUGAUAAUGCUGCUUUAAUCACACACGAGGUAUCGCUU	-25.9	-17.88	45	-20.6072	0.18	1	-5.56932	0.004		pValDeltaG	pValue #RandomDeltaGHits / 250 trials
AGATTGAAGAGATCCGGCAGAAGTACCAGT	CCUGAUAAUGCUGCUUUAAUCA	-13.2	-11.64	30	-8.6516	0.12	4	-4.55352	0.016
AGGAATGTGCGCCAGTGGGAAGGGCTCTCTTGACAGT	CCUGAUAAUGCUGCUUUAAUCACACACGAGGUAUCGCUUCUA	-15.7	-7.79	95	-14.5228	0.38	43	-5.53316	0.172
GGGTAGAGCGTAGCATTTTTATGG	ACCUGAUAAUGCUGCUUUAAUCA	-15.1	-14.51	4	-7.7752	0.016	1	-4.97192	0.004
GATGAAGGCAG	CUGCUUUAAUC	-7.1	-9.22	6	-2.1756	0.024	1	-2.37548	0.004
ATGTGGGCATGAAACTCAGGAGACGAA	AUUGUUUAUUUAUACCUGAUAAUGCUGCUUUAAUCACAC	-13.5	-11.77	22	-8.7928	0.088	4	-5.18184	0.016
GTCCCTGACGCTGAGCACTGGCTTCCGGGT	ACCUGAUAAUGCUGCUUUAAUCACACACG	-11	-4.19	75	-9.1216	0.3	130	-4.85864	0.52
GGGGTGGAGACTTTTGGGCAG	CUGCUUUAAUCACACACGAGGUAUCGCUUC	-10.7	-9.47	57	-8.5396	0.228	10	-4.66948	0.04
ATGGGACAGATCAATCTCA	CGAGGUAUCGCUUCUAC	-9.1	-3.53	50	-7.1912	0.2	71	-2.46388	0.284
GTGAGGATAAAGAGCGTGAGG	CCUGAUAAUGCUGCUUUAAUCAC	-11.6	-12.13	19	-6.5132	0.076	0	-4.4232	0
AGTGACCTGGATCCCGTGTGTGATGCGGTCTCTTATC	GAUAAUGCUGCUUUAAUCACACACGAGGUAUCGCUUCUACU	-27.5	-17.07	2	-14.7084	0.008	0	-5.30532	0
CTCAGGTGAAAAAGCAATGAC	UUUAUUGUUUAUUUAUACCUGAU	-16.3	-15.72	0	-4.892	0	0	-3.18052	0
TGTTTAGGGTCCAGTTGATTTGTGTA	UAUACCUGAUAAUGCUGCUUUAAUCA	-7.9	-8.89	120	-7.956	0.48	23	-4.6616	0.092
AAGAAGCTGTAGGTGATTGGGGGAAAGGGGAAAGAATTCACTAGAAATT	UAUUUAUUGUUUAUUUAUACCUGAUAAUGCUGCUUUAAUCACACACGAGGUAUCGCUUCUA	-21.2	-14.08	103	-20.1424	0.412	4	-6.03348	0.016
CTGAGATGTCGTGTGTGT	CACACACGAGGUAUCGC	-18.4	-16.95	0	-5.5912	0	0	-2.87216	0
TGCTTTTATCATTTTAAAGATAGTTATTTGTAGA	ACUACAUAUUUAUUGUUUAUUUAUACCUGAUAAUGCU	-13.2	-10.35	39	-9.5088	0.156	2	-3.20164	0.008
GAGGAGGAGGAGGAAGAAGTGTCTGACAGCTAGCAAACTAAGA	CCUGAUAAUGCUGCUUUAAUCACACACGAGGUAUCGCUUCUACUA	-20.2	-15.31	75	-17.2888	0.3	2	-5.85076	0.008
AGTGTGGAGTGTGCGTGTGTGCTCAGGCAATTGTT	GAUAAUGCUGCUUUAAUCACACACGAGGUAUCGCUUCUACU	-25.4	-17.13	0	-13.7516	0	0	-5.06372	0
CAGGGAAAAGTGTTGGAAAATGTG	CAUAUUUAUUGUUUAUUUAUACCUG	-7.8	-9.77	35	-5.0876	0.14	4	-3.07036	0.016
GGCATTTTATATATAGATGGACAG	UGUUUAUUUAUACCUGAUAAUGCU	-16.2	-14.4	0	-6.0268	0	0	-3.27572	0
AGCGGGGCATTTTAGGATGTCAGAGC	GUUUAUUUAUACCUGAUAAUGCUGCU	-13.1	-8.57	16	-7.694	0.064	16	-4.2822	0.064
GTTTGTATATTTGAGGCATTTAAAAATCTATTTTCGTTACAAGGGCAAATGAAGAATGAC	UUUAUUGUUUAUUUAUACCUGAUAAUGCUGCUUUAAUCACACACG	-20.9	-14.55	90	-18.7298	0.36	0	-5.2546	0
AGGAAGCTGCCTCGG	ACGAGGUAUCGCUUCUA	-19.3	-15.07	0	-5.8024	0	0	-2.14144	0
TAAGCTCCAATCTTCGTCATGTGAGAGTATTTGAAATGGACATAGATGATGAATGG	AUAUUUAUUGUUUAUUUAUACCUGAUAAUGCUGCUUUAAUCACACACGAGGUAUCGCUUC	-24.8	-9.88	56	-20.9195	0.224	15	-5.62004	0.06
TGTGTGATTATGGCCAAAAGGACCTAGGAGATGGAC	GUUUAUUUAUACCUGAUAAUGCUGCUUUAAUCACACA	-19.3	-17.36	9	-10.4548	0.036	0	-5.07028	0
GGTGGAGGAAGCCAAGCGCATCATGGAAAAGCAGTTGCTCGA	CUGAUAAUGCUGCUUUAAUCACACACGAGGUAUCGCUUCUACU	-21.7	-13.23	37	-16.2516	0.148	5	-5.7452	0.02
GGTGGGAGAGCGTCCTAAATCAATAAGAAGGTAGCAT	AUGCUGCUUUAAUCACACACGAGGUAUCGCUUCUACU	-23.6	-16.57	7	-14.264	0.028	0	-5.49348	0
TGAAGAAATGCGGCAAGTAAGAGAGGCGATCTAAGTAAAGGTGTT	UAUACCUGAUAAUGCUGCUUUAAUCACACACGAGGUAUCGCUUCU	-19.1	-12.64	110	-18.2484	0.44	4	-5.42336	0.016
AGAAGAGAGACGCC	GGUAUCGCUUCU	-7.3	-8.26	24	-4.3144	0.096	5	-4.12224	0.02
GGTCGGAATTTCTTTTGGGTCAATAT	UUAUUGUUUAUUUAUACCUGAUA	-5.9	-3.88	116	-5.85	0.464	87	-3.34544	0.348
GGTGCTGCCT	AGGUAUCGCU	-8	-7.65	1	-2.8456	0.004	1	-3.10852	0.004
CATTTCCAGCCCTAATCTACAGACAGGAATAT	AUAUUUAUUGUUUAUUUAUACCUGAUAAUG	-6.3	-5.08	177	-8.1548	0.708	34	-2.62456	0.136
CTGAGAAGACAACAAAG	AUUUAUUGUUUAUUUAU	-4.5	-5.42	36	-2.4756	0.144	10	-1.72812	0.04
TAGGGGAACAAGGTGCCTACAGTTAAAGGAACGTTTCAG	CUGAUAAUGCUGCUUUAAUCACACACGAGGUAUCGCUUCUACUA	-18.7	-11.59	60	-15.608	0.24	10	-5.35908	0.04
TTAGCCAGGAGAGAGAGC	GUUUAUUUAUACCUGAUAAUGCUGC	-7.2	-7.47	66	-5.464	0.264	22	-3.9072	0.088
GGAGGGAACCAGATCATTTTTAAACCAG	CUGCUUUAAUCACACACGAGGUAUCGCUUC	-9.5	-7.36	136	-10.0292	0.544	20	-4.40112	0.08
GACACTGGTGGTGGTTGGGGAAGATCAGGAAAATAAC	UUUAUUUAUACCUGAUAAUGCUGCUUUAAUCACACACGAGGUA	-27.8	-21.34	1	-12.5324	0.004	0	-4.37152	0
AGATGGAAGTGGTTTTGTATATATTTTGGAACT	UGUUUAUUUAUACCUGAUAAUGCUGCUUUAAUCA	-14.2	-12.08	40	-10.0752	0.16	6	-4.91436	0.024
ACCTTATGTGACAAGGCAGTGAGTATGGA	ACCUGAUAAUGCUGCUUUAAUCACACACGAGGU	-22.2	-17.06	0	-9.4384	0	0	-4.5392	0
ATGGAAAGTACTTAATGAACGTGTGTGT	ACACUACAUAUUUAUUGUUUAUUUAUACCU	-12.4	-12.76	9	-6.042	0.036	1	-2.87432	0.004
TAGAGGAAAGAGGCCC	AGGUAUCGCUUCUA	-8.9	-8.72	16	-4.8376	0.064	9	-3.99424	0.036
AGTGGATGAAAAGGGGAAGATCGTGGATGCTAGGTTTAAAACAT	UUGUUUAUUUAUACCUGAUAAUGCUGCUUUAAUCACACACG	-17.5	-15.25	67	-13.8892	0.268	2	-5.5494	0.008
AGTAGAATGCCTTGGTCTG	UCACACACGAGGUAUCGCUUCUACUA	-16.3	-13.63	2	-7.7664	0.008	0	-3.63776	0
GAGTGGAGCGTCACCA	AGGUAUCGCUUCUACUA	-16.3	-14.04	0	-5.0428	0	0	-3.74	0
GGTCCCTGTGC	ACACGAGGUAUCG	-8.4	-7.71	7	-3.3776	0.028	4	-2.47216	0.016
AGATGCCTCAGGAGTGCCCTGTCTGCCACAAGATCAT	CUGAUAAUGCUGCUUUAAUCACACACGAGGUAUCG	-19.2	-11.59	20	-13.1992	0.08	6	-5.03208	0.024
AGGCTGAAGCAGCACAAGG	CCUGAUAAUGCUGCUUUAAUCA	-15.5	-13	0	-6.1988	0	2	-4.62216	0.008
AAGCTGAGAAGGTAT	AUACCUGAUAAUGCUG	-8.7	-8.81	4	-3.9124	0.016	2	-3.66368	0.008
ACCTCGGGTGTAAGCGA	CUGCUUUAAUCACACACGAGGU	-17.1	-15.45	0	-5.0704	0	0	-3.99416	0
GTGGGGGAGAGAGTGAGGGGTTGGGGGACCGGCAGTTGGG	CCUGAUAAUGCUGCUUUAAUCACACACGAGGUAUCGCUUCUAC	-23.4	-15.12	13	-15.9632	0.052	0	-5.9538	0
GATCACCTCGTGACAGAGATCGGAAAGATAAGAAGC	GUUUAUUUAUACCUGAUAAUGCUGCUUUAAUCACACACGAGGUAUC	-19	-11.38	27	-13.204	0.108	4	-3.53872	0.016
AGAGCGCGAAGCAGGGGAGATCTAACTAGCTGTGT	ACAUAUUUAUUGUUUAUUUAUACCUGAUAAUGCUGCUUUA	-15.6	-9.69	32	-10.926	0.128	14	-4.5482	0.056
GGGGCCTTGCC	GGUAUCGCUUC	-6.8	-7.66	9	-3.2052	0.036	5	-3.3746	0.02
GGAAGAGAGCGAGC	GCUGCUUUAAUCA	-7.2	-9.46	22	-3.5564	0.088	2	-3.49736	0.008
GAGTAGAGGTGGGTGCCGAGGCGTGCACCCTGCAGGC	ACCUGAUAAUGCUGCUUUAAUCACACACGAGGUAUCGCUUCUACUA	-31.8	-13.15	1	-15.226	0.004	4	-5.90464	0.016
CGGTGACGATACTTGTAAATGTGTGTGA	AUCACACACGAGGUAUCGCUUCUACUA	-21.5	-15.93	0	-10.0932	0	0	-3.75056	0
TGTAGAAATGGACCAGTGAATAAAGAGAATCTAAGG	CCUGAUAAUGCUGCUUUAAUCACACACGAGGUAUCGCUUCUACU	-16.9	-14.82	81	-14.8408	0.324	2	-5.71784	0.008
AGCAGACATGATGGGGT	ACCUGAUAAUGCUGCU	-14.3	-15.39	1	-5.3556	0.004	0	-4.64572	0
GTGGCTATTTGTTG	GAUAAUGCUGC	-5.4	-5.54	40	-3.1404	0.16	23	-2.89332	0.092
TGAATAAAGCAAATCTGCATAAATGGTA	UACCUGAUAAUGCUGCUUUAAUCA	-13.5	-12.34	27	-8.8376	0.108	1	-5.14744	0.004
AGTGAGGAGAAGCAGCAGCAGCTGGTCAGACAGGTGTGCGTGGGCTGTTTTATGAGTT	CACUACAUAUUUAUUGUUUAUUUAUACCUGAUAAUGCUGCUUUAAUCACA	-34.7	-18.17	4	-18.4952	0.016	1	-5.73548	0.004
GGTTGCAGCATTGTCAAAGGGTAAAAAATTTGACAAA	AUUGUUUAUUUAUACCUGAUAAUGCUGCUUUAAUCA	-25.8	-19.28	0	-11.5412	0	0	-5.14456	0
GGGGAGGAGCTGCAAATTAGAGCCTGAAGCAGGATGGAGTTGAGGA	ACCUGAUAAUGCUGCUUUAAUCACACACGAGGUAUCGCUUCUACUA	-22.2	-13.57	49	-17.9316	0.196	4	-5.94824	0.016
TGGGCTGGAGGAGGACGATGAGGA	ACCUGAUAAUGCUGCUUUAAUCACAC	-12.6	-11.75	22	-7.7496	0.088	1	-4.74688	0.004
AGTAAGATCTCTTTGTAGCTATCCTGTTATATTTGTTAACAATC	UAUUGUUUAUUUAUACCUGAUAAUGCUGCUUUAAUCACACA	-12.3	-8.43	164	-14.2632	0.656	38	-5.33548	0.152
AAGGAGAAGAACACTGTGGACATCTAATTGAGGCC	UGCUUUAAUCACACACGAGGUAUCGCUUCUA	-14.2	-11.11	90	-12.9116	0.36	1	-4.32616	0.004
AAGATCTTTTGCAAACTGTGTTAATGAGTGCT	UGCUGCUUUAAUCACACACGAGGUAUCGCUUCUA	-12.4	-7.04	134	-13.0056	0.536	48	-5.05564	0.192
TGTGAAGCCAGATATACAATGTGTGTGTTTCAAAAAGCAA	CUGCUUUAAUCACACACGAGGUAUCGCUUCUACU	-26.1	-14.74	3	-14.0628	0.012	0	-4.65776	0
TGCTCATCAGAAAAGTACTAAAAGAGTAACTGTAA	CUACAUAUUUAUUGUUUAUUUAUACCUGAUAAUGCU	-9.7	-6.26	124	-10.0132	0.496	27	-3.45532	0.108
AGAGGGAACCGGTGACTCAGAAAGACAGATGTTTTGGTAATTTACCCCAAATGTG	CAUAUUUAUUGUUUAUUUAUACCUGAUAAUGCUGCUUUAAUCACACACGAGGUAUCGCUUCU	-21.7	-11.7	117	-21.4838	0.468	10	-6.00604	0.04
AGTATGTGATTGGTAGTAAGAGACACAGAATGTTTATGAAGAAA	AUUGUUUAUUUAUACCUGAUAAUGCUGCUUUAAUCACACACG	-19.4	-16.64	32	-14.0188	0.128	0	-5.68868	0
AGAAGCCCCTCCTC	GAGGUAUCGCUUCU	-11.1	-9.57	4	-5.0096	0.016	0	-1.86292	0
GATGCTGTCAGTGATGAATGGTGAGATGGAAGATTGTCAGTCAATTGATTAAACC	UGUUUAUUUAUACCUGAUAAUGCUGCUUUAAUCACACACGAGGUAUC	-22.5	-11.75	65	-18.9016	0.26	7	-3.81336	0.028
AGATACTGAGAGATTGGTGATTTATATAAGGTAA	CUGCUUUAAUCACACACGAGGUAUCG	-14.5	-10.56	44	-10.8872	0.176	4	-4.022	0.016
CAGAGGCAAGAACCT	AGGUAUCGCUUCUA	-10	-9.69	6	-4.5696	0.024	4	-4.0588	0.016
TGCCTTATCTCCAGAGATCCAGAGAGTC	UGCUGCUUUAAUCACACACGAGGUAUCGCU	-11.4	-6.22	87	-10.4116	0.348	42	-4.0066	0.168
CTGGGACAGGTCTCTTTGTCAGTGAACAAGGGCGTC	AAUGCUGCUUUAAUCACACACGAGGUAUCGCUUCUAC	-18.8	-10.04	36	-13.916	0.144	14	-5.0486	0.056
GGCCTCGGGCAGAGGGGGCAGCAGCAGAAAACCAAACAAA	AUUGUUUAUUUAUACCUGAUAAUGCUGCUUUAAUCACACACGAGGUA	-25.4	-14.35	4	-14.372	0.016	2	-4.9996	0.008
AGGGGGCAGTTTTGGTGGAAGAAGCTCGGGC	ACCUGAUAAUGCUGCUUUAAUCACACACGAGGUAUCGCUUCUA	-20.8	-12.5	12	-13.5188	0.048	7	-5.7566	0.028
GGAGAGAGAGCGAGGAGTTGTCAGGAAAGCTGCAGG	AUUGUUUAUUUAUACCUGAUAAUGCUGCUUUAAUCA	-19.4	-15.33	5	-11.1084	0.02	0	-5.20868	0
CATTTTGTGTTGTGATATTTAAGTTATTAAGCAC	AUGCUGCUUUAAUCACACACGAGGUA	-18.2	-12.79	19	-11.186	0.076	1	-4.89548	0.004
AGAGAAAGGACGGCG	UGCUGCUUUAAUCA	-9.9	-10.2	4	-3.8392	0.016	0	-3.53244	0
ATGGTGCGTTTGAGCGTCAGT	CCUGAUAAUGCUGCUUUAAUCACACAC	-10.9	-6.79	31	-6.7104	0.124	51	-4.77888	0.204
AAGAAGATATCTAAGAAAGGTCAGAAGAAAAAAGGTCAGTGAACT	UGUUUAUUUAUACCUGAUAAUGCUGCUUUAAUCACACACGAGGUAUCGCUUCUA	-19.3	-13.96	83	-17.822	0.332	4	-5.77472	0.016
CAAGCCCAGACCTCC	CGAGGUAUCGCUUC	-10.9	-8.84	4	-5.1496	0.016	3	-2.67852	0.012
GGCATGTCAGGTCGGGGACTTGGACAG	UUGUUUAUUUAUACCUGAUAAUGCUG	-17.7	-10.57	0	-7.2688	0	1	-3.5674	0.004
AGAGATAGTTGCACTAAGTAAATC	UGUUUAUUUAUACCUGAUAAUGCUGCUUUAAUCA	-8	-6.52	108	-7.8064	0.432	56	-4.7546	0.224
CGGCGGGGCGGAGTGCAGCGAGGC	ACCUGAUAAUGCUGCUUUAAUCACACACGAGGUAUCGCUU	-16.6	-9.8	7	-9.9596	0.028	10	-4.95364	0.04
CAAATACAGCCATGAAGAAAAAGGTGCT	ACACUACAUAUUUAUUGUUUAUUUA	-7.6	-6.42	63	-5.8636	0.252	11	-2.50388	0.044
CGGAAGGTTCTTCTGTTGGCTTAGCT	UGCUUUAAUCACACACGAGGUAUCGCUUCUA	-13.4	-6.09	39	-10.3144	0.156	49	-4.26716	0.196
TGTAAAGGATGAGCCGTGTGCTGC	ACACUACAUAUUUAUUGUUUAUU	-10.7	-8.86	6	-4.6252	0.024	1	-2.34332	0.004
AGATCTGAAGTAAGCAA	AUGCUGCUUUAAUCA	-10.9	-11.49	10	-4.7452	0.04	3	-4.03664	0.012
AAAGGTCTGTGTTATTT	UGAUAAUGCUGCUUUA	-8.5	-8.75	26	-4.6556	0.104	14	-4.00596	0.056
GAGTCGAAGGACGGGCCCCGTA	CACGAGGUAUCGCUUCUACUA	-13.6	-7.65	6	-8.134	0.024	11	-3.03576	0.044
CAGAGGCTTTGCATTGAC	ACGAGGUAUCGCUUCUA	-11.9	-8.3	6	-6.534	0.024	4	-2.25188	0.016
TAGTAGTCGGATGCTTGGCACGTTGTCCTGTAA	AUACCUGAUAAUGCUGCUUUAAUCACACACGAGGUAUCGCUUCUACUA	-23.7	-15.05	4	-14.0744	0.016	0	-5.54828	0
CAGTCCAACGAGATCACCATCCCTGTCACCTTCGAGTCGC	GCUGCUUUAAUCACACACGAGGUAUCGCUUCUACUA	-7.5	-5.93	244	-15.4724	0.976	76	-5.03328	0.304
GAGAAGAAATTTGCATGCCCCATGTGTGACCGGCGGTTCATGAGGAGTGAC	UUUAUACCUGAUAAUGCUGCUUUAAUCACACACGAGGUAUCGCUUCUACUA	-31.4	-17.21	11	-19.9408	0.044	1	-5.63972	0.004
CAGTGACACACCAGAAAGTGAAGAGTCAGA	GCUGCUUUAAUCACACACGAGGUAUCGCUU	-15	-8.99	40	-10.9556	0.16	11	-4.0512	0.044
AAGAGGAAGTGATACTGGAAATGTGAACTGTGCCACAT	AAUGCUGCUUUAAUCACACACGAGGUAUCGCUUCUACUA	-25.9	-18.91	5	-14.6528	0.02	1	-5.41212	0.004
AGGAGCATGCCACAGGAAAGACCAAGGGATCATTTGTTCAGA	CCUGAUAAUGCUGCUUUAAUCACACACGAGGUAUCGCUUCUA	-20.7	-11.05	53	-16.8688	0.212	18	-5.75316	0.072
ATGGGAGAGAGCCGTCGTGTGTGCAGGGGTGCAT	AUGCUGCUUUAAUCACACACGAGGUAUCGCUUCUAC	-30.6	-21.66	0	-13.3116	0	0	-5.27288	0
AGTCTGAGCCTGAAGAGCCCCAAAGCAGGA	ACCUGAUAAUGCUGCUUUAAUCACACA	-13.4	-9.49	38	-9.1984	0.152	15	-4.849	0.06
GAGGGCTGCGTGGATTCTTGTG	UACCUGAUAAUGCUGUUUUA	-7.8	-7.17	80	-6.4452	0.32	35	-4.48036	0.14
AGAGGTTTTGTATTGAGGGCCAGTGATGATGA	ACAUAUUUAUUGUUUAUUUAUACCUGAUAAUGCUGCUUUA	-15	-8.48	43	-10.46	0.172	28	-4.8696	0.112
GGCGCCAGCTCTGTAGACGTGCGCATGATCGA	CUGAUAAUGCUGCUUUAAUCACACACGAGGUAUCGCUU	-17.1	-8.19	29	-11.9392	0.116	22	-4.76048	0.088
AGTGAGGAGAGTGGGGAGTGAGCT	UGUUUAUUUAUACCUGAUAAUGCUGCUUUAAUCACA	-15.8	-14.97	8	-7.9596	0.032	2	-4.88244	0.008
GATCAGGAAGAAATGGAGGAAGAAG	AUUUAUUGUUUAUUUAUACCUGAUA	-13.9	-14	1	-6.0016	0.004	0	-3.39272	0
AGATCTGAAGAGCTATTGTATAAG	UUUAUACCUGAUAAUGCUGCUUUAAUCA	-11.8	-11.74	27	-7.7252	0.108	4	-4.94436	0.016
GAGGAAGCTAGGTTGACTCTCAAGGC	ACCUGAUAAUGCUGCUUUAAUCA	-9.9	-6.29	67	-7.6824	0.268	66	-4.82044	0.264
TAGCAGCCAGAACAGTAAACAC	UUGUUUAUUUAUACCUGAUAAUGCUGCUU	-14.6	-14.06	1	-6.5832	0.004	0	-4.17396	0
AGGAAGGAAGGCGTCGTGG	ACACGAGGUAUCGCUUCUA	-17.8	-14.73	0	-7.2676	0	0	-2.96136	0
TCAGACGAGGATGATCGGGGGGAGATGGCAGATTTTGGTGC	ACACUACAUAUUUAUUGUUUAUUUAUACCUGAUAAUGCUGCUUUA	-17.5	-13.31	51	-13.4604	0.204	1	-5.27804	0.004
TAGATGCACCTA	GAGGUAUCGCUUCUA	-8.3	-5.51	11	-4.602	0.044	11	-1.66424	0.044
CTGGTTGGACAGCAT	AUGCUGCUUUAAUCAC	-13	-12.16	0	-4.3924	0	0	-4.03472	0
AGAAGTATTCCTATTGCCGCCAGAAGATCCAAGAGGCC	UGCUGCUUUAAUCACACACGAGGUAUCGCUUCU	-12.9	-6.88	163	-14.8452	0.652	60	-5.16708	0.24
CGGAGCTGCATCGAAGA	CCUGAUAAUGCUGCUUUA	-10.2	-10.31	10	-5.2748	0.04	5	-4.6136	0.02
TGGCCGGGTGCCTACGTGGGGCCTCGGAAGGGAATGGATAGACGGG	AUUGUUUAUUUAUACCUGAUAAUGCUGCUUUAAUCACACACGAGGUAUCGCUU	-30.4	-12.61	2	-17.4644	0.008	5	-5.35432	0.02
TGCAGTTTTGCATCAGCTGTTTAACT	UGUUUAUUUAUACCUGAUAAUGCUGCU	-12	-8.21	44	-8.38	0.176	20	-4.58392	0.08
GGGTTTATACAGGGAGAGACTTCAATAAAT	AUUUAUUGUUUAUUUAUACCUGAUAAUGCUG	-12.5	-9.92	27	-8.0156	0.108	5	-3.32984	0.02
CTGAGAATCGGTGTGAATAGGAGTGGACTCAGA	CCUGAUAAUGCUGCUUUAAUCACACACGAGGUAUCGC	-22.6	-15.24	5	-12.7072	0.02	2	-5.51068	0.008
ATGGATGATTAAGATTGGAAGGGGGCT	UGCUGCUUUAAUCACACAC	-11.4	-12	40	-7.662	0.16	0	-0.55392	0
CGCTATTTATTATCGGGGAGTTTTTAAAGTACTGTAA	CUACAUAUUUAUUGUUUAUUUAUACCUGAUAAUGCUGCU	-14.5	-13.12	65	-11.5448	0.26	2	-4.42436	0.008
AGTGCACAGATGAGGAGCCAGA	CCUGAUAAUGCUGCUUUAAUCACACACG	-10.6	-10.61	40	-7.2364	0.16	9	-4.91092	0.036
AGAAATCTCCACCAGAACCCCGAGTGGCGAAGAAACTGGGAATGAT	UUUAUACCUGAUAAUGCUGCUUUAAUCACACACGAGGUAUCG	-14.9	-4.48	139	-16.1484	0.556	83	-3.6146	0.332
AAGAGGCATGCTAAAAATAATTGAGGTTTTCATTATTCAGC	CCUGAUAAUGCUGCUUUAAUCACACACGAGGUAUCGCUUCUA	-22.9	-15.8	33	-16.6404	0.132	2	-5.97312	0.008
ACAGACAGATCC	UGAUAAUGCUGC	-4.6	-4.95	50	-2.95	0.2	41	-3.0024	0.164
CGGTAGCCGCGTGCAGAGGGGACAGAGCGTGCGCTGAGCAGG	CCUGAUAAUGCUGCUUUAAUCACACACGAGGUAUCG	-21.6	-12.17	20	-14.7468	0.08	1	-5.08248	0.004
ATGGGGAGGCGACGTGCTCT	CGAGGUAUCGCUUCUACUAA	-15.9	-9.79	0	-7.1776	0	2	-2.601	0.008
CTGGTGCCTCGAAATGTATCGGCCCCGGGTGC	AUACCUGAUAAUGCUGCUUUAAUCACACACGAGGUAUCGC	-22.3	-9.75	5	-12.3476	0.02	9	-3.74488	0.036
CGTGGTTGAGCTGGTCCCCGTGGTTGAATTGGAAGAGGCC	UGCUGCUUUAAUCACACACGAGGUAUCGCUUCUACU	-25.7	-18.21	7	-15.3412	0.028	0	-5.44036	0
CTGGAGACACAGCAGAAGATCAA	CUGAUAAUGCUGCUUUAA	-11.1	-9.59	27	-6.5768	0.108	12	-4.67848	0.048
TGGAGGCTCCATACCTAAGTCTGACCAGCTACGGAGAGCTTATCTGCCTGATGGAT	UGUUUAUUUAUACCUGAUAAUGCUGCUUUAAUCACACACGAGGUAUCGCUUCUA	-24.2	-10.53	81	-21.7368	0.324	20	-6.04224	0.08
AGAGAAAGTCAGTGTTATCCAGGACTTTGTGAAA	GUUUAUUUAUACCUGAUAAUGCUGCUUUAAUCA	-20.2	-15.42	4	-10.604	0.016	0	-5.12992	0
TGTGTGTGCTGGGAGAGTCAGAGTGGATGTAGAGCGCGGTT	UAUUGUUUAUUUAUACCUGAUAAUGCUGCUUUAAUCACACACG	-22.2	-14.08	11	-13.4272	0.044	2	-5.439	0.008
CATTGGAATGGCCAAAAGGGAGATAAACAAA	AUUGUUUAUUUAUACCUGAUAAUGCUGCUUUAAUC	-14.7	-12.1	26	-9.8112	0.104	4	-4.973	0.016
AGTTGACCAAGCTGCAG	AUGCUGCUUUAAUCACACA	-9	-8.43	24	-4.7968	0.096	16	-4.1454	0.064
AAAAGAGCGTCAAGGC	ACCUGAUAAUGCUGCUUUA	-10.1	-9.88	18	-4.9104	0.072	11	-4.49472	0.044
AGTCTGGAAAGCAGCATGGTTT	UACCUGAUAAUGCUGCUUUAAUCACACA	-16.6	-14.94	2	-7.72	0.008	0	-5.15288	0
CGATAAAGTAGAAAGTTGGAGTCAAACACTGGATGC	AUAUUUAUUGUUUAUUUAUACCUGAUAAUGCUGCUUUAAUCA	-14.2	-11.44	63	-11.3072	0.252	5	-4.75196	0.02
AATCTTGTGCATGATACCCCACGTAAAATCC	UGAUAAUGCUGCUUUAAUCACACACGAGGUA	-14.1	-11.73	44	-10.4516	0.176	3	-4.89688	0.012
AGCATGCTACAATGTTTGGACAAGGCAGTT	UGCUGCUUUAAUCACACACGAGGUAUCGCUU	-18.2	-11.98	9	-11.2884	0.036	5	-4.47312	0.02
AAGAAGCATGATCTCGGTA	CACACGAGGUAUCGCUUCUA	-17.2	-14.17	0	-7.0528	0	0	-2.56812	0
TAGTGGGAACAGTGATACG	GGUAUCGCUUCUACUA	-16	-14.68	0	-5.4204	0	0	-4.017	0
TGTGGGACCTTGGCCAGAGTGGGGAGGGCGGCCAGCAGCTCTGAGGAAC	GUUUAUUUAUACCUGAUAAUGCUGCUUUAAUCACACACGAGGUAUCGCU	-27.9	-13.25	9	-17.8668	0.036	1	-5.05256	0.004
TGAAGATCTCCTTTGCCAAGAAGTAGCA	UGCUGCUUUAAUCACACACGAGGUAUCGCUUCU	-16.6	-12.66	33	-11.9012	0.132	3	-4.96948	0.012
GGGAGAGCGTGTGTGACGGCAAAATCGGA	CCUGAUAAUGCUGCUUUAAUCACACACGAGGUAUCGCUUCUA	-26.7	-19.72	0	-12.3996	0	0	-4.93032	0
AGAGCGAAACTTATCTCGA	ACGAGGUAUCGCUUC	-15.3	-11.72	0	-6.1372	0	0	-2.63632	0
TCAGCATTTGTCCCTGGC	ACCUGAUAAUGCUGC	-11.2	-11.23	3	-5.0488	0.012	1	-4.15104	0.004
TGGAACTTTGCACATGTCACTACGGGGGAGTT	UAUUUAUACCUGAUAAUGCUGCUUUAAUCACAC	-8.4	-7.64	156	-10.0052	0.624	48	-5.28408	0.192
ACGGAACATTGAATTGATTTGCCAGGAGAATGAGGGGGAAAACGAC	AUUGUUUAUUUAUACCUGAUAAUGCUGCUUUAAUCACACACGAGGUAUCGC	-15.1	-8.93	151	-16.7532	0.604	17	-4.68908	0.068
CTACCTCATAACCCTCAAGCCAGTTGAATCAA	CUGAUAAUGCUGCUUUAAUCACACACGAGGUAU	-14.9	-12.25	35	-11.1852	0.14	3	-5.021	0.012
GGGAGTCCCAGGATTAAAGGTGGAAGATGC	UUAUUUAUACCUGAUAAUGCUGCUUUA	-13.7	-11.35	47	-9.5848	0.188	5	-5.33148	0.02
CGAGGCCCTCAGAGAGCAGTTAGGGACTGCAGGC	ACCUGAUAAUGCUGCUUUAAUCACACACGAGGUAUCGCUUCU	-22.5	-10.89	12	-14.6352	0.048	26	-6.05692	0.104
ATAGAATTGAACCAAGAGGCATTATACATATAGATAC	UUAUUUAUACCUGAUAAUGCUGCUUUAAUCACACACGAGGUAUCGCUUCUAC	-20.6	-16.05	34	-15.1688	0.136	0	-5.423	0
AGTGATTGGAAAGAGCTTTAGG	CCUGAUAAUGCUGCUUUAAUCACA	-12.8	-14.2	8	-6.6992	0.032	1	-4.51896	0.004
CAGTGATTGCACTCTGTTGAGAGATAAGGTAGA	GCUGCUUUAAUCACACACGAGGUAUCGCUU	-20.8	-14.94	5	-11.77	0.02	0	-4.46744	0
