# Supplementary material for: Viral miRNA adaptor differentially recruits miRNAs to target mRNAs through alternative base-pairing
Source: eLife. 2019 Sep 20;8:e50530. doi: 10.7554/eLife.50530 (PMC6763288; doi:10.7554/eLife.50530)
Supplement: Figure 3—source data 1. [file elife-50530-fig3-data1.xlsx]

## Sheet: Sheet1
	Two million U937 cells expressing LUC reporters were nucleofected with 3 µg of GFP-DHSUR2 or GFP-HSUR2 plasmids per transfection using Amaxa's kit V and program T-020 and grown at 37°C/5% CO2 for 18-21 hours.
	Cells were harvested and 30,000 GFP+, DAPI- cells were collected by FACS into 0.5 ml of complete media containing 4 µg/ml puromycin using a narrow, high-expressing GFP window and incubated for one hour at 37°C/5% CO2.
	Cells were sedimented at 1000 x g for 20 min and the media was removed completely by aspiration. Cells were lysed with 50 µl of 1X passive lysis buffer for 15 min at room temperature and gently vortexed
	prior to aliquoting 10 µl of lysate in triplicate per well of a 96-well plate, and analyzed for firefly luciferase activity using 50 µl of luciferase II substrate reagent (Promega). Luminescence in each well was measured in a Veritas
	microplate luminometer (Turner Biosystems) equipped with Glomax v1.9.3 software using an integration time of 5 s. Immediately after, 50 µl of Stop & Glo™ reagent (Promega) was added to each well and Renilla luciferase activity
	was measured as described above. Normalized light units (NLU) were obtained by dividing the firefly luciferase relative light units (RLU) by the corresponding Renilla RLU of each well. The relative luciferase activity was then calculated
	by dividing the NLU of each sample by the average NLU of the control sample (+DHSUR2), set as 1.0.
	Experiment_1
	Firefly_LUC	1	2	3		4	5	6	7	8	9	10	11	12
A		X	X	X	YTHDC1+DHSUR2	470807	433154	417148	X	X	X	X	X	X	A
B		X	X	X	YTHDC1+HSUR2	628909	645256	574029	X	X	X	X	X	X	B
C		X	X	X	YTHDC1+HSURD142-3p	512022	499850	495454	X	X	X	X	X	X	C
D		X	X	X	X	X	X	X	X	X	X	X	X	X	D
E		X	X	X	X	X	X	X	X	X	X	X	X	X	E			2
F		X	X	X	X	X	X	X	X	X	X	X	X	X	F			1
G		X	X	X	X	X	X	X	X	X	X	X	X	X	G			0
H		X	X	X	X	X	X	X	X	X	X	X	X	X	H
	Renilla_LUC
A		X	X	X	YTHDC1+DHSUR2	551396	486080	462510	X	X	X	X	X	X	A
B		X	X	X	YTHDC1+HSUR2	1046969	1095513	957668	X	X	X	X	X	X	B
C		X	X	X	YTHDC1+HSURD142-3p	590897	562441	540051	X	X	X	X	X	X	C
D		X	X	X	X	X	X	X	X	X	X	X	X	X	D
E		X	X	X	X	X	X	X	X	X	X	X	X	X	E			2
F		X	X	X	X	X	X	X	X	X	X	X	X	X	F			1
G		X	X	X	X	X	X	X	X	X	X	X	X	X	G			0
H		X	X	X	X	X	X	X	X	X	X	X	X	X	H
	Firefly/Renilla Ratio
A		X	X	X	YTHDC1+HSUR2	0.853846	0.891117	0.901922	X	X	X	X	X	X	A
B		X	X	X	YTHDC1+DHSUR2	0.600695	0.588999	0.599403	X	X	X	X	X	X	B
C		X	X	X	YTHDC1+HSURD142-3p	0.866516	0.888715	0.917421	X	X	X	X	X	X	C
D		X	X	X	X	X	X	X	X	X	X	X	X	X	D
E		X	X	X	X	X	X	X	X	X	X	X	X	X	E
F		X	X	X	X	X	X	X	X	X	X	X	X	X	F
G		X	X	X	X	X	X	X	X	X	X	X	X	X	G
H		X	X	X	X	X	X	X	X	X	X	X	X	X	H
	Mean Ratios
	YTHDC1+HSUR2	0.882295
	YTHDC1+DHSUR2	0.596366
	YTHDC1+HSURD142-3p	0.890884
	Relative LUC Activity				Mean
	YTHDC1+HSUR2	0.967755	1.01	1.02225	1
	YTHDC1+DHSUR2	0.680833	0.667576	0.679368	0.675926
	YTHDC1+HSURD142-3p	0.982117	1.00728	1.03981	1.00974
	Experiment_2
	Firefly Luciferase	1	2	3	4	5	6	7	8	9	10	11	12
A	control + DHSUR2-1	X	X	X	X	X	X	X	X	473325	477680	491797	X		A
B	control + HSUR2-1	X	X	X	X	X	X	X	X	537816	508669	525932	X		B
C	CD69 + DHSUR2-1	X	X	X	X	X	X	X	X	60669	59408	59853	X		C
D	CD69 + HSUR2-1	X	X	X	X	X	X	X	X	49699	47328	48476	X		D
E	CD69 + DHSUR2-2	X	X	X	X	X	X	X	X	71517	69328	70660	X		E
F	CD69 + HSUR2-2	X	X	X	X	X	X	X	X	54336	51733	53210	X		F
G		X	X	X	X	X	X	X	X	X	X	X	X		G
H		X	X	X	X	X	X	X	X	X	X	X	X		H
	Renilla Luciferase
A	control + DHSUR2-1	X	X	X	X	X	X	X	X	7710831	7981078	8019520	X		A
B	control + HSUR2-1	X	X	X	X	X	X	X	X	8971945	8463114	8787681	X		B
C	CD69 + DHSUR2-1	X	X	X	X	X	X	X	X	3908244	3689030	3808767	X		C
D	CD69 + HSUR2-1	X	X	X	X	X	X	X	X	3839153	3861561	3875932	X		D
E	CD69 + DHSUR2-2	X	X	X	X	X	X	X	X	3017818	2877315	2960010	X		E
F	CD69 + HSUR2-2	X	X	X	X	X	X	X	X	3605059	3584346	3605085	X		F
G		X	X	X	X	X	X	X	X	X	X	X	X		G
H		X	X	X	X	X	X	X	X	X	X	X	X		H
	FF/R Ratios													Mean
A	control + DHSUR2-1	X	X	X	X	X	X	X	X	0.0613844	0.0598516	0.061325	X	0.0608537	A
B	control + HSUR2-1	X	X	X	X	X	X	X	X	0.0599442	0.0601042	0.0598488	X	0.0599657	B
C	CD69 + DHSUR2-1	X	X	X	X	X	X	X	X	0.0155233	0.016104	0.0157145	X	0.0157806	C
D	CD69 + HSUR2-1	X	X	X	X	X	X	X	X	0.0129453	0.0122562	0.0125069	X	0.0125695	D
E	CD69 + DHSUR2-2	X	X	X	X	X	X	X	X	0.0236982	0.0240947	0.0238715	X	0.0238882	E
F	CD69 + HSUR2-2	X	X	X	X	X	X	X	X	0.0150722	0.014433	0.0147597	X	0.014755	F
G		X	X	X	X	X	X	X	X	X	X	X	X		G
H		X	X	X	X	X	X	X	X	X	X	X	X		H
	Relative LUC Activity													Mean
A	control + DHSUR2-1									1.00872	0.983533	1.00775		1
B	control + HSUR2-1									0.985055	0.987685	0.983487		0.985409
C	CD69 + DHSUR2-1									0.983697	1.02049	0.995813		1
D	CD69 + HSUR2-1									0.82033	0.776661	0.79255		0.796514
E	CD69 + DHSUR2-2									0.99205	1.00865	0.999304		1
F	CD69 + HSUR2-2									0.630947	0.604192	0.617867		0.617669
G
H
	Experiment_3
	1	2	3	4	5	6	7	8	9	10	11	12
A	X	X	X	X	X	X	X	X	X	X	X	X	A
B	X	X	X	X	X	X	X	X	X	X	X	X	B
C	X	X	X	X	X	X	X	X	X	X	X	X	C
D	X	X	X	X	X	X	X	X	X	X	X	X	D
E	X	X	X	X	X	X	X	X	X	X	X	X	E
F	60463	58278	62393	57910	62348	62313	62626	67405	66602	X	X	X	F
G	71158	69666	71439	50534	52994	53473	56774	60050	59040	X	X	X	G
H	X	X	X	X	X	X	X	X	X	X	X	X	H
A	X	X	X	X	X	X	X	X	X	X	X	X	A
B	X	X	X	X	X	X	X	X	X	X	X	X	B
C	X	X	X	X	X	X	X	X	X	X	X	X	C
D	X	X	X	X	X	X	X	X	X	X	X	X	D
E	X	X	X	X	X	X	X	X	X	X	X	X	E
F	680744	658762	695398	621588	660138	661469	697106	739569	736120	X	X	X	F
G	1000808	955851	959160	663884	673204	669371	758806	773585	741462	X	X	X	G
H	X	X	X	X	X	X	X	X	X	X	X	X	H
A	X	X	X	X	X	X	X	X	X	X	X	X	A
B	X	X	X	X	X	X	X	X	X	X	X	X	B
C	X	X	X	X	X	X	X	X	X	X	X	X	C
D	X	X	X	X	X	X	X	X	X	X	X	X	D
E	X	X	X	X	X	X	X	X	X	X	X	X	E
F	0.088819	0.0884659	0.0897227	0.0931646	0.0944469	0.094204	0.0898371	0.0911409	0.0904771	X	X	X	F
G	0.0711006	0.0728837	0.0744808	0.0761187	0.0787191	0.0798854	0.0748202	0.0776256	0.0796265	X	X	X	G
H	X	X	X	X	X	X	X	X	X	X	X	X	H
A	X	X	X	X	X	X	X	X	X	X	X	X
B	X	X	X	X	X	X	X	X	X	X	X	X
C	X	X	X	X	X	X	X	X	X	X	X	X
D	X	X	X	X	X	X	X	X	X	X	X	X
E	X	X	X	X	X	X	X	X	X	X	X	X
F	0.0890026			0.0939385			0.090485			X	X	X
G	0.0728217			0.0782411			0.0773574			X	X	X
H	X	X	X	X	X	X	X	X	X	X	X	X
A	X	X	X	X	X	X	X	X	X	X	X	X
B	X	X	X	X	X	X	X	X	X	X	X	X
C	X	X	X	X	X	X	X	X	X	X	X	X
D	X	X	X	X	X	X	X	X	X	X	X	X
E	X	X	X	X	X	X	X	X	X	X	X
F	1			1			1			X	X	YTHDC1 + DHSUR2_Mean
G	0.818198			0.832897			0.854919			X	X	YTHDC1 + HSUR2_Mean
H	X	X	X	X	X	X	X	X	X	X	X	X
	Experiment_4
	Firefly Luciferase	1	2	3		4	5	6	7	8	9	10	11	12
A	CD69+DHSUR2-3	153014	152186	152303		X	X	X	X	X	X	X	X	X	A
B	CD69+DHSUR2-4	139744	140854	140923		X	X	X	X	X	X	X	X	X	B
C		X	X	X	X	X	X	X	X	X	X	X	X	X	C
D	CD69+HSUR2-3	120799	124152	122961		X	X	X	X	X	X	X	X	X	D
E	CD69+HSUR2-4	136105	137117	131822		X	X	X	X	X	X	X	X	X	E
F		X	X	X	X	X	X	X	X	X	X	X	X	X	F
G	control+DHSUR2-2	1008518	989326	1038187		X	X	X	X	X	X	X	X	X	G
H	control+HSUR2-2	892379	903928	897944		X	X	X	X	X	X	X	X	X	H
	Renilla Luciferase
A	CD69+DHSUR2-3	5858416	5874009	5814042		X	X	X	X	X	X	X	X	X	A
B	CD69+DHSUR2-4	5735798	5855802	5795761		X	X	X	X	X	X	X	X	X	B
C		X	X	X	X	X	X	X	X	X	X	X	X	X	C
D	CD69+HSUR2-3	7565601	8110584	7515667		X	X	X	X	X	X	X	X	X	D
E	CD69+HSUR2-4	6751194	6797076	6439343		X	X	X	X	X	X	X	X	X	E
F		X	X	X	X	X	X	X	X	X	X	X	X	X	F
G	control+DHSUR2-2	6093782	5989839	6274808		X	X	X	X	X	X	X	X	X	G
H	control+HSUR2-2	5227067	5338275	5254470		X	X	X	X	X	X	X	X	X	H
	FF/R Ratios				Mean
A	CD69+DHSUR2-3	0.0261187	0.0259084	0.0261957	0.0260743	X	X	X	X	X	X	X	X	X	A
B	CD69+DHSUR2-4	0.0243635	0.0240538	0.0243148	0.024244	X	X	X	X	X	X	X	X	X	B
C		X	X	X	X	X	X	X	X	X	X	X	X	X	C
D	CD69+HSUR2-3	0.0159669	0.0153074	0.0163606	0.0158783	X	X	X	X	X	X	X	X	X	D
E	CD69+HSUR2-4	0.0201601	0.0201729	0.0204713	0.0202681	X	X	X	X	X	X	X	X	X	E
F		X	X	X	X	X	X	X	X	X	X	X	X	X	F
G	control+DHSUR2-2	0.1655	0.165167	0.165453	0.165373	X	X	X	X	X	X	X	X	X	G
H	control+HSUR2-2	0.170723	0.16933	0.170891	0.170315	X	X	X	X	X	X	X	X	X	H
	Relative LUC Activity				Mean
A	CD69+DHSUR2-3	1.0017	0.993638	1.00466	1	X	X	X	X	X	X	X	X	X	A
B	CD69+DHSUR2-4	1.00493	0.992152	1.00292	1	X	X	X	X	X	X	X	X	X	B
C		X	X	X	X	X	X	X	X	X	X	X	X	X	C
D	CD69+HSUR2-3	0.612362	0.58707	0.627463	0.608965	X	X	X	X	X	X	X	X	X	D
E	CD69+HSUR2-4	0.831551	0.832079	0.844387	0.836006	X	X	X	X	X	X	X	X	X	E
F		X	X	X	X	X	X	X	X	X	X	X	X	X	F
G	control+DHSUR2-2	1.00076	0.998754	1.00048	1	X	X	X	X	X	X	X	X	X	G
H	control+HSUR2-2	1.03235	1.02392	1.03337	1.02988	X	X	X	X	X	X	X	X	X	H
	Experiment_5
	1	2	3	4	5	6	7	8	9	10	11	12
A	293656	284053	289100	318253	337668	330290	507402	508765	525813	257587	269574	276781	A	TP53RK + DHSUR2
B	141045	139553	139840	227556	244200	236220	256221	265776	262660	192112	191984	208660	B	TP53RK + HSUR2
C	159521	172588	167150	161746	169408	172483	168851	182356	184027	X	X	X	C	TP53RK + DHSUR2
D	128296	135807	133011	122813	132650	133665	107842	117112	112962	X	X	X	D	TP53RK + HSUR2
E	X	X	X	X	X	X	X	X	X	X	X	X	E
F	X	X	X	X	X	X	X	X	X	X	X	X	F
G	X	X	X	X	X	X	X	X	X	X	X	X	G
H	X	X	X	X	X	X	X	X	X	X	X	X	H
A	503001	500517	496627	745299	795330	768954	893259	927935	912047	563219	559472	596425	A	TP53RK + DHSUR2
B	1277002	1215305	1218339	1367985	1446103	1394465	2236441	2208756	2271211	989548	1025257	1040317	B	TP53RK + HSUR2
C	623988	661427	635233	621815	673989	659400	498544	535067	502118	X	X	X	C	TP53RK + DHSUR2
D	751861	788238	750632	729851	778848	812208	771190	805074	796428	X	X	X	D	TP53RK + HSUR2
E	X	X	X	X	X	X	X	X	X	X	X	X	E
F	X	X	X	X	X	X	X	X	X	X	X	X	F
G	X	X	X	X	X	X	X	X	X	X	X	X	G
H	X	X	X	X	X	X	X	X	X	X	X	X	H
A	0.583808	0.567519	0.582127	0.427014	0.424563	0.429532	0.568035	0.548277	0.57652	0.457348	0.481836	0.464067	A	TP53RK + DHSUR2
B	0.11045	0.11483	0.114779	0.166344	0.168868	0.169398	0.114566	0.120328	0.115648	0.194141	0.187255	0.200573	B	TP53RK + HSUR2
C	0.255648	0.260933	0.263132	0.260119	0.251351	0.261576	0.338688	0.34081	0.366501	X	X	X	C	TP53RK + DHSUR2
D	0.170638	0.172292	0.177199	0.168271	0.170316	0.16457	0.139838	0.145467	0.141836	X	X	X	D	TP53RK + HSUR2
E	X	X	X	X	X	X	X	X	X	X	X	X	E
F	X	X	X	X	X	X	X	X	X	X	X	X	F
G	X	X	X	X	X	X	X	X	X	X	X	X	G
H	X	X	X	X	X	X	X	X	X	X	X	X	H
A	0.577818			0.427036			0.564277			0.46775			A	TP53RK + DHSUR2
B	0.113353			0.168203			0.116847			0.19399			B	TP53RK + HSUR2
C	0.259904			0.257682			0.348666	X	X	X	X	X	C	TP53RK + DHSUR2
D	0.173376			0.167719			0.142381	X	X	X	X	X	D	TP53RK + HSUR2
E	X	X	X	X	X	X	X	X	X	X	X	X	E
F	X	X	X	X	X	X	X	X	X	X	X	X	F
G	X	X	X	X	X	X	X	X	X	X	X	X	G
H	X	X	X	X	X	X	X	X	X	X	X	X	H
A	1			1			1			1			A	TP53RK + DHSUR2
B	0.196174			0.393885			0.207075			0.414729			B	TP53RK + HSUR2
C	1			1			1	X	X	X	X	X	C	TP53RK + DHSUR2
D	0.667078			0.650876			0.408357	X	X	X	X	X	D	TP53RK + HSUR2
E	X	X	X	X	X	X	X	X	X	X	X	X	E
F	X	X	X	X	X	X	X	X	X	X	X	X	F
G	X	X	X	X	X	X	X	X	X	X	X	X	G
H	X	X	X	X	X	X	X	X	X	X	X	X	H
	Experiment_6
	1	2	3	Firefly Luciferase	4	5	6		7	8	9	10	11	12
A	X	X	X		X	X	X		X	X	X	X	X	X
B	X	X	X		X	X	X		X	X	X	X	X	X
C	X	X	X		X	X	X		X	X	X	X	X	X
D	X	X	X	control+DHSUR2-3	482862	474206	462193		X	X	X	X	X	X
E	X	X	X	control+DHSUR2-4	476207	461314	445474		X	X	X	X	X	X
F	X	X	X	control+HSUR2-3	399292	423387	418362		X	X	X	X	X	X
G	X	X	X	control+HSUR2-4	334208	343691	341764		X	X	X	X	X	X
H	X	X	X		X	X	X		X	X	X	X	X	X
				Renilla Luciferase
A	X	X	X		X	X	X		X	X	X	X	X	X
B	X	X	X		X	X	X		X	X	X	X	X	X
C	X	X	X		X	X	X		X	X	X	X	X	X
D	X	X	X	control+DHSUR2-3	2342353	2438368	2403271		X	X	X	X	X	X
E	X	X	X	control+DHSUR2-4	2197831	2156339	2114892		X	X	X	X	X	X
F	X	X	X	control+HSUR2-3	1953197	2075826	2075597		X	X	X	X	X	X
G	X	X	X	control+HSUR2-4	1592809	1676844	1669210		X	X	X	X	X	X
H	X	X	X		X	X	X		X	X	X	X	X	X
				FF/R Ratios				Mean
A	X	X	X		X	X	X		X	X	X	X	X	X
B	X	X	X		X	X	X		X	X	X	X	X	X
C	X	X	X		X	X	X		X	X	X	X	X	X
D	X	X	X	control+DHSUR2-3	0.206144	0.194477	0.192318	0.197646	X	X	X	X	X	X
E	X	X	X	control+DHSUR2-4	0.216671	0.213934	0.210637	0.213747	X	X	X	X	X	X
F	X	X	X	control+HSUR2-3	0.20443	0.203961	0.201562	0.203318	X	X	X	X	X	X
G	X	X	X	control+HSUR2-4	0.209823	0.204963	0.204746	0.206511	X	X	X	X	X	X
H	X	X	X		X	X	X		X	X	X	X	X	X
				Relative LUC Activity				Mean
A	X	X	X		X	X	X		X	X	X	X	X	X
B	X	X	X		X	X	X		X	X	X	X	X	X
C	X	X	X		X	X	X		X	X	X	X	X	X
D	X	X	X	control+DHSUR2-3	1.04299	0.983963	0.973042	1	X	X	X	X	X	X
E	X	X	X	control+DHSUR2-4	1.01368	1.00087	0.985447	1	X	X	X	X	X	X
F	X	X	X	control+HSUR2-3	1.03432	1.03195	1.01981	1.02869	X	X	X	X	X	X
G	X	X	X	control+HSUR2-4	0.98164	0.958903	0.957888	0.966144	X	X	X	X	X	X
H	X	X	X		X	X	X		X	X	X	X	X	X
	Experiment_7
	Firefly Luciferase	1	2	3	4	5	6	7	8	9	10	11	12
A	MGA + DHSUR2	12280	12479	12145	15465	16833	16910	33376	34815	34239	22487	23056	23677
B	MGA + HSUR2	13098	13015	12739	16389	18111	18029	36259	37283	36693	18880	19439	17958
C	MGA + DHSUR2	97291	103844	109016	83177	90153	88670	123260	131513	132167	X	X	X
D	MGA + HSUR2	71872	78296	77809	71284	75673	76471	114420	123921	124798	X	X	X
E		X	X	X	X	X	X	X	X	X	X	X	X
F		X	X	X	X	X	X	X	X	X	X	X	X
G		X	X	X	X	X	X	X	X	X	X	X	X
H		X	X	X	X	X	X	X	X	X	X	X	X
	Renilla Luciferase
A	MGA + DHSUR2	88021	90601	87643	101388	109164	108046	282713	294911	287464	169124	173075	174744
B	MGA + HSUR2	111732	110943	106473	127667	139008	137651	356208	362883	352302	179733	184117	171114
C	MGA + DHSUR2	1015978	1094308	1064688	962654	1008703	1017728	1763233	1898380	1925215	X	X	X
D	MGA + HSUR2	1254318	1370903	1392071	1050907	1133154	1091935	1794864	1901621	1854589	X	X	X
E		X	X	X	X	X	X	X	X	X	X	X	X
F		X	X	X	X	X	X	X	X	X	X	X	X
G		X	X	X	X	X	X	X	X	X	X	X	X
H		X	X	X	X	X	X	X	X	X	X	X	X
	FF/R Ratios
A	MGA + DHSUR2	0.139512	0.137736	0.138574	0.152533	0.154199	0.156507	0.118056	0.118053	0.119107	0.132962	0.133214	0.135495
B	MGA + HSUR2	0.117227	0.117312	0.119645	0.128373	0.130287	0.130976	0.101792	0.102741	0.104152	0.105045	0.10558	0.104948
C	MGA + DHSUR2	0.0957609	0.0948947	0.102392	0.0864038	0.0893752	0.0871254	0.0699057	0.0692764	0.0686505	X	X	X
D	MGA + HSUR2	0.0572997	0.0571127	0.0558944	0.0678309	0.0667809	0.0700326	0.0637486	0.065166	0.0672915	X	X	X
E		X	X	X	X	X	X	X	X	X	X	X	X
F		X	X	X	X	X	X	X	X	X	X	X	X
G		X	X	X	X	X	X	X	X	X	X	X	X
H		X	X	X	X	X	X	X	X	X	X	X	X
	Mean
A	MGA + DHSUR2	0.138607			0.154413			0.118405			0.13389
B	MGA + HSUR2	0.118062			0.129879			0.102895			0.105167
C	MGA + DHSUR2	0.0976827			0.0876348			0.0692775	X	X	X	X	X
D	MGA + HSUR2	0.0567689			0.0682148			0.065402	X	X	X	X	X
E		X	X	X	X	X	X	X	X	X	X	X	X
F		X	X	X	X	X	X	X	X	X	X	X	X
G		X	X	X	X	X	X	X	X	X	X	X	X
H		X	X	X	X	X	X	X	X	X	X	X	X
	Relative LUC Activity
A	MGA + DHSUR2	1			1			1			1
B	MGA + HSUR2	0.851771			0.841113			0.869007			0.785453
C	MGA + DHSUR2	1			1			1	X	X	X	X	X
D	MGA + HSUR2	0.581157			0.778398			0.944058	X	X	X	X	X
E		X	X	X	X	X	X	X	X	X	X	X	X
F		X	X	X	X	X	X	X	X	X	X	X	X
G		X	X	X	X	X	X	X	X	X	X	X	X
H		X	X	X	X	X	X	X	X	X	X	X	X
	Experiment_8
	Firefly Luciferase	1	2	3	4	5	6	7	8	9	10	11	12
A		X	X	X	X	X	X	X	X	X	X	X	X	A
B		X	X	X	X	X	X	X	X	X	X	X	X	B
C		X	X	X	X	X	X	X	X	X	X	X	X	C
D		X	X	X	X	X	X	X	X	X	X	X	X	D
E		51341	48889	53719	73355	74974	79852	90952	95496	94732	149869	153309	155603	E
F		67429	71117	71783	93805	93707	106598	129097	140827	130024	193966	195219	209251	F
G		X	X	X	X	X	X	X	X	X	X	X	X	G
H		X	X	X	X	X	X	X	X	X	X	X	X	H
	Renilla Luciferase
A		X	X	X	X	X	X	X	X	X	X	X	X	A
B		X	X	X	X	X	X	X	X	X	X	X	X	B
C		X	X	X	X	X	X	X	X	X	X	X	X	C
D		X	X	X	X	X	X	X	X	X	X	X	X	D
E		294665	281060	309868	523106	533375	540916	314854	332234	328984	642017	654397	654206	E
F		579216	575741	562325	897631	884453	988172	587510	573784	562959	1091898	1064431	1095610	F
G		X	X	X	X	X	X	X	X	X	X	X	X	G
H		X	X	X	X	X	X	X	X	X	X	X	X	H
	FF/R Ratios
A		X	X	X	X	X	X	X	X	X	X	X	X	A
B		X	X	X	X	X	X	X	X	X	X	X	X	B
C		X	X	X	X	X	X	X	X	X	X	X	X	C
D		X	X	X	X	X	X	X	X	X	X	X	X	D
E		0.174235	0.173945	0.173361	0.14023	0.140565	0.147624	0.28887	0.287436	0.287953	0.233435	0.234275	0.23785	E
F		0.116414	0.123523	0.127654	0.104503	0.105949	0.107874	0.2397	0.22586	0.230965	0.177641	0.183402	0.19099	F
G		X	X	X	X	X	X	X	X	X	X	X	X	G
H		X	X	X	X	X	X	X	X	X	X	X	X	H
	Mean
A		X	X	X	X	X	X	X	X	X	X	X	X	A
B		X	X	X	X	X	X	X	X	X	X	X	X	B
C		X	X	X	X	X	X	X	X	X	X	X	X	C
D		X	X	X	X	X	X	X	X	X	X	X	X	D
E		0.173847			0.142806			0.288087			0.235187			E
F		0.12253			0.106109			0.2322			0.184011			F
G		X	X	X	X	X	X	X	X	X	X	X	X	G
H		X	X	X	X	X	X	X	X	X	X	X	X	H
A		X	X	X	X	X	X	X	X	X	X	X	X	A
B		X	X	X	X	X	X	X	X	X	X	X	X	B
C	Relative LUC Activity													C
D		MGA_8			MGA_9			TP53RK_8			TP53RK_9			D
E	+ DHSUR2	1			1		+ DHSUR2	1			1			E
F	+ HSUR2	0.704816			0.743025		+ HSUR2	0.806			0.782405			F
G		X	X	X	X	X	X	X	X	X	X	X	X	G
H		X	X	X	X	X	X	X	X	X	X	X	X	H
	Experiment_9
	Firefly Luciferase
	1	2	3	4	5	6	7	8	9	10	11	12
A	101916	104477	107210	149894	164475	163795	144970	160181	161276	X	X	X	A	STK4 + DHSUR2
B	183074	178062	177621	165684	184199	184176	155726	170671	169095	X	X	X	B	STK4 + HSUR2
C	X	X	X	X	X	X	X	X	X	X	X	X	C
D	X	X	X	X	X	X	X	X	X	X	X	X	D
E	X	X	X	X	X	X	X	X	X	X	X	X	E
F	X	X	X	X	X	X	X	X	X	X	X	X	F
G	X	X	X	X	X	X	X	X	X	X	X	X	G
H	X	X	X	X	X	X	X	X	X	X	X	X	H
	Renilla Luciferase
A	930753	948546	955868	1330324	1418658	1401502	1499464	1597062	1567237	X	X	X	A	STK4 + DHSUR2
B	2177663	2154850	2098018	2058100	2221494	2170971	2032457	2375047	2310324	X	X	X	B	STK4 + HSUR2
C	X	X	X	X	X	X	X	X	X	X	X	X	C
D	X	X	X	X	X	X	X	X	X	X	X	X	D
E	X	X	X	X	X	X	X	X	X	X	X	X	E
F	X	X	X	X	X	X	X	X	X	X	X	X	F
G	X	X	X	X	X	X	X	X	X	X	X	X	G
H	X	X	X	X	X	X	X	X	X	X	X	X	H
	FF/R Ratios
A	0.109498	0.110144	0.11216	0.112675	0.115937	0.116871	0.0966812	0.100297	0.102905	X	X	X	A	STK4 + DHSUR2
B	0.084069	0.0826331	0.0846613	0.0805034	0.0829167	0.0848358	0.0766196	0.0718601	0.073191	X	X	X	B	STK4 + HSUR2
C	X	X	X	X	X	X	X	X	X	X	X	X	C
D	X	X	X	X	X	X	X	X	X	X	X	X	D
E	X	X	X	X	X	X	X	X	X	X	X	X	E
F	X	X	X	X	X	X	X	X	X	X	X	X	F
G	X	X	X	X	X	X	X	X	X	X	X	X	G
H	X	X	X	X	X	X	X	X	X	X	X	X	H
	Mean
A	0.110601			0.115161			0.0999611			X	X	X	A	STK4 + DHSUR2
B	0.0837878			0.082752			0.0738902			X	X	X	B	STK4 + HSUR2
C	X	X	X	X	X	X	X	X	X	X	X	X	C
D	X	X	X	X	X	X	X	X	X	X	X	X	D
E	X	X	X	X	X	X	X	X	X	X	X	X	E
F	X	X	X	X	X	X	X	X	X	X	X	X	F
G	X	X	X	X	X	X	X	X	X	X	X	X	G
H	X	X	X	X	X	X	X	X	X	X	X	X	H
	Relative LUC Activity
A	1			1			1			X	X	X	A	STK4 + DHSUR2
B	0.757569			0.718576			0.73919			X	X	X	B	STK4 + HSUR2
C	X	X	X	X	X	X	X	X	X	X	X	X	C
D	X	X	X	X	X	X	X	X	X	X	X	X	D
E	X	X	X	X	X	X	X	X	X	X	X	X	E
F	X	X	X	X	X	X	X	X	X	X	X	X	F
G	X	X	X	X	X	X	X	X	X	X	X	X	G
H	X	X	X	X	X	X	X	X	X	X	X	X	H
	Experiment_10
	Firefly Luciferase	2	3	4	5	6	7	8	9	10	11	12
A	X	X	X	X	X	X	X	X	X	X	X	X		A
B	X	X	X	X	X	X	X	X	X	X	X	X		B
C	X	X	X	X	X	X	X	X	X	X	X	X		C
D	X	X	X	X	X	X	X	X	X	X	X	X		D
E	X	X	X	X	X	X	X	X	X	X	X	X		E
F	X	X	X	X	X	X	X	X	X	X	X	X		F
G	154828	159280	159514	153287	156669	159611	147426	152330	157327	174592	191827	193307		G
H	180666	193394	187988	167646	184903	186947	186594	201360	202939	193218	208058	208745		H
	Renilla Luciferase
A	X	X	X	X	X	X	X	X	X	X	X	X		A
B	X	X	X	X	X	X	X	X	X	X	X	X		B
C	X	X	X	X	X	X	X	X	X	X	X	X		C
D	X	X	X	X	X	X	X	X	X	X	X	X		D
E	X	X	X	X	X	X	X	X	X	X	X	X		E
F	X	X	X	X	X	X	X	X	X	X	X	X		F
G	3537751	3565341	3418177	3739338	3650953	3687319	3733353	3878745	3842493	3429885	3897039	3796771		G
H	3215889	3432967	3255012	2914201	3254055	3184465	3120364	3312571	3320858	3870729	4147404	4154565		H
	FF/R Ratios
A	X	X	X	X	X	X	X	X	X	X	X	X		A
B	X	X	X	X	X	X	X	X	X	X	X	X		B
C	X	X	X	X	X	X	X	X	X	X	X	X		C
D	X	X	X	X	X	X	X	X	X	X	X	X		D
E	X	X	X	X	X	X	X	X	X	X	X	X		E
F	X	X	X	X	X	X	X	X	X	X	X	X		F
G	0.0437645	0.0446745	0.0466664	0.0409931	0.0429118	0.0432865	0.0394889	0.039273	0.040944	0.0509032	0.0492238	0.0509135		G
H	0.0561792	0.0563344	0.0577534	0.0575273	0.0568223	0.0587059	0.0597988	0.0607866	0.0611104	0.0499177	0.0501658	0.0502447		H
	Mean
A	X	X	X	X	X	X	X	X	X	X	X	X		A
B	X	X	X	X	X	X	X	X	X	X	X	X		B
C	X	X	X	X	X	X	X	X	X	X	X	X		C
D	X	X	X	X	X	X	X	X	X	X	X	X		D
E	X	X	X	X	X	X	X	X	X	X	X	X		E
F	X	X	X	X	X	X	X	X	X	X	X	X		F
G	0.0450352			0.0423971			0.039902			0.0503468				G
H	0.0567556			0.0576852			0.0605653			0.0501094				H
	Relative LUC Activity
A	X	X	X	X	X	X	X	X	X	X	X	X		A
B	X	X	X	X	X	X	X	X	X	X	X	X		B
C	X	X	X	X	X	X	X	X	X	X	X	X		C
D	X	X	X	X	X	X	X	X	X	X	X	X		D
E	X	X	X	X	X	X	X	X	X	X	X	X		E
F	X	X	X	X	X	X	X	X	X	X	X	X		F
G	1			1			1			1		BCCIP + DHSUR2		G
H	1.26025			1.36059			1.51785			0.995285		BCCIP + HSUR2		H
	Experiment_11
		Firefly-LUC	1	2	3	4	5	6	7	8	9	10	11	12
	A	PACS1+DHSUR2-1	54347	56340	56601	X	X	X	X	X	X	X	X	X	A
	B	PACS1+HSUR2-1	70629	68007	72164	X	X	X	X	X	X	X	X	X	B
	C	PACS1+HSUR2D142-3p-1	61245	63371	64043	X	X	X	X	X	X	X	X	X	C
	D	PACS1+DHSUR2-1	86110	90593	90955	X	X	X	X	X	X	X	X	X	D
	E	PACS1+HSUR2-1	102814	110022	109420	X	X	X	X	X	X	X	X	X	E
	F	PACS1+HSUR2D142-3p-1	89297	95652	94243	X	X	X	X	X	X	X	X	X	F
	G		X	X	X	X	X	X	X	X	X	X	X	X	G
	H		X	X	X	X	X	X	X	X	X	X	X	X	H
		Renilla-LUC
	A	PACS1+DHSUR2-1	869117	903861	891383	X	X	X	X	X	X	X	X	X	A
	B	PACS1+HSUR2-1	1769290	1637710	1722714	X	X	X	X	X	X	X	X	X	B
	C	PACS1+HSUR2D142-3p-1	1295665	1352155	1330180	X	X	X	X	X	X	X	X	X	C
	D	PACS1+DHSUR2-1	1127032	1191634	1190646	X	X	X	X	X	X	X	X	X	D
	E	PACS1+HSUR2-1	1775101	1927053	1868474	X	X	X	X	X	X	X	X	X	E
	F	PACS1+HSUR2D142-3p-1	1418061	1540088	1518532	X	X	X	X	X	X	X	X	X	F
	G		X	X	X	X	X	X	X	X	X	X	X	X	G
	H		X	X	X	X	X	X	X	X	X	X	X	X	H
		Ratio
	A	PACS1+DHSUR2_wide	0.0625313	0.0623326	0.063498	X	X	X	X	X	X	X	X	X	A
	B	PACS1+HSUR2_wide	0.0399194	0.0415257	0.0418897	X	X	X	X	X	X	X	X	X	B
	C	PACS1+HSUR2D142-3p_wide	0.0472692	0.0468667	0.0481461	X	X	X	X	X	X	X	X	X	C
	D	PACS1+DHSUR2-1	0.0764042	0.0760242	0.0763913	X	X	X	X	X	X	X	X	X	D
	E	PACS1+HSUR2-1	0.0579201	0.0570934	0.0585612	X	X	X	X	X	X	X	X	X	E
	F	PACS1+HSUR2D142-3p-1	0.0629712	0.0621081	0.0620619	X	X	X	X	X	X	X	X	X	F
	G		X	X	X	X	X	X	X	X	X	X	X	X	G
	H		X	X	X	X	X	X	X	X	X	X	X	X	H
		Relative LUC Activity
	A	PACS1+DHSUR2-1	0.995923	0.992758	1.01132	X	X	X	X	X	X	X	X	X	A
	B	PACS1+HSUR2-1	0.635788	0.661371	0.667169	X	X	X	X	X	X	X	X	X	B
	C	PACS1+HSUR2D142-3p-1	0.752846	0.746436	0.766813	X	X	X	X	X	X	X	X	X	C
	D	PACS1+DHSUR2-1	1.00172	0.996735	1.00155	X	X	X	X	X	X	X	X	X	D
	E	PACS1+HSUR2-1	0.759376	0.748538	0.767781	X	X	X	X	X	X	X	X	X	E
	F	PACS1+HSUR2D142-3p-1	0.8256	0.814285	0.813679	X	X	X	X	X	X	X	X	X	F
	G		X	X	X	X	X	X	X	X	X	X	X	X	G
	H		X	X	X	X	X	X	X	X	X	X	X	X	H
		Mean
	A	PACS1+DHSUR2-1	1			X	X	X	X	X	X	X	X	X	A
	B	PACS1+HSUR2-1	0.654776			X	X	X	X	X	X	X	X	X	B
	C	PACS1+HSUR2D142-3p-1	0.755365			X	X	X	X	X	X	X	X	X	C
	D	PACS1+DHSUR2-1	1			X	X	X	X	X	X	X	X	X	D
	E	PACS1+HSUR2-1	0.758565			X	X	X	X	X	X	X	X	X	E
	F	PACS1+HSUR2D142-3p-1	0.817855			X	X	X	X	X	X	X	X	X	F
	G		X	X	X	X	X	X	X	X	X	X	X	X	G
	H		X	X	X	X	X	X	X	X	X	X	X	X	H
	Experiment_12
	1	2	3	4	5	6		7	8	9	Firefly-LUC	10	11	12
A	X	X	X	X	X	X		X	X	X	PACS1+DHSUR2-2	116661	126101	123443	A
B	X	X	X	X	X	X		X	X	X	PACS1+DHSUR2-3	103207	112095	114209	B
C	X	X	X	X	X	X		X	X	X	PACS1+DHSUR2-4	92961	97608	106220	C
D	X	X	X	X	X	X		X	X	X	PACS1+HSUR2-2	110381	115085	122698	D
E	X	X	X	X	X	X		X	X	X	PACS1+HSUR2-3	97913	101950	103210	E
F	X	X	X	X	X	X		X	X	X	PACS1+HSUR2-4	116558	125977	124939	F
G	X	X	X	X	X	X		X	X	X	PACS1+HSUR2D142-3p-2	107178	118314	118494	G
H	X	X	X	X	X	X	PACS1+HSUR2D142-3p-4	111624	118542	121120	PACS1+HSUR2D142-3p-3	116412	124789	126027	H
											Renilla-LUC
A	X	X	X	X	X	X		X	X	X	PACS1+DHSUR2-2	1103405	1185978	1185666	A
B	X	X	X	X	X	X		X	X	X	PACS1+DHSUR2-3	1092517	1182636	1200848	B
C	X	X	X	X	X	X		X	X	X	PACS1+DHSUR2-4	938636	1039107	1006755	C
D	X	X	X	X	X	X		X	X	X	PACS1+HSUR2-2	1574221	1508891	1558693	D
E	X	X	X	X	X	X		X	X	X	PACS1+HSUR2-3	1301366	1318059	1311370	E
F	X	X	X	X	X	X		X	X	X	PACS1+HSUR2-4	1422330	1520240	1498826	F
G	X	X	X	X	X	X		X	X	X	PACS1+HSUR2D142-3p-2	1339142	1448322	1431733	G
H	X	X	X	X	X	X	PACS1+HSUR2D142-3p-4	1255937	1324431	1333594	PACS1+HSUR2D142-3p-3	1392491	1482234	1452996	H
											Ratio
A	X	X	X	X	X	X		X	X	X	PACS1+DHSUR2-2	0.105728	0.106327	0.104113	A
B	X	X	X	X	X	X		X	X	X	PACS1+DHSUR2-3	0.0944672	0.094784	0.095107	B
C	X	X	X	X	X	X		X	X	X	PACS1+DHSUR2-4	0.0990384	0.0939345	0.105507	C
D	X	X	X	X	X	X		X	X	X	PACS1+HSUR2-2	0.0701179	0.0762712	0.0787185	D
E	X	X	X	X	X	X		X	X	X	PACS1+HSUR2-3	0.0752386	0.0773486	0.078704	E
F	X	X	X	X	X	X		X	X	X	PACS1+HSUR2-4	0.0819486	0.0828665	0.0833579	F
G	X	X	X	X	X	X		X	X	X	PACS1+HSUR2D142-3p-2	0.0800348	0.0816904	0.0827626	G
H	X	X	X	X	X	X	PACS1+HSUR2D142-3p-4	0.0888771	0.0895041	0.0908222	PACS1+HSUR2D142-3p-3	0.0835998	0.0841898	0.086736	H
											Relative LUC Activity
A	X	X	X	X	X	X		X	X	X	PACS1+DHSUR2-2	1.00322	1.00889	0.987889	A
B	X	X	X	X	X	X		X	X	X	PACS1+DHSUR2-3	0.996636	0.999979	1.00339	B
C	X	X	X	X	X	X		X	X	X	PACS1+DHSUR2-4	0.995427	0.944128	1.06045	C
D	X	X	X	X	X	X		X	X	X	PACS1+HSUR2-2	0.665323	0.72371	0.746932	D
E	X	X	X	X	X	X		X	X	X	PACS1+HSUR2-3	0.793773	0.816033	0.830333	E
F	X	X	X	X	X	X		X	X	X	PACS1+HSUR2-4	0.823659	0.832885	0.837824	F
G	X	X	X	X	X	X		X	X	X	PACS1+HSUR2D142-3p-2	0.759422	0.775131	0.785305	G
H	X	X	X	X	X	X	PACS1+HSUR2D142-3p-4	0.893296	0.899598	0.912847	PACS1+HSUR2D142-3p-3	0.881984	0.888209	0.915071	H
											Mean
A	X	X	X	X	X	X		X	X	X	PACS1+DHSUR2-2	1			A
B	X	X	X	X	X	X		X	X	X	PACS1+DHSUR2-3	1			B
C	X	X	X	X	X	X		X	X	X	PACS1+DHSUR2-4	1			C
D	X	X	X	X	X	X		X	X	X	PACS1+HSUR2-2	0.711988			D
E	X	X	X	X	X	X		X	X	X	PACS1+HSUR2-3	0.81338			E
F	X	X	X	X	X	X		X	X	X	PACS1+HSUR2-4	0.831456			F
G	X	X	X	X	X	X		X	X	X	PACS1+HSUR2D142-3p-2	0.773286			G
H	X	X	X	X	X	X	PACS1+HSUR2D142-3p-4	0.901914			PACS1+HSUR2D142-3p-3	0.895088			H
	Experiment_13
	Firefly LUC Activity	1	2	3	Firefly LUC Activity	4	5	6	Firefly LUC Activity	7	8	9	10	11	12
A	MGA+DHSUR2-1	78313	72916	76801	MGA+DHSUR2-2	112117	121802	121577	MGA+DHSUR2-3	67600	74027	72255	X	X	X	A
B	MGA+HSUR2D142-3p-1	31180	33040	32327	MGA+HSUR2D142-3p-2	20809	21833	21608	MGA+HSUR2D142-3p-3	42738	44509	45149	X	X	X	B
C	TP53RK+DHSUR2-1	123844	130477	129195	TP53RK+DHSUR2-2	132609	136498	143537	TP53RK+DHSUR2-3	147481	149048	159360	X	X	X	C
D	TP53RK+HSUR2D142-3p-1	157133	171952	161485	TP53RK+HSUR2D142-3p-2	76555	81284	78945	TP53RK+HSUR2D142-3p-3	78055	84494	82096	X	X	X	D
E	STK4+DHSUR2-1	60078	64484	62705	STK4+DHSUR2-2	105144	113567	110477	STK4+DHSUR2-3	65087	74797	74058	X	X	X	E
F	STK4+HSUR2D142-3p-1	82536	86635	88155	STK4+HSUR2D142-3p-2	45105	49199	47229	STK4+HSUR2D142-3p-3	57209	63399	60493	X	X	X	F
G	PACS+DHSUR2-5	78982	85726	82995	PACS1+HSUR2-5	75858	83133	82846	PACS1+HSUR2D142-3p-5	94831	102837	102212	X	X	X	G
H	PACS+DHSUR2-6	69467	73574	71004	PACS1+HSUR2-6	35667	37680	37530	PACS1+HSUR2D142-3p-6	81327	87800	88242	X	X	X	H
	Renilla LUC Activity				Renilla LUC Activity				Renilla LUC Activity
A	MGA+DHSUR2-1	294534	278290	288543	MGA+DHSUR2-2	532157	561255	551802	MGA+DHSUR2-3	223344	240930	232451	X	X	X	A
B	MGA+HSUR2D142-3p-1	101941	107404	103485	MGA+HSUR2D142-3p-2	87682	90196	88285	MGA+HSUR2D142-3p-3	145670	150152	148883	X	X	X	B
C	TP53RK+DHSUR2-1	271671	286527	278884	TP53RK+DHSUR2-2	281487	320437	301659	TP53RK+DHSUR2-3	310146	312510	329755	X	X	X	C
D	TP53RK+HSUR2D142-3p-1	385657	424637	396300	TP53RK+HSUR2D142-3p-2	175136	189168	186364	TP53RK+HSUR2D142-3p-3	159762	174211	169513	X	X	X	D
E	STK4+DHSUR2-1	348203	376349	366919	STK4+DHSUR2-2	591980	636955	626795	STK4+DHSUR2-3	346067	367878	348965	X	X	X	E
F	STK4+HSUR2D142-3p-1	460311	478788	485621	STK4+HSUR2D142-3p-2	194678	212635	200907	STK4+HSUR2D142-3p-3	244591	274646	261424	X	X	X	F
G	PACS+DHSUR2-5	890479	978594	935942	PACS1+HSUR2-5	1309737	1439285	1412580	PACS1+HSUR2D142-3p-5	952760	1051777	1045998	X	X	X	G
H	PACS+DHSUR2-6	866388	925561	928246	PACS1+HSUR2-6	692722	721231	720345	PACS1+HSUR2D142-3p-6	874368	945142	955734	X	X	X	H
	Ratio				Ratio				Ratio
A	MGA+DHSUR2-1	0.265888	0.262014	0.266168	MGA+DHSUR2-2	0.210684	0.217017	0.220327	MGA+DHSUR2-3	0.302672	0.307255	0.31084	X	X	X	A
B	MGA+HSUR2D142-3p-1	0.305863	0.307624	0.312383	MGA+HSUR2D142-3p-2	0.237324	0.242062	0.244753	MGA+HSUR2D142-3p-3	0.293389	0.296426	0.303252	X	X	X	B
C	TP53RK+DHSUR2-1	0.45586	0.455374	0.463257	TP53RK+DHSUR2-2	0.471102	0.425975	0.475825	TP53RK+DHSUR2-3	0.475521	0.476938	0.483268	X	X	X	C
D	TP53RK+HSUR2D142-3p-1	0.407442	0.404939	0.407482	TP53RK+HSUR2D142-3p-2	0.437117	0.429692	0.423606	TP53RK+HSUR2D142-3p-3	0.48857	0.48501	0.484305	X	X	X	D
E	STK4+DHSUR2-1	0.172537	0.171341	0.170896	STK4+DHSUR2-2	0.177614	0.178297	0.176257	STK4+DHSUR2-3	0.188076	0.20332	0.212222	X	X	X	E
F	STK4+HSUR2D142-3p-1	0.179305	0.180946	0.18153	STK4+HSUR2D142-3p-2	0.23169	0.231378	0.235079	STK4+HSUR2D142-3p-3	0.233897	0.230839	0.231398	X	X	X	F
G	PACS+DHSUR2-5	0.0886961	0.0876012	0.0886754	PACS1+HSUR2-5	0.0579185	0.0577599	0.0586487	PACS1+HSUR2D142-3p-5	0.0995329	0.0977745	0.0977172	X	X	X	G
H	PACS+DHSUR2-6	0.08018	0.0794912	0.0764927	PACS1+HSUR2-6	0.0514882	0.052244	0.0521	PACS1+HSUR2D142-3p-6	0.0930123	0.0928961	0.092329	X	X	X	H
	Relative Activity				Relative Activity				Relative Activity
A	MGA+DHSUR2-1	1.00452	0.989891	1.00558	MGA+DHSUR2-2	0.975346	1.00467	1.01999	MGA+DHSUR2-3	0.986152	1.00108	1.01276	X	X	X	A
B	MGA+HSUR2D142-3p-1	1.15555	1.1622	1.18019	MGA+HSUR2D142-3p-2	1.09867	1.12061	1.13306	MGA+HSUR2D142-3p-3	0.955907	0.965802	0.98804	X	X	X	B
C	TP53RK+DHSUR2-1	0.994972	0.993911	1.01112	TP53RK+DHSUR2-2	1.02943	0.93082	1.03975	TP53RK+DHSUR2-3	0.993617	0.996578	1.0098	X	X	X	C
D	TP53RK+HSUR2D142-3p-1	0.889294	0.88383	0.88938	TP53RK+HSUR2D142-3p-2	0.955168	0.938943	0.925645	TP53RK+HSUR2D142-3p-3	1.02088	1.01344	1.01197	X	X	X	D
E	STK4+DHSUR2-1	1.00551	0.99854	0.995947	STK4+DHSUR2-2	1.00127	1.00512	0.993617	STK4+DHSUR2-3	0.934745	1.01051	1.05475	X	X	X	E
F	STK4+HSUR2D142-3p-1	1.04495	1.05452	1.05792	STK4+HSUR2D142-3p-2	1.30611	1.30435	1.32521	STK4+HSUR2D142-3p-3	1.16247	1.14728	1.15005	X	X	X	F
G	PACS+DHSUR2-5	1.00421	0.991814	1.00398	PACS1+HSUR2-5	0.655749	0.653954	0.664016	PACS1+HSUR2D142-3p-5	1.1269	1.107	1.10635	X	X	X	G
H	PACS+DHSUR2-6	1.01853	1.00978	0.971689	PACS1+HSUR2-6	0.654057	0.663658	0.661829	PACS1+HSUR2D142-3p-6	1.18154	1.18006	1.17286	X	X	X	H
	Mean				Mean				Mean
A	MGA+DHSUR2-1	1			MGA+DHSUR2-2	1			MGA+DHSUR2-3	1			X	X	X	A
B	MGA+HSUR2D142-3p-1	1.16598			MGA+HSUR2D142-3p-2	1.11745			MGA+HSUR2D142-3p-3	0.969916			X	X	X	B
C	TP53RK+DHSUR2-1	1			TP53RK+DHSUR2-2	1			TP53RK+DHSUR2-3	1			X	X	X	C
D	TP53RK+HSUR2D142-3p-1	0.887501			TP53RK+HSUR2D142-3p-2	0.939919			TP53RK+HSUR2D142-3p-3	1.01543			X	X	X	D
E	STK4+DHSUR2-1	1			STK4+DHSUR2-2	1			STK4+DHSUR2-3	1			X	X	X	E
F	STK4+HSUR2D142-3p-1	1.05246			STK4+HSUR2D142-3p-2	1.31189			STK4+HSUR2D142-3p-3	1.15327			X	X	X	F
G	PACS+DHSUR2-5	1			PACS1+HSUR2-5	0.657906			PACS1+HSUR2D142-3p-5	1.11342			X	X	X	G
H	PACS+DHSUR2-6	1			PACS1+HSUR2-6	0.659848			PACS1+HSUR2D142-3p-6	1.17815			X	X	X	H
	Experiment_14
	Firefly LUC Activity	1	2	3		4	5	6		7	8	9		10	11	12
A	control+DHSUR2-1	176379	185041	188010	control+HSUR2D142-3p-1	111826	120072	121168	YTHDC1+DHSUR2-1	79494	88723	87862	YTHDC1+HSUR2D142-3p-1	54808	59658	61262	A
B	control+DHSUR2-2	142220	148156	150017	control+HSUR2D142-3p-2	111172	120404	119118	YTHDC1+DHSUR2-2	68701	73968	74063	YTHDC1+HSUR2D142-3p-2	64086	68372	66489	B
C	control+DHSUR2-3	138387	141616	144540	control+HSUR2D142-3p-3	159339	171415	170697	YTHDC1+DHSUR2-3	64083	68645	68565	YTHDC1+HSUR2D142-3p-3	53263	57798	58299	C
D	CD69+DHSUR2-1	18926	18327	18111	CD69+HSUR2D142-3p-1	16801	18214	17810	BCCIP+DHSUR2-1	70304	75203	73926	BCCIP+HSUR2D142-3p-1	57919	64308	63913	D
E	CD69+DHSUR2-2	18644	20006	19766	CD69+HSUR2D142-3p-2	13736	14546	14705	BCCIP+DHSUR2-2	121785	130234	128033	BCCIP+HSUR2D142-3p-2	1166	1130	1114	E
F	CD69+DHSUR2-3	17423	18493	18448	CD69+HSUR2D142-3p-3	16368	17345	17760	BCCIP+DHSUR2-3	98512	105886	104470	BCCIP+HSUR2D142-3p-3	40573	42579	43995	F
G		X	X	X		X	X	X		X	X	X		X	X	X	G
H		X	X	X		X	X	X		X	X	X		X	X	X	H
	Renilla LUC Activity
A	control+DHSUR2-1	749248	873887	868861	control+HSUR2D142-3p-1	520256	553376	549516	YTHDC1+DHSUR2-1	773865	824236	792187	YTHDC1+HSUR2D142-3p-1	508115	543554	544982	A
B	control+DHSUR2-2	582310	612144	613482	control+HSUR2D142-3p-2	482641	513836	502320	YTHDC1+DHSUR2-2	556328	627743	626856	YTHDC1+HSUR2D142-3p-2	520172	549724	520579	B
C	control+DHSUR2-3	519834	534993	540660	control+HSUR2D142-3p-3	686098	734320	729230	YTHDC1+DHSUR2-3	501482	537031	532487	YTHDC1+HSUR2D142-3p-3	379879	406613	407302	C
D	CD69+DHSUR2-1	311184	311162	312204	CD69+HSUR2D142-3p-1	294192	321803	312107	BCCIP+DHSUR2-1	594733	632454	619488	BCCIP+HSUR2D142-3p-1	461025	523742	508746	D
E	CD69+DHSUR2-2	326470	356223	351919	CD69+HSUR2D142-3p-2	227695	242826	243468	BCCIP+DHSUR2-2	1121971	1206324	1196093	BCCIP+HSUR2D142-3p-2	10006	10623	10569	E
F	CD69+DHSUR2-3	304786	323273	321201	CD69+HSUR2D142-3p-3	239026	253815	260179	BCCIP+DHSUR2-3	851305	928461	896251	BCCIP+HSUR2D142-3p-3	284476	299935	309775	F
G		X	X	X		X	X	X		X	X	X		X	X	X	G
H		X	X	X		X	X	X		X	X	X		X	X	X	H
	Ratio
A	control+DHSUR2-1	0.235408	0.211745	0.216387	control+HSUR2D142-3p-1	0.214944	0.216981	0.220499	YTHDC1+DHSUR2-1	0.102723	0.107643	0.110911	YTHDC1+HSUR2D142-3p-1	0.107865	0.109755	0.112411	A
B	control+DHSUR2-2	0.244234	0.242028	0.244534	control+HSUR2D142-3p-2	0.230341	0.234324	0.237136	YTHDC1+DHSUR2-2	0.12349	0.117832	0.11815	YTHDC1+HSUR2D142-3p-2	0.123202	0.124375	0.127721	B
C	control+DHSUR2-3	0.266214	0.264706	0.26734	control+HSUR2D142-3p-3	0.232239	0.233434	0.234078	YTHDC1+DHSUR2-3	0.127787	0.127823	0.128764	YTHDC1+HSUR2D142-3p-3	0.14021	0.142145	0.143135	C
D	CD69+DHSUR2-1	0.0608193	0.0588986	0.0580101	CD69+HSUR2D142-3p-1	0.057109	0.0565998	0.0570638	BCCIP+DHSUR2-1	0.118211	0.118907	0.119334	BCCIP+HSUR2D142-3p-1	0.125631	0.122786	0.125629	D
E	CD69+DHSUR2-2	0.0571079	0.0561614	0.0561663	CD69+HSUR2D142-3p-2	0.0603263	0.059903	0.0603981	BCCIP+DHSUR2-2	0.108546	0.107959	0.107043	BCCIP+HSUR2D142-3p-2	0.11653	0.106373	0.105403	E
F	CD69+DHSUR2-3	0.0571647	0.0572055	0.0574344	CD69+HSUR2D142-3p-3	0.0684779	0.0683372	0.0682607	BCCIP+DHSUR2-3	0.115719	0.114045	0.116563	BCCIP+HSUR2D142-3p-3	0.142624	0.141961	0.142022	F
G		X	X	X		X	X	X		X	X	X		X	X	X	G
H		X	X	X		X	X	X		X	X	X		X	X	X	H
	Relative LUC Activity
A	control+DHSUR2-1	1.06433	0.957342	0.978329	control+HSUR2D142-3p-1	0.971807	0.981015	0.996924	YTHDC1+DHSUR2-1	0.959204	1.00514	1.03566	YTHDC1+HSUR2D142-3p-1	1.00722	1.02487	1.04967	A
B	control+DHSUR2-2	1.00261	0.993553	1.00384	control+HSUR2D142-3p-2	0.945576	0.961926	0.973469	YTHDC1+DHSUR2-2	1.0306	0.983374	0.98603	YTHDC1+HSUR2D142-3p-2	1.02819	1.03798	1.06591	B
C	control+DHSUR2-3	1.00048	0.994812	1.00471	control+HSUR2D142-3p-3	0.872796	0.877284	0.879707	YTHDC1+DHSUR2-3	0.997366	0.997647	1.00499	YTHDC1+HSUR2D142-3p-3	1.09433	1.10943	1.11715	C
D	CD69+DHSUR2-1	1.02661	0.994192	0.979195	CD69+HSUR2D142-3p-1	0.963983	0.95539	0.96322	BCCIP+DHSUR2-1	0.994898	1.00075	1.00435	BCCIP+HSUR2D142-3p-1	1.05735	1.0334	1.05733	D
E	CD69+DHSUR2-2	1.01114	0.994386	0.994472	CD69+HSUR2D142-3p-2	1.06813	1.06063	1.0694	BCCIP+DHSUR2-2	1.00646	1.00102	0.992522	BCCIP+HSUR2D142-3p-2	1.08049	0.986312	0.977314	E
F	CD69+DHSUR2-3	0.998192	0.998905	1.0029	CD69+HSUR2D142-3p-3	1.19574	1.19328	1.19195	BCCIP+DHSUR2-3	1.0024	0.987893	1.00971	BCCIP+HSUR2D142-3p-3	1.23545	1.22971	1.23025	F
G		X	X	X		X	X	X		X	X	X		X	X	X	G
H		X	X	X		X	X	X		X	X	X		X	X	X	H
	Mean
A	control+DHSUR2-1	1			control+HSUR2D142-3p-1	0.983249			YTHDC1+DHSUR2-1	1			YTHDC1+HSUR2D142-3p-1	1.02725			A
B	control+DHSUR2-2	1			control+HSUR2D142-3p-2	0.960324			YTHDC1+DHSUR2-2	1			YTHDC1+HSUR2D142-3p-2	1.04403			B
C	control+DHSUR2-3	1			control+HSUR2D142-3p-3	0.876596			YTHDC1+DHSUR2-3	1			YTHDC1+HSUR2D142-3p-3	1.10697			C
D	CD69+DHSUR2-1	1			CD69+HSUR2D142-3p-1	0.960864			BCCIP+DHSUR2-1	1			BCCIP+HSUR2D142-3p-1	1.04936			D
E	CD69+DHSUR2-2	1			CD69+HSUR2D142-3p-2	1.06605			BCCIP+DHSUR2-2	1			BCCIP+HSUR2D142-3p-2	1.01471			E
F	CD69+DHSUR2-3	1			CD69+HSUR2D142-3p-3	1.19366			BCCIP+DHSUR2-3	1			BCCIP+HSUR2D142-3p-3	1.2318			F
G		X	X	X		X	X	X		X	X	X		X	X	X	G
H		X	X	X		X	X	X		X	X	X		X	X	X	H
	Experiment_15
	Firefly Luciferase	1	2	3	4	5	6	7	8	9	10	11	12
A		124486	120237	123122	119303	120743	128474	200451	193569	200292	191435	201791	206380	A
B		149727	139301	148475	121658	119360	129125	356533	339886	380647	278202	295665	307798	B
C		101187	98892	99183	X	X	X	X	X	X	X	X	X	C
D		141313	136979	132500	X	X	X	X	X	X	X	X	X	D
E		X	X	X	X	X	X	X	X	X	X	X	X	E
F		X	X	X	X	X	X	X	X	X	X	X	X	F
G		X	X	X	X	X	X	X	X	X	X	X	X	G
H		X	X	X	X	X	X	X	X	X	X	X	X	H
	Renilla Luciferase
A		1215701	1178510	1191207	1158412	1160835	1217304	766134	735138	756716	1050861	1106058	1118369	A
B		1788693	1741219	1805694	1340064	1296133	1361499	1949978	1918521	2183759	2112041	2140343	2252795	B
C		918765	899546	895677	X	X	X	X	X	X	X	X	X	C
D		1436249	1406370	1356852	X	X	X	X	X	X	X	X	X	D
E		X	X	X	X	X	X	X	X	X	X	X	X	E
F		X	X	X	X	X	X	X	X	X	X	X	X	F
G		X	X	X	X	X	X	X	X	X	X	X	X	G
H		X	X	X	X	X	X	X	X	X	X	X	X	H
	FF/R Ratios
A		0.102399	0.102025	0.103359	0.102988	0.104014	0.10554	0.26164	0.26331	0.264686	0.18217	0.182442	0.184537	A
B		0.0837075	0.080002	0.082226	0.0907852	0.0920893	0.0948403	0.182839	0.17716	0.174308	0.131722	0.138139	0.136629	B
C		0.110134	0.109935	0.110735	X	X	X	X	X	X	X	X	X	C
D		0.0983903	0.097399	0.0976525	X	X	X	X	X	X	X	X	X	D
E		X	X	X	X	X	X	X	X	X	X	X	X	E
F		X	X	X	X	X	X	X	X	X	X	X	X	F
G		X	X	X	X	X	X	X	X	X	X	X	X	G
H		X	X	X	X	X	X	X	X	X	X	X	X	H
	Mean
A	MGA + DHSUR2	0.102594		YTHDC1 + DHSUR2	0.104181		TP53RK + DHSUR2	0.263212		STK4 + DHSUR2	0.183049			A
B	MGA + HSUR2	0.0819785		YTHDC1 + HSUR2	0.0925716		TP53RK + HSUR2	0.178103		STK4 + HSUR2	0.135497			B
C	MGA + DHSUR2	0.110268			X	X	X	X	X	X	X	X	X	C
D	MGA + HSUR2	0.0978139			X	X	X	X	X	X	X	X	X	D
E		X	X	X	X	X	X	X	X	X	X	X	X	E
F		X	X	X	X	X	X	X	X	X	X	X	X	F
G		X	X	X	X	X	X	X	X	X	X	X	X	G
H		X	X	X	X	X	X	X	X	X	X	X	X	H
	Relative LUC Activity
A	MGA + DHSUR2	1		YTHDC1 + DHSUR2	1		TP53RK + DHSUR2	1		STK4 + DHSUR2	1			A
B	MGA + HSUR2	0.799057		YTHDC1 + HSUR2	0.888568		TP53RK + HSUR2	0.676652		STK4 + HSUR2	0.74022			B
C	MGA + DHSUR2	1			X	X	X	X	X	X	X	X	X	C
D	MGA + HSUR2	0.887055			X	X	X	X	X	X	X	X	X	D
E		X	X	X	X	X	X	X	X	X	X	X	X	E
F		X	X	X	X	X	X	X	X	X	X	X	X	F
G		X	X	X	X	X	X	X	X	X	X	X	X	G
H		X	X	X	X	X	X	X	X	X	X	X	X	H
