# Supplementary material for: Viral miRNA adaptor differentially recruits miRNAs to target mRNAs through alternative base-pairing
Source: eLife. 2019 Sep 20;8:e50530. doi: 10.7554/eLife.50530 (PMC6763288; doi:10.7554/eLife.50530)
Supplement: Figure 4—figure supplement 1—source data 1. [file elife-50530-fig4-figsupp1-data1.xlsx]

## Sheet: Sheet1
Nucleofected 2x106 U937 cells expressing mutant PACS1 LUC or YTHDC1 LUC reporters with 3 µg of either GFP-DHSUR2, GFP-HSUR2, GFP-HSUR2 mutant 17 or GFP-HSUR2 mutant 15 plasmids per transfection
using Amaxa's kit V and program T-020 and grown at 37°C/5% CO2 for 18 hours. Cells were harvested and 30,000 cells were collected by FACS into 0.5 ml of complete media containing 4 µg/ml puromycin & 10 µg/ml blasticidin
using a narrow, high-expressing GFP window. Cells were placed in the incubator at 37°C/5% CO2 for 1 hour and then cells were sedimented at 1000 x g for 20 min and the media was removed completely by aspiration.
Cells were lysed with 50 µl of 1X passive lysis buffer for 15 min at room temperature and gently vortexed prior to aliquoting 10 µl of lysate in triplicate per well of a 96-well plate. Firefly and Renilla LUC activity were measured
consecutively using 50 µl of LUC reagent, respectively.
Experiment_1
Firefly LUC Activity	1	2	3		4	5	6		7	8	9	10	11	12
X	X	X	X	X	X	X	X	X	X	X	X	X	X	X
X	X	X	X	X	X	X	X	X	X	X	X	X	X	X
X	X	X	X	X	X	X	X	X	X	X	X	X	X	X
YTHDC1mut+DHSUR2-1	46744	48596	49283	YTHDC1mut+DHSUR2-2	59698	64332	64425	YTHDC1mut+DHSUR2-3	47971	48105	51125	X	X	X
YTHDC1mut+HSUR2-1	61335	60085	67632	YTHDC1mut+HSUR2-2	58784	62939	63066	YTHDC1mut+HSUR2-3	51257	53907	54421	X	X	X
YTHDC1mut+HSUR2mut-15-1	38438	40189	41076	YTHDC1mut+HSUR2mut-15-2	66220	66899	71251	YTHDC1mut+HSUR2mut-15-3	62755	66965	66426	X	X	X
X	X	X	X	X	X	X	X	X	X	X	X	X	X	X
X	X	X	X	X	X	X	X	X	X	X	X	X	X	X
Renilla LUC Activity
X	X	X	X	X	X	X	X	X	X	X	X	X	X	X
X	X	X	X	X	X	X	X	X	X	X	X	X	X	X
X	X	X	X	X	X	X	X	X	X	X	X	X	X	X
YTHDC1mut+DHSUR2-1	378857	388456	391273	YTHDC1mut+DHSUR2-2	414552	451041	446743	YTHDC1mut+DHSUR2-3	311057	312502	325034	X	X	X
YTHDC1mut+HSUR2-1	567525	589002	567870	YTHDC1mut+HSUR2-2	407488	410074	408366	YTHDC1mut+HSUR2-3	414456	437766	435205	X	X	X
YTHDC1mut+HSUR2mut-15-1	406546	418795	412582	YTHDC1mut+HSUR2mut-15-2	695713	731538	723755	YTHDC1mut+HSUR2mut-15-3	621896	605814	664860	X	X	X
X	X	X	X	X	X	X	X	X	X	X	X	X	X	X
X	X	X	X	X	X	X	X	X	X	X	X	X	X	X
Ratio
X	X	X	X	X	X	X	X	X	X	X	X	X	X	X
X	X	X	X	X	X	X	X	X	X	X	X	X	X	X
X	X	X	X	X	X	X	X	X	X	X	X	X	X	X
YTHDC1mut+DHSUR2-1	0.123382	0.1251	0.125956	YTHDC1mut+DHSUR2-2	0.144006	0.14263	0.14421	YTHDC1mut+DHSUR2-3	0.154219	0.153935	0.157291	X	X	X
YTHDC1mut+HSUR2-1	0.108075	0.102012	0.119098	YTHDC1mut+HSUR2-2	0.144259	0.153482	0.154435	YTHDC1mut+HSUR2-3	0.123673	0.123141	0.125047	X	X	X
YTHDC1mut+HSUR2mut-15-1	0.0945477	0.0959634	0.0995584	YTHDC1mut+HSUR2mut-15-2	0.0951829	0.0914498	0.0984463	YTHDC1mut+HSUR2mut-15-3	0.100909	0.110537	0.0999098	X	X	X
X	X	X	X	X	X	X	X	X	X	X	X	X	X	X
X	X	X	X	X	X	X	X	X	X	X	X	X	X	X
Relative LUC Activity
X	X	X	X	X	X	X	X	X	X	X	X	X	X	X
X	X	X	X	X	X	X	X	X	X	X	X	X	X	X
X	X	X	X	X	X	X	X	X	X	X	X	X	X	X
YTHDC1mut+DHSUR2-1	0.988536	1.00231	1.00916	YTHDC1mut+DHSUR2-2	1.00272	0.993138	1.00414	YTHDC1mut+DHSUR2-3	0.994011	0.992178	1.01381	X	X	X
YTHDC1mut+HSUR2-1	0.865895	0.817318	0.954213	YTHDC1mut+HSUR2-2	1.00448	1.0687	1.07534	YTHDC1mut+HSUR2-3	0.797126	0.793698	0.805981	X	X	X
YTHDC1mut+HSUR2mut-15-1	0.757518	0.76886	0.797663	YTHDC1mut+HSUR2mut-15-2	0.662762	0.636768	0.685485	YTHDC1mut+HSUR2mut-15-3	0.650404	0.712461	0.643962	X	X	X
X	X	X	X	X	X	X	X	X	X	X	X	X	X	X
X	X	X	X	X	X	X	X	X	X	X	X	X	X	X
Mean
X	X	X	X	X	X	X	X	X	X	X	X	X	X	X
X	X	X	X	X	X	X	X	X	X	X	X	X	X	X
X	X	X	X	X	X	X	X	X	X	X	X	X	X	X
YTHDC1mut+DHSUR2-1	1			YTHDC1mut+DHSUR2-2	1			YTHDC1mut+DHSUR2-3	1			X	X	X
YTHDC1mut+HSUR2-1	0.879142			YTHDC1mut+HSUR2-2	1.04951			YTHDC1mut+HSUR2-3	0.798935			X	X	X
YTHDC1mut+HSUR2mut-15-1	0.774681			YTHDC1mut+HSUR2mut-15-2	0.661672			YTHDC1mut+HSUR2mut-15-3	0.668942			X	X	X
X	X	X	X	X	X	X	X	X	X	X	X	X	X	X
X	X	X	X	X	X	X	X	X	X	X	X	X	X	X
Experiment_2
Firefly LUC Activity	1	2	3		4	5	6		7	8	9	10	11	12
PACS1mut+DHSUR2-1	39811	41360	41905	PACS1mut+DHSUR2-2	29673	32563	32343	PACS1mut+DHSUR2-3	57041	61210	62441	X	X	X
PACS1mut+HSUR2-1	30663	31126	33040	PACS1mut+HSUR2-2	29464	31009	30923	PACS1mut+HSUR2-3	41086	43046	46561	X	X	X
PACS1mut+HSUR2mut-17-1	17401	17721	17173	PACS1mut+HSUR2mut-17-2	30017	30584	33340	PACS1mut+HSUR2mut-17-3	31917	34099	34255	X	X	X
YTHDC1mut+DHSUR2-4	28784	30916	30693	YTHDC1mut+DHSUR2-5	24752	26679	26902	YTHDC1mut+DHSUR2-6	19593	19731	20607	X	X	X
YTHDC1mut+HSUR2-4	19456	21199	20550	YTHDC1mut+HSUR2-5	16166	17019	17111	YTHDC1mut+HSUR2-6	36172	38489	38437	X	X	X
YTHDC1mut+HSUR2mut-15-4	30169	32612	32834	YTHDC1mut+HSUR2mut-15-5	22950	23193	23692	YTHDC1mut+HSUR2mut-15-6	41439	42817	44603	X	X	X
X	X	X	X	X	X	X	X	X	X	X	X	X	X	X
X	X	X	X	X	X	X	X	X	X	X	X	X	X	X
Renilla LUC Activity
PACS1mut+DHSUR2-1	670177	700672	704710	PACS1mut+DHSUR2-2	501056	548898	545260	PACS1mut+DHSUR2-3	937847	1003568	1014067	X	X	X
PACS1mut+HSUR2-1	557386	569316	587372	PACS1mut+HSUR2-2	547862	576681	567477	PACS1mut+HSUR2-3	769947	762978	803929	X	X	X
PACS1mut+HSUR2mut-17-1	367629	377195	365316	PACS1mut+HSUR2mut-17-2	740834	747911	790179	PACS1mut+HSUR2mut-17-3	843585	877102	846824	X	X	X
YTHDC1mut+DHSUR2-4	367160	397746	392149	YTHDC1mut+DHSUR2-5	285510	309345	310828	YTHDC1mut+DHSUR2-6	239387	240877	253016	X	X	X
YTHDC1mut+HSUR2-4	254834	277416	270881	YTHDC1mut+HSUR2-5	207030	216092	216650	YTHDC1mut+HSUR2-6	516624	554787	549105	X	X	X
YTHDC1mut+HSUR2mut-15-4	519302	553997	557108	YTHDC1mut+HSUR2mut-15-5	336912	356838	341411	YTHDC1mut+HSUR2mut-15-6	654377	676343	700560	X	X	X
X	X	X	X	X	X	X	X	X	X	X	X	X	X	X
X	X	X	X	X	X	X	X	X	X	X	X	X	X	X
Ratio
PACS1mut+DHSUR2-1	0.0594037	0.059029	0.0594642	PACS1mut+DHSUR2-2	0.0592209	0.0593243	0.0593167	PACS1mut+DHSUR2-3	0.0608212	0.0609924	0.0615748	X	X	X
PACS1mut+HSUR2-1	0.0550121	0.0546726	0.0562506	PACS1mut+HSUR2-2	0.05378	0.0537715	0.0544921	PACS1mut+HSUR2-3	0.0533621	0.0564184	0.0579168	X	X	X
PACS1mut+HSUR2mut-17-1	0.047333	0.046981	0.0470086	PACS1mut+HSUR2mut-17-2	0.0405178	0.0408926	0.042193	PACS1mut+HSUR2mut-17-3	0.037835	0.0388769	0.0404511	X	X	X
YTHDC1mut+DHSUR2-4	0.0783963	0.077728	0.0782687	YTHDC1mut+DHSUR2-5	0.086694	0.0862435	0.0865495	YTHDC1mut+DHSUR2-6	0.0818465	0.0819132	0.0814454	X	X	X
YTHDC1mut+HSUR2-4	0.0763477	0.0764159	0.0758636	YTHDC1mut+HSUR2-5	0.0780853	0.0787581	0.0789799	YTHDC1mut+HSUR2-6	0.0700161	0.0693762	0.0699994	X	X	X
YTHDC1mut+HSUR2mut-15-4	0.0580953	0.0588667	0.0589365	YTHDC1mut+HSUR2mut-15-5	0.0681187	0.0649959	0.0693944	YTHDC1mut+HSUR2mut-15-6	0.0633259	0.0633066	0.0636676	X	X	X
X	X	X	X	X	X	X	X	X	X	X	X	X	X	X
X	X	X	X	X	X	X	X	X	X	X	X	X	X	X
Relative LUC Activity
PACS1mut+DHSUR2-1	1.00177	0.995448	1.00279	PACS1mut+DHSUR2-2	0.99888	1.00062	1.0005	PACS1mut+DHSUR2-3	0.994957	0.997757	1.00729	X	X	X
PACS1mut+HSUR2-1	0.927708	0.921983	0.948592	PACS1mut+HSUR2-2	0.907108	0.906965	0.919119	PACS1mut+HSUR2-3	0.872936	0.922933	0.947445	X	X	X
PACS1mut+HSUR2mut-17-1	0.79821	0.792273	0.792739	PACS1mut+HSUR2mut-17-2	0.683415	0.689736	0.71167	PACS1mut+HSUR2mut-17-3	0.618931	0.635976	0.661729	X	X	X
YTHDC1mut+DHSUR2-4	1.0034	0.994842	1.00176	YTHDC1mut+DHSUR2-5	1.00229	0.997085	1.00062	YTHDC1mut+DHSUR2-6	1.00136	1.00218	0.996457	X	X	X
YTHDC1mut+HSUR2-4	0.977176	0.978048	0.970979	YTHDC1mut+HSUR2-5	0.902766	0.910544	0.913109	YTHDC1mut+HSUR2-6	0.856623	0.848793	0.856418	X	X	X
YTHDC1mut+HSUR2mut-15-4	0.743562	0.753436	0.754329	YTHDC1mut+HSUR2mut-15-5	0.787539	0.751435	0.802287	YTHDC1mut+HSUR2mut-15-6	0.77477	0.774535	0.778951	X	X	X
X	X	X	X	X	X	X	X	X	X	X	X	X	X	X
X	X	X	X	X	X	X	X	X	X	X	X	X	X	X
Mean
PACS1mut+DHSUR2-1	1			PACS1mut+DHSUR2-2	1			PACS1mut+DHSUR2-3	1			X	X	X
PACS1mut+HSUR2-1	0.932761			PACS1mut+HSUR2-2	0.911064			PACS1mut+HSUR2-3	0.914438			X	X	X
PACS1mut+HSUR2mut-17-1	0.794408			PACS1mut+HSUR2mut-17-2	0.69494			PACS1mut+HSUR2mut-17-3	0.638879			X	X	X
YTHDC1mut+DHSUR2-4	1			YTHDC1mut+DHSUR2-5	1			YTHDC1mut+DHSUR2-6	1			X	X	X
YTHDC1mut+HSUR2-4	0.975401			YTHDC1mut+HSUR2-5	0.908806			YTHDC1mut+HSUR2-6	0.853945			X	X	X
YTHDC1mut+HSUR2mut-15-4	0.750443			YTHDC1mut+HSUR2mut-15-5	0.78042			YTHDC1mut+HSUR2mut-15-6	0.776085			X	X	X
X	X	X	X	X	X	X	X	X	X	X	X	X	X	X
X	X	X	X	X	X	X	X	X	X	X	X	X	X	X
