# Supplementary material for: Viral miRNA adaptor differentially recruits miRNAs to target mRNAs through alternative base-pairing
Source: eLife. 2019 Sep 20;8:e50530. doi: 10.7554/eLife.50530 (PMC6763288; doi:10.7554/eLife.50530)
Supplement: Figure 4—source data 1. [file elife-50530-fig4-data1.xlsx]

## Sheet: Sheet1
	Mutant CD69, TP53RK, STK4 and MGA_luciferase_reporters
	Experiment_1_CD69mut_reporter
	1	2	3	Firefly Luciferase	4	5	6		7	8	9	10	11	12
A	X	X	X	CD69mut+DHSUR2-1	106933	112108	113950		X	X	X	X	X	X	A
B	X	X	X	CD69mut+HSUR2-1	78211	80759	82059		X	X	X	X	X	X	B
C	X	X	X	CD69mut+HSUR2mut-1	130244	138425	140038		X	X	X	X	X	X	C
D	X	X	X		X	X	X		X	X	X	X	X	X	D
E	X	X	X		X	X	X		X	X	X	X	X	X	E
F	X	X	X		X	X	X		X	X	X	X	X	X	F
G	X	X	X		X	X	X		X	X	X	X	X	X	G
H	X	X	X		X	X	X		X	X	X	X	X	X	H
				Renilla Luciferase
A	X	X	X	CD69mut+DHSUR2-1	5314319	5500419	5540770		X	X	X	X	X	X	A
B	X	X	X	CD69mut+HSUR2-1	4099663	4169583	4155337		X	X	X	X	X	X	B
C	X	X	X	CD69mut+HSUR2mut-1	8817069	9132521	8983060		X	X	X	X	X	X	C
D	X	X	X		X	X	X		X	X	X	X	X	X	D
E	X	X	X		X	X	X		X	X	X	X	X	X	E
F	X	X	X		X	X	X		X	X	X	X	X	X	F
G	X	X	X		X	X	X		X	X	X	X	X	X	G
H	X	X	X		X	X	X		X	X	X	X	X	X	H
				FF/R Ratios				Mean
A	X	X	X	CD69mut+DHSUR2-1	0.0201217	0.0203817	0.0205657	0.0203564	X	X	X	X	X	X	A
B	X	X	X	CD69mut+HSUR2-1	0.0190774	0.0193686	0.0197479	0.019398	X	X	X	X	X	X	B
C	X	X	X	CD69mut+HSUR2mut-1	0.0147718	0.0151574	0.0155891	0.0151728	X	X	X	X	X	X	C
D	X	X	X						X	X	X	X	X	X	D
E	X	X	X						X	X	X	X	X	X	E
F	X	X	X						X	X	X	X	X	X	F
G	X	X	X						X	X	X	X	X	X	G
H	X	X	X						X	X	X	X	X	X	H
				Relative LUC Activity				Mean
A	X	X	X	CD69mut+DHSUR2-1	0.98847	1.00125	1.01028	1	X	X	X	X	X	X	A
B	X	X	X	CD69mut+HSUR2-1	0.937172	0.951476	0.970107	0.952918	X	X	X	X	X	X	B
C	X	X	X	CD69mut+HSUR2mut-1	0.72566	0.744601	0.76581	0.745357	X	X	X	X	X	X	C
D	X	X	X						X	X	X	X	X	X	D
E	X	X	X						X	X	X	X	X	X	E
F	X	X	X						X	X	X	X	X	X	F
G	X	X	X						X	X	X	X	X	X	G
H	X	X	X						X	X	X	X	X	X	H
	Experiment_2_CD69mut_reporter
	1	2	3	4	5	6	Firefly Luciferase	7	8	9		10	11	12
A	X	X	X	X	X	X	CD69mut+DHSUR2-2	36066	40182	38324		X	X	X	A
B	X	X	X	X	X	X	CD69mut+DHSUR2-3	34739	37545	37222		X	X	X	B
C	X	X	X	X	X	X	CD69mut+HSUR2-2	26030	28005	27183		X	X	X	C
D	X	X	X	X	X	X	CD69mut+HSUR2-4	23460	24832	24390		X	X	X	D
E	X	X	X	X	X	X	CD69mut+HSUR2mut-2	49943	52044	48335		X	X	X	E
F	X	X	X	X	X	X	CD69mut+HSUR2mut-4	59075	62218	61405		X	X	X	F
G	X	X	X	X	X	X		X	X	X		X	X	X	G
H	X	X	X	X	X	X		X	X	X		X	X	X	H
							Renilla Luciferase
A	X	X	X	X	X	X	CD69mut+DHSUR2-2	1143651	1215047	1169306		X	X	X	A
B	X	X	X	X	X	X	CD69mut+DHSUR2-3	912595	1002695	931913		X	X	X	B
C	X	X	X	X	X	X	CD69mut+HSUR2-2	911752	952211	930821		X	X	X	C
D	X	X	X	X	X	X	CD69mut+HSUR2-4	698491	734790	698597		X	X	X	D
E	X	X	X	X	X	X	CD69mut+HSUR2mut-2	2317288	2378336	2313197		X	X	X	E
F	X	X	X	X	X	X	CD69mut+HSUR2mut-4	2470363	2515655	2489421		X	X	X	F
G	X	X	X	X	X	X		X	X	X		X	X	X	G
H	X	X	X	X	X	X		X	X	X		X	X	X	H
							FF/R Ratios				Mean
A	X	X	X	X	X	X	CD69mut+DHSUR2-2	0.0315358	0.0330703	0.032775	0.0324604	X	X	X	A
B	X	X	X	X	X	X	CD69mut+DHSUR2-3	0.0380662	0.0374441	0.0399415	0.0384839	X	X	X	B
C	X	X	X	X	X	X	CD69mut+HSUR2-2	0.0285494	0.0294105	0.0292033	0.0290544	X	X	X	C
D	X	X	X	X	X	X	CD69mut+HSUR2-4	0.0335867	0.0337947	0.0349128	0.0340981	X	X	X	D
E	X	X	X	X	X	X	CD69mut+HSUR2mut-2	0.0215523	0.0218825	0.0208953	0.0214434	X	X	X	E
F	X	X	X	X	X	X	CD69mut+HSUR2mut-4	0.0239135	0.0247323	0.0246664	0.0244374	X	X	X	F
G	X	X	X	X	X	X		X	X	X		X	X	X	G
H	X	X	X	X	X	X		X	X	X		X	X	X	H
							Relative LUC Activity				Mean
A	X	X	X	X	X	X	CD69mut+DHSUR2-2	0.971518	1.01879	1.00969	1	X	X	X	A
B	X	X	X	X	X	X	CD69mut+DHSUR2-3	0.989145	0.97298	1.03787	1	X	X	X	B
C	X	X	X	X	X	X	CD69mut+HSUR2-2	0.879516	0.906043	0.899658	0.895072	X	X	X	C
D	X	X	X	X	X	X	CD69mut+HSUR2-4	0.872746	0.878151	0.907206	0.886034	X	X	X	D
E	X	X	X	X	X	X	CD69mut+HSUR2mut-2	0.663958	0.67413	0.643718	0.660602	X	X	X	E
F	X	X	X	X	X	X	CD69mut+HSUR2mut-4	0.621389	0.642667	0.640953	0.635003	X	X	X	F
G	X	X	X	X	X	X		X	X	X		X	X	X	G
H	X	X	X	X	X	X		X	X	X		X	X	X	H
	Experiment_3_TP53RKmut_reporter
		1	2	3		4	5	6		7	8	9		10	11	12
		Firefly LUC
A	TP53RKmut+DHSUR2-1	22149	23354	22701	TP53RKmut+DHSUR2-2	19721	21434	20518	TP53RKmut+DHSUR2-3	16014	16086	16589	TP53RKmut+DHSUR2-4	19081	20767	21138	A
B	TP53RKmut+HSUR2-1	34093	34304	35274	TP53RKmut+HSUR2-2	25057	26804	25044	TP53RKmut+HSUR2-3	22830	23426	23946	TP53RKmut+HSUR2-4	21421	23092	23246	B
C	TP53RKmut+HSUR2mut-19-1	23423	23645	24672	TP53RKmut+HSUR2mut-19-2	39634	42138	43145	TP53RKmut+HSUR2mut-19-3	48192	53603	53431	TP53RKmut+HSUR2mut-19-4	27411	29838	30554	C
D	X	X	X	X	X	X	X	X	X	X	X	X	X	X	X	X	D
E	X	X	X	X	X	X	X	X	X	X	X	X	X	X	X	X	E
F	X	X	X	X	X	X	X	X	X	X	X	X	X	X	X	X	F
G	X	X	X	X	X	X	X	X	X	X	X	X	X	X	X	X	G
H	X	X	X	X	X	X	X	X	X	X	X	X	X	X	X	X	H
		Renilla LUC
A	TP53RKmut+DHSUR2-1	233621	249196	240500	TP53RKmut+DHSUR2-2	219713	235907	227699	TP53RKmut+DHSUR2-3	167703	170306	174668	TP53RKmut+DHSUR2-4	206035	223655	223149	A
B	TP53RKmut+HSUR2-1	491062	496049	503958	TP53RKmut+HSUR2-2	371945	394535	358717	TP53RKmut+HSUR2-3	257694	259392	265451	TP53RKmut+HSUR2-4	278555	293825	292149	B
C	TP53RKmut+HSUR2mut-19-1	399430	394882	404300	TP53RKmut+HSUR2mut-19-2	812519	834905	835999	TP53RKmut+HSUR2mut-19-3	935363	1047011	997974	TP53RKmut+HSUR2mut-19-4	442842	470638	465725	C
D	X	X	X	X	X	X	X	X	X	X	X	X	X	X	X	X	D
E	X	X	X	X	X	X	X	X	X	X	X	X	X	X	X	X	E
F	X	X	X	X	X	X	X	X	X	X	X	X	X	X	X	X	F
G	X	X	X	X	X	X	X	X	X	X	X	X	X	X	X	X	G
H	X	X	X	X	X	X	X	X	X	X	X	X	X	X	X	X	H
		Ratio
A	TP53RKmut+DHSUR2-1	0.0948074	0.0937174	0.0943909	TP53RKmut+DHSUR2-2	0.089758	0.0908578	0.0901102	TP53RKmut+DHSUR2-3	0.0954902	0.0944535	0.0949745	TP53RKmut+DHSUR2-4	0.0926105	0.0928528	0.0947259	A
B	TP53RKmut+HSUR2-1	0.0694271	0.0691545	0.0699939	TP53RKmut+HSUR2-2	0.0673675	0.0679382	0.0698155	TP53RKmut+HSUR2-3	0.0885934	0.0903112	0.0902087	TP53RKmut+HSUR2-4	0.0769004	0.078591	0.079569	B
C	TP53RKmut+HSUR2mut-19-1	0.0586411	0.0598786	0.061024	TP53RKmut+HSUR2mut-19-2	0.0487792	0.0504704	0.0516089	TP53RKmut+HSUR2mut-19-3	0.0515222	0.0511962	0.0535395	TP53RKmut+HSUR2mut-19-4	0.0618979	0.063399	0.0656052	C
D	X	X	X	X	X	X	X	X	X	X	X	X	X	X	X	X	D
E	X	X	X	X	X	X	X	X	X	X	X	X	X	X	X	X	E
F	X	X	X	X	X	X	X	X	X	X	X	X	X	X	X	X	F
G	X	X	X	X	X	X	X	X	X	X	X	X	X	X	X	X	G
H	X	X	X	X	X	X	X	X	X	X	X	X	X	X	X	X	H
		Relative LUC Activity
A	TP53RKmut+DHSUR2-1	1.00533	0.993767	1.00091	TP53RKmut+DHSUR2-2	0.994637	1.00682	0.998539	TP53RKmut+DHSUR2-3	1.00545	0.994533	1.00002	TP53RKmut+DHSUR2-4	0.991585	0.99418	1.01424	A
B	TP53RKmut+HSUR2-1	0.736196	0.733305	0.742206	TP53RKmut+HSUR2-2	0.74652	0.752845	0.773647	TP53RKmut+HSUR2-3	0.93283	0.950917	0.949838	TP53RKmut+HSUR2-4	0.823377	0.841478	0.851949	B
C	TP53RKmut+HSUR2mut-19-1	0.621822	0.634945	0.64709	TP53RKmut+HSUR2mut-19-2	0.540537	0.559278	0.571895	TP53RKmut+HSUR2mut-19-3	0.542495	0.539062	0.563735	TP53RKmut+HSUR2mut-19-4	0.662744	0.678817	0.702438	C
D	X	X	X	X	X	X	X	X	X	X	X	X	X	X	X	X	D
E	X	X	X	X	X	X	X	X	X	X	X	X	X	X	X	X	E
F	X	X	X	X	X	X	X	X	X	X	X	X	X	X	X	X	F
G	X	X	X	X	X	X	X	X	X	X	X	X	X	X	X	X	G
H	X	X	X	X	X	X	X	X	X	X	X	X	X	X	X	X	H
		Mean
A	TP53RKmut+DHSUR2-1	1			TP53RKmut+DHSUR2-2	1			TP53RKmut+DHSUR2-3	1			TP53RKmut+DHSUR2-4	1			A
B	TP53RKmut+HSUR2-1	0.737236			TP53RKmut+HSUR2-2	0.757671			TP53RKmut+HSUR2-3	0.944528			TP53RKmut+HSUR2-4	0.838934			B
C	TP53RKmut+HSUR2mut-19-1	0.634619			TP53RKmut+HSUR2mut-19-2	0.557237			TP53RKmut+HSUR2mut-19-3	0.548431			TP53RKmut+HSUR2mut-19-4	0.681333			C
D	X	X	X	X	X	X	X	X	X	X	X	X	X	X	X	X	D
E	X	X	X	X	X	X	X	X	X	X	X	X	X	X	X	X	E
F	X	X	X	X	X	X	X	X	X	X	X	X	X	X	X	X	F
G	X	X	X	X	X	X	X	X	X	X	X	X	X	X	X	X	G
H	X	X	X	X	X	X	X	X	X	X	X	X	X	X	X	X	H
	Experiment_4_TP53RKmut_reporter
		1	2	3		4	5	6		7	8	9		10	11	12
		Firefly LUC
A		X	X	X	X	X	X	X	X	X	X	X	X	X	X	X
B		X	X	X	X	X	X	X	X	X	X	X	X	X	X	X
C	TP53RKmut + DHSUR2-5	500478	515417	502183	TP53RKmut + DHSUR2-6	273589	280054	294443	TP53RKmut + DHSUR2-7	282044	289313	288072	TP53RKmut + DHSUR2-8	202301	212840	216206
D	TP53RKmut + HSUR2-5	270140	275162	284351	TP53RKmut + HSUR2-6	223961	225307	227053	TP53RKmut + HSUR2-7	339489	369425	352857	TP53RKmut + HSUR2-8	377059	401505	402177
E	TP53RKmut + HSUR2mut-5	285071	305629	341049	TP53RKmut + HSUR2mut-6	229397	234615	204853	TP53RKmut + HSUR2mut-7	165974	157282	145309	TP53RKmut + HSUR2mut-8	233769	231312	231663
F		X	X	X	X	X	X	X	X	X	X	X	X	X	X	X
G		X	X	X	X	X	X	X	X	X	X	X	X	X	X	X
H		X	X	X	X	X	X	X	X	X	X	X	X	X	X	X
		Renilla LUC
A		X	X	X	X	X	X	X	X	X	X	X	X	X	X	X
B		X	X	X	X	X	X	X	X	X	X	X	X	X	X	X
C	TP53RKmut + DHSUR2-5	2183090	2245366	2196648	TP53RKmut + DHSUR2-6	926206	946947	994683	TP53RKmut + DHSUR2-7	922729	948061	931838	TP53RKmut + DHSUR2-8	686087	716555	718037
D	TP53RKmut + HSUR2-5	765630	816797	835924	TP53RKmut + HSUR2-6	747480	746244	748098	TP53RKmut + HSUR2-7	1235820	1344512	1284896	TP53RKmut + HSUR2-8	1373571	1457427	1447779
E	TP53RKmut + HSUR2mut-5	1900314	2018137	2036136	TP53RKmut + HSUR2mut-6	1021623	1078309	1086398	TP53RKmut + HSUR2mut-7	784146	812372	800627	TP53RKmut + HSUR2mut-8	1112562	1110117	1101888
F		X	X	X	X	X	X	X	X	X	X	X	X	X	X	X
G		X	X	X	X	X	X	X	X	X	X	X	X	X	X	X
H		X	X	X	X	X	X	X	X	X	X	X	X	X	X	X
		Ratio
A		X	X	X	X	X	X	X	X	X	X	X	X	X	X	X
B		X	X	X	X	X	X	X	X	X	X	X	X	X	X	X
C	TP53RKmut + DHSUR2-5	0.229252	0.229547	0.228613	TP53RKmut + DHSUR2-6	0.295387	0.295744	0.296017	TP53RKmut + DHSUR2-7	0.305663	0.305163	0.309144	TP53RKmut + DHSUR2-8	0.294862	0.297032	0.301107
D	TP53RKmut + HSUR2-5	0.352834	0.336879	0.340164	TP53RKmut + HSUR2-6	0.299621	0.301921	0.303507	TP53RKmut + HSUR2-7	0.274707	0.274765	0.274619	TP53RKmut + HSUR2-8	0.27451	0.275489	0.277789
E	TP53RKmut + HSUR2mut-5	0.150013	0.151441	0.167498	TP53RKmut + HSUR2mut-6	0.224542	0.217577	0.188562	TP53RKmut + HSUR2mut-7	0.211662	0.193608	0.181494	TP53RKmut + HSUR2mut-8	0.210118	0.208367	0.210242
F		X	X	X	X	X	X	X	X	X	X	X	X	X	X	X
G		X	X	X	X	X	X	X	X	X	X	X	X	X	X	X
H		X	X	X	X	X	X	X	X	X	X	X	X	X	X	X
		Relative LUC Activity
A		X	X	X	X	X	X	X	X	X	X	X	X	X	X	X
B		X	X	X	X	X	X	X	X	X	X	X	X	X	X	X
C	TP53RKmut + DHSUR2-5	0.229137			TP53RKmut + DHSUR2-6	0.295716			TP53RKmut + DHSUR2-7	0.306657			TP53RKmut + DHSUR2-8	0.297667
D	TP53RKmut + HSUR2-5	0.343292			TP53RKmut + HSUR2-6	0.301683			TP53RKmut + HSUR2-7	0.274697			TP53RKmut + HSUR2-8	0.275929
E	TP53RKmut + HSUR2mut-5	0.156317			TP53RKmut + HSUR2mut-6	0.210227			TP53RKmut + HSUR2mut-7	0.195588			TP53RKmut + HSUR2mut-8	0.209576
F		X	X	X	X	X	X	X	X	X	X	X	X	X	X	X
G		X	X	X	X	X	X	X	X	X	X	X	X	X	X	X
H		X	X	X	X	X	X	X	X	X	X	X	X	X	X	X
		Mean
A		X	X	X	X	X	X	X	X	X	X	X	X	X	X	X
B		X	X	X	X	X	X	X	X	X	X	X	X	X	X	X
C	TP53RKmut + HSUR2mut-8	1			TP53RKmut + DHSUR2-6	1			TP53RKmut + DHSUR2-7	1			TP53RKmut + DHSUR2-8	1
D	TP53RKmut + HSUR2-5	1.49819			TP53RKmut + HSUR2-6	1.02018			TP53RKmut + HSUR2-7	0.898727			TP53RKmut + HSUR2-8	0.926973
E	TP53RKmut + HSUR2mut-5	0.682199			TP53RKmut + HSUR2mut-6	0.710908			TP53RKmut + HSUR2mut-7	0.637809			TP53RKmut + HSUR2mut-8	0.70406
F		X	X	X	X	X	X	X	X	X	X	X	X	X	X	X
G		X	X	X	X	X	X	X	X	X	X	X	X	X	X	X
H		X	X	X	X	X	X	X	X	X	X	X	X	X	X	X
	Experiment_5_STK4mut_reporter
	Firefly LUC Activity	1	2	3		4	5	6		7	8	9		10	11	12
A	STK4mut+DHSUR2-1	206257	215879	216917	STK4mut+DHSUR2-2	151652	165851	166855	STK4mut+DHSUR2-3	63377	68861	68282	STK4mut+DHSUR2-4	110692	116931	117723	A
B	STK4mut+HSUR2-1	119799	125689	125714	STK4mut+HSUR2-2	130565	136019	138777	STK4mut+HSUR2-3	12578	13727	13695	STK4mut+HSUR2-4	103959	111427	113090	B
C	STK4mut+HSUR2mut-18-1	99123	106709	106824	STK4mut+HSUR2mut-18-2	114093	124773	123714	STK4mut+HSUR2mut-18-3	136878	148812	150664	STK4mut+HSUR2mut-18-4	206980	96730	97899	C
D	X	X	X	X		X	X	X		X	X	X		X	X	X	D
E	X	X	X	X		X	X	X		X	X	X		X	X	X	E
F	X	X	X	X		X	X	X		X	X	X		X	X	X	F
G	X	X	X	X		X	X	X		X	X	X		X	X	X	G
H	X	X	X	X		X	X	X		X	X	X		X	X	X	H
	Renilla LUC Activity
A	STK4mut+DHSUR2-1	768912	807802	806286	STK4mut+DHSUR2-2	523236	571776	570309	STK4mut+DHSUR2-3	197437	209652	204554	STK4mut+DHSUR2-4	348244	368285	361491	A
B	STK4mut+HSUR2-1	459774	487009	485022	STK4mut+HSUR2-2	467541	487153	488274	STK4mut+HSUR2-3	35917	41079	41352	STK4mut+HSUR2-4	342999	367689	365829	B
C	STK4mut+HSUR2mut-18-1	475127	509058	497240	STK4mut+HSUR2mut-18-2	527640	563600	551228	STK4mut+HSUR2mut-18-3	519296	583763	576149	STK4mut+HSUR2mut-18-4	886805	382230	382931	C
D	X	X	X	X		X	X	X		X	X	X		X	X	X	D
E	X	X	X	X		X	X	X		X	X	X		X	X	X	E
F	X	X	X	X		X	X	X		X	X	X		X	X	X	F
G	X	X	X	X		X	X	X		X	X	X		X	X	X	G
H	X	X	X	X		X	X	X		X	X	X		X	X	X	H
	Ratio
A	STK4mut+DHSUR2-1	0.268245	0.267242	0.269032	STK4mut+DHSUR2-2	0.289835	0.290063	0.292569	STK4mut+DHSUR2-3	0.320999	0.328454	0.333809	STK4mut+DHSUR2-4	0.317858	0.317501	0.32566	A
B	STK4mut+HSUR2-1	0.260561	0.258084	0.259192	STK4mut+HSUR2-2	0.279259	0.279212	0.28422	STK4mut+HSUR2-3	0.350196	0.334161	0.331181	STK4mut+HSUR2-4	0.303088	0.303047	0.309134	B
C	STK4mut+HSUR2mut-18-1	0.208624	0.209621	0.214834	STK4mut+HSUR2mut-18-2	0.216233	0.221386	0.224433	STK4mut+HSUR2mut-18-3	0.263584	0.254919	0.261502	STK4mut+HSUR2mut-18-4	0.2334	0.253068	0.255657	C
D	X	X	X	X		X	X	X		X	X	X		X	X	X	D
E	X	X	X	X		X	X	X		X	X	X		X	X	X	E
F	X	X	X	X		X	X	X		X	X	X		X	X	X	F
G	X	X	X	X		X	X	X		X	X	X		X	X	X	G
H	X	X	X	X		X	X	X		X	X	X		X	X	X	H
	Relative LUC Activity
A	STK4mut+DHSUR2-1	1.00027	0.996529	1.0032	STK4mut+DHSUR2-2	0.996604	0.997388	1.00601	STK4mut+DHSUR2-3	0.979389	1.00214	1.01848	STK4mut+DHSUR2-4	0.992252	0.99114	1.01661	A
B	STK4mut+HSUR2-1	0.971613	0.962376	0.966511	STK4mut+HSUR2-2	0.960239	0.960078	0.977296	STK4mut+HSUR2-3	1.06847	1.01955	1.01046	STK4mut+HSUR2-4	0.946147	0.946018	0.965018	B
C	STK4mut+HSUR2mut-18-1	0.777945	0.78166	0.801101	STK4mut+HSUR2mut-18-2	0.743521	0.76124	0.77172	STK4mut+HSUR2mut-18-3	0.804213	0.777774	0.79786	STK4mut+HSUR2mut-18-4	0.728601	0.789998	0.798081	C
D	X	X	X	X		X	X	X		X	X	X		X	X	X	D
E	X	X	X	X		X	X	X		X	X	X		X	X	X	E
F	X	X	X	X		X	X	X		X	X	X		X	X	X	F
G	X	X	X	X		X	X	X		X	X	X		X	X	X	G
H	X	X	X	X		X	X	X		X	X	X		X	X	X	H
	Mean
A	STK4mut+DHSUR2-1	1			STK4mut+DHSUR2-2	1			STK4mut+DHSUR2-3	1			STK4mut+DHSUR2-4	1			A
B	STK4mut+HSUR2-1	0.966833			STK4mut+HSUR2-2	0.965871			STK4mut+HSUR2-3	1.03283			STK4mut+HSUR2-4	0.952394			B
C	STK4mut+HSUR2mut-18-1	0.786902			STK4mut+HSUR2mut-18-2	0.758827			STK4mut+HSUR2mut-18-3	0.793282			STK4mut+HSUR2mut-18-4	0.772227			C
D	X	X	X	X		X	X	X		X	X	X		X	X	X	D
E	X	X	X	X		X	X	X		X	X	X		X	X	X	E
F	X	X	X	X		X	X	X		X	X	X		X	X	X	F
G	X	X	X	X		X	X	X		X	X	X		X	X	X	G
H	X	X	X	X		X	X	X		X	X	X		X	X	X	H
	Experiment_6_MGA_reporter
	Firefly LUC Activity	1	2	3		4	5	6		7	8	9		10	11	12
A	MGAmut + DHSUR2-1	9625	10114	10432	MGAmut + DHSUR2-2	18290	18480	19171	MGAmut + DHSUR2-3	17342	17502	17841	MGAmut + DHSUR2-4	16685	17661	18200	A
B	MGAmut + HSUR2-1	29306	30497	31509	MGAmut + HSUR2-2	15497	16210	16333	MGAmut + HSUR2-3	12680	12998	13024	MGAmut + HSUR2-4	21578	21929	22356	B
C	MGAmut + HSUR2mut-1	17249	17711	18131	MGAmut + HSUR2mut-2	28593	29886	31272	MGAmut + HSUR2mut-3	32134	33286	34047	MGAmut + HSUR2mut-4	37531	37914	38858	C
D	X	X	X	X		X	X	X		X	X	X		X	X	X	D
E	X	X	X	X		X	X	X		X	X	X		X	X	X	E
F	X	X	X	X		X	X	X		X	X	X		X	X	X	F
G	X	X	X	X		X	X	X		X	X	X		X	X	X	G
H	X	X	X	X		X	X	X		X	X	X		X	X	X	H
	Renilla LUC Activity
A	MGAmut + DHSUR2-1	60058	62623	62812	MGAmut + DHSUR2-2	121255	122425	121765	MGAmut + DHSUR2-3	110621	110239	109153	MGAmut + DHSUR2-4	99995	102935	103375	A
B	MGAmut + HSUR2-1	199092	206808	203612	MGAmut + HSUR2-2	101562	106221	105621	MGAmut + HSUR2-3	82785	86695	84703	MGAmut + HSUR2-4	146020	148226	148141	B
C	MGAmut + HSUR2mut-1	139682	145844	143529	MGAmut + HSUR2mut-2	218199	228871	229405	MGAmut + HSUR2mut-3	252708	261028	256296	MGAmut + HSUR2mut-4	298520	296439	294732	C
D	X	X	X	X		X	X	X		X	X	X		X	X	X	D
E	X	X	X	X		X	X	X		X	X	X		X	X	X	E
F	X	X	X	X		X	X	X		X	X	X		X	X	X	F
G	X	X	X	X		X	X	X		X	X	X		X	X	X	G
H	X	X	X	X		X	X	X		X	X	X		X	X	X	H
	Ratio
A	MGAmut + DHSUR2-1	0.160262	0.161506	0.166083	MGAmut + DHSUR2-2	0.150839	0.15095	0.157443	MGAmut + DHSUR2-3	0.15677	0.158764	0.163449	MGAmut + DHSUR2-4	0.166858	0.171574	0.176058	A
B	MGAmut + HSUR2-1	0.147198	0.147465	0.15475	MGAmut + HSUR2-2	0.152587	0.152606	0.154638	MGAmut + HSUR2-3	0.153168	0.149928	0.153761	MGAmut + HSUR2-4	0.147774	0.147943	0.15091	B
C	MGAmut + HSUR2mut-1	0.123488	0.121438	0.126323	MGAmut + HSUR2mut-2	0.131041	0.13058	0.136318	MGAmut + HSUR2mut-3	0.127159	0.127519	0.132842	MGAmut + HSUR2mut-4	0.125724	0.127898	0.131842	C
D	X	X	X	X		X	X	X		X	X	X		X	X	X	D
E	X	X	X	X		X	X	X		X	X	X		X	X	X	E
F	X	X	X	X		X	X	X		X	X	X		X	X	X	F
G	X	X	X	X		X	X	X		X	X	X		X	X	X	G
H	X	X	X	X		X	X	X		X	X	X		X	X	X	H
	Relative LUC Activity
A	MGAmut + DHSUR2-1	0.985517	0.993169	1.02131	MGAmut + DHSUR2-2	0.98538	0.986101	1.02852	MGAmut + DHSUR2-3	0.98189	0.994382	1.02373	MGAmut + DHSUR2-4	0.972953	1.00045	1.0266	A
B	MGAmut + HSUR2-1	0.905184	0.906826	0.951624	MGAmut + HSUR2-2	0.996796	0.996925	1.0102	MGAmut + HSUR2-3	0.959331	0.939039	0.963045	MGAmut + HSUR2-4	0.861673	0.862657	0.879959	B
C	MGAmut + HSUR2mut-1	0.759377	0.746773	0.776813	MGAmut + HSUR2mut-2	0.856045	0.853035	0.890518	MGAmut + HSUR2mut-3	0.796429	0.798685	0.832028	MGAmut + HSUR2mut-4	0.733095	0.745775	0.768771	C
D	X	X	X	X		X	X	X		X	X	X		X	X	X	D
E	X	X	X	X		X	X	X		X	X	X		X	X	X	E
F	X	X	X	X		X	X	X		X	X	X		X	X	X	F
G	X	X	X	X		X	X	X		X	X	X		X	X	X	G
H	X	X	X	X		X	X	X		X	X	X		X	X	X	H
	Mean
A	MGAmut + DHSUR2-1	1			MGAmut + DHSUR2-2	1			MGAmut + DHSUR2-3	1			MGAmut + DHSUR2-4	1			A
B	MGAmut + HSUR2-1	0.921211			MGAmut + HSUR2-2	1.00131			MGAmut + HSUR2-3	0.953805			MGAmut + HSUR2-4	0.868097			B
C	MGAmut + HSUR2mut-1	0.760988			MGAmut + HSUR2mut-2	0.866533			MGAmut + HSUR2mut-3	0.809047			MGAmut + HSUR2mut-4	0.749214			C
D	X	X	X	X		X	X	X		X	X	X		X	X	X	D
E	X	X	X	X		X	X	X		X	X	X		X	X	X	E
F	X	X	X	X		X	X	X		X	X	X		X	X	X	F
G	X	X	X	X		X	X	X		X	X	X		X	X	X	G
H	X	X	X	X		X	X	X		X	X	X		X	X	X	H
	Experiment_7_TP53RK
	Firefly LUC Activity	1	2	3		4	5	6		7	8	9		10	11	12
A	TP53RKmut + DHSUR2-9	78761	81447	81198	TP53RKmut + DHSUR2-10	23108	24837	24691	TP53RKmut + DHSUR2-11	17643	19741	19355		X	X	X	A
B	TP53RKmut + HSUR2-9	26090	25083	26204	TP53RKmut + HSUR2-10	22776	24128	24376	TP53RKmut + HSUR2-11	26384	25289	26108		X	X	X	B
C	X	X	X	X		X	X	X		X	X	X		X	X	X	C
D	X	X	X	X		X	X	X		X	X	X		X	X	X	D
E	X	X	X	X		X	X	X		X	X	X		X	X	X	E
F	X	X	X	X		X	X	X		X	X	X		X	X	X	F
G	X	X	X	X		X	X	X		X	X	X		X	X	X	G
H	X	X	X	X		X	X	X		X	X	X		X	X	X	H
	Renilla LUC Activity
A	TP53RKmut + DHSUR2-9	1469279	1503883	1511303	TP53RKmut + DHSUR2-10	408193	441609	432425	TP53RKmut + DHSUR2-11	292978	324130	316366		X	X	X	A
B	TP53RKmut + HSUR2-9	472183	448255	468638	TP53RKmut + HSUR2-10	427828	452724	452659	TP53RKmut + HSUR2-11	427976	443073	425428		X	X	X	B
C	X	X	X	X		X	X	X		X	X	X		X	X	X	C
D	X	X	X	X		X	X	X		X	X	X		X	X	X	D
E	X	X	X	X		X	X	X		X	X	X		X	X	X	E
F	X	X	X	X		X	X	X		X	X	X		X	X	X	F
G	X	X	X	X		X	X	X		X	X	X		X	X	X	G
H	X	X	X	X		X	X	X		X	X	X		X	X	X	H
	Ratio
A	TP53RKmut + DHSUR2-9	0.0536052	0.0541578	0.0537271	TP53RKmut + DHSUR2-10	0.0566105	0.0562421	0.0570989	TP53RKmut + DHSUR2-11	0.0602195	0.0609046	0.0611791		X	X	X	A
B	TP53RKmut + HSUR2-9	0.055254	0.055957	0.0559152	TP53RKmut + HSUR2-10	0.0532363	0.0532952	0.0538507	TP53RKmut + HSUR2-11	0.0616483	0.0570764	0.0613688		X	X	X	B
C	X	X	X	X		X	X	X		X	X	X		X	X	X	C
D	X	X	X	X		X	X	X		X	X	X		X	X	X	D
E	X	X	X	X		X	X	X		X	X	X		X	X	X	E
F	X	X	X	X		X	X	X		X	X	X		X	X	X	F
G	X	X	X	X		X	X	X		X	X	X		X	X	X	G
H	X	X	X	X		X	X	X		X	X	X		X	X	X	H
	Relative LUC Activity
A	TP53RKmut + DHSUR2-9	0.995823	1.00609	0.998088	TP53RKmut + DHSUR2-10	0.999294	0.99279	1.00792	TP53RKmut + DHSUR2-11	0.990979	1.00225	1.00677		X	X	X	A
B	TP53RKmut + HSUR2-9	1.02645	1.03951	1.03874	TP53RKmut + HSUR2-10	0.939733	0.940772	0.950578	TP53RKmut + HSUR2-11	1.01449	0.939254	1.00989		X	X	X	B
C	X	X	X	X		X	X	X		X	X	X		X	X	X	C
D	X	X	X	X		X	X	X		X	X	X		X	X	X	D
E	X	X	X	X		X	X	X		X	X	X		X	X	X	E
F	X	X	X	X		X	X	X		X	X	X		X	X	X	F
G	X	X	X	X		X	X	X		X	X	X		X	X	X	G
H	X	X	X	X		X	X	X		X	X	X		X	X	X	H
	Mean
A	TP53RKmut + DHSUR2-9	1			TP53RKmut + DHSUR2-10	1			TP53RKmut + DHSUR2-11	1				X	X	X	A
B	TP53RKmut + HSUR2-9	1.0349			TP53RKmut + HSUR2-10	0.943694			TP53RKmut + HSUR2-11	0.987879				X	X	X	B
C	X	X	X	X		X	X	X		X	X	X		X	X	X	C
D	X	X	X	X		X	X	X		X	X	X		X	X	X	D
E	X	X	X	X		X	X	X		X	X	X		X	X	X	E
F	X	X	X	X		X	X	X		X	X	X		X	X	X	F
G	X	X	X	X		X	X	X		X	X	X		X	X	X	G
H	X	X	X	X		X	X	X		X	X	X		X	X	X	H
