# Supplementary material for: Viral miRNA adaptor differentially recruits miRNAs to target mRNAs through alternative base-pairing
Source: eLife. 2019 Sep 20;8:e50530. doi: 10.7554/eLife.50530 (PMC6763288; doi:10.7554/eLife.50530)
Supplement: Figure 5—source data 1. [file elife-50530-fig5-data1.xlsx]

## Sheet: Sheet1
	AltbsTP53Rkmut & altbsPACS1mut_reporters
		1	2	3		4	5	6		7	8	9		10	11	12
		Firefly LUC
A	altbsTP53RKmut+DHSUR2-1	164022	157567	165069	altbsTP53RKmut+DHSUR2-2	120694	118274	122493	altbsTP53RKmut+DHSUR2-3	124079	121365	140209	X	X	X	X	A
B	altbsTP53RKmut+HSUR2-1	196795	195806	202606	altbsTP53RKmut+HSUR2-2	165011	170074	187126	altbsTP53RKmut+HSUR2-3	152717	160991	173957	X	X	X	X	B
C	altbsTP53RKmut+HSUR2altbsTP53RK-1	125757	123286	126374	altbsTP53RKmut+HSUR2altbsTP53RK-2	117675	120361	122125	altbsTP53RKmut+HSUR2altbsTP53RK-3	253492	243441	277233	X	X	X	X	C
D	altbsPACS1mut+DHSUR2-1	131874	132481	135830	altbsPACS1mut+DHSUR2-2	124101	118759	134836	altbsPACS1mut+DHSUR2-3	126189	124141	126761	X	X	X	X	D
E	altbsPACS1mut+HSUR2-1	160605	168660	170521	altbsPACS1mut+HSUR2-2	173417	173809	178993	altbsPACS1mut+HSUR2-3	161601	164198	161915	X	X	X	X	E
F	altbsPACS1mut+HSUR2altbsPACS1-1	277128	267297	287517	altbsPACS1mut+HSUR2altbsPACS1-2	289669	281046	328753	altbsPACS1mut+HSUR2altbsPACS1-3	119323	120657	119570	X	X	X	X	F
G	X	X	X	X	X	X	X	X	X	X	X	X	X	X	X	X	G
H	X	X	X	X	X	X	X	X	X	X	X	X	X	X	X	X	H
		Renilla LUC
A	altbsTP53RKmut+DHSUR2-1	801068	775356	800714	altbsTP53RKmut+DHSUR2-2	607343	587242	593537	altbsTP53RKmut+DHSUR2-3	619617	593062	652161	X	X	X	X	A
B	altbsTP53RKmut+HSUR2-1	1260131	1251855	1256072	altbsTP53RKmut+HSUR2-2	1247606	1322330	1392805	altbsTP53RKmut+HSUR2-3	1259163	1316471	1222452	X	X	X	X	B
C	altbsTP53RKmut+HSUR2altbsTP53RK-1	542094	529757	540601	altbsTP53RKmut+HSUR2altbsTP53RK-2	553430	559635	559753	altbsTP53RKmut+HSUR2altbsTP53RK-3	1431753	1345859	1504661	X	X	X	X	C
D	altbsPACS1mut+DHSUR2-1	525535	528044	538298	altbsPACS1mut+DHSUR2-2	465827	439923	496743	altbsPACS1mut+DHSUR2-3	477251	474022	482713	X	X	X	X	D
E	altbsPACS1mut+HSUR2-1	927353	957955	962926	altbsPACS1mut+HSUR2-2	1132722	1128324	1143770	altbsPACS1mut+HSUR2-3	949399	960176	943752	X	X	X	X	E
F	altbsPACS1mut+HSUR2altbsPACS1-1	1215297	1167331	1253326	altbsPACS1mut+HSUR2altbsPACS1-2	1221383	1170119	1380110	altbsPACS1mut+HSUR2altbsPACS1-3	432203	440110	433056	X	X	X	X	F
G	X	X	X	X	X	X	X	X	X	X	X	X	X	X	X	X	G
H	X	X	X	X	X	X	X	X	X	X	X	X	X	X	X	X	H
		Ratio
A	altbsTP53RKmut+DHSUR2-1	0.204754	0.203219	0.206152	altbsTP53RKmut+DHSUR2-2	0.198725	0.201406	0.206378	altbsTP53RKmut+DHSUR2-3	0.200251	0.204641	0.214991	X	X	X	X	A
B	altbsTP53RKmut+HSUR2-1	0.15617	0.156413	0.161301	altbsTP53RKmut+HSUR2-2	0.132262	0.128617	0.134352	altbsTP53RKmut+HSUR2-3	0.121285	0.12229	0.142302	X	X	X	X	B
C	altbsTP53RKmut+HSUR2altbsTP53RK-1	0.231984	0.232722	0.233766	altbsTP53RKmut+HSUR2altbsTP53RK-2	0.212629	0.215071	0.218177	altbsTP53RKmut+HSUR2altbsTP53RK-3	0.17705	0.180882	0.184249	X	X	X	X	C
D	altbsPACS1mut+DHSUR2-1	0.250933	0.25089	0.252332	altbsPACS1mut+DHSUR2-2	0.26641	0.269954	0.27144	altbsPACS1mut+DHSUR2-3	0.264408	0.261889	0.262601	X	X	X	X	D
E	altbsPACS1mut+HSUR2-1	0.173186	0.176063	0.177086	altbsPACS1mut+HSUR2-2	0.153098	0.154042	0.156494	altbsPACS1mut+HSUR2-3	0.170214	0.171008	0.171565	X	X	X	X	E
F	altbsPACS1mut+HSUR2altbsPACS1-1	0.228033	0.228981	0.229403	altbsPACS1mut+HSUR2altbsPACS1-2	0.237165	0.240186	0.238208	altbsPACS1mut+HSUR2altbsPACS1-3	0.276081	0.274152	0.276107	X	X	X	X	F
G	X	X	X	X	X	X	X	X	X	X	X	X	X	X	X	X	G
H	X	X	X	X	X	X	X	X	X	X	X	X	X	X	X	X	H
		Relative LUC Activity
A	altbsTP53RKmut+DHSUR2-1	1.00022	0.992724	1.00705	altbsTP53RKmut+DHSUR2-2	0.98296	0.996223	1.02082	altbsTP53RKmut+DHSUR2-3	0.969139	0.990386	1.04048	X	X	X	X	A
B	altbsTP53RKmut+HSUR2-1	0.762891	0.764075	0.787956	altbsTP53RKmut+HSUR2-2	0.654214	0.636184	0.664551	altbsTP53RKmut+HSUR2-3	0.586971	0.591836	0.688686	X	X	X	X	B
C	altbsTP53RKmut+HSUR2altbsTP53RK-1	1.13324	1.13685	1.14194	altbsTP53RKmut+HSUR2altbsTP53RK-2	1.05173	1.06381	1.07918	altbsTP53RKmut+HSUR2altbsTP53RK-3	0.856855	0.875397	0.891697	X	X	X	X	C
D	altbsPACS1mut+DHSUR2-1	0.998201	0.998031	1.00377	altbsPACS1mut+DHSUR2-2	0.989386	1.00255	1.00807	altbsPACS1mut+DHSUR2-3	1.00548	0.995903	0.998613	X	X	X	X	D
E	altbsPACS1mut+HSUR2-1	0.688929	0.70037	0.704442	altbsPACS1mut+HSUR2-2	0.568569	0.572076	0.581182	altbsPACS1mut+HSUR2-3	0.647285	0.650306	0.652424	X	X	X	X	E
F	altbsPACS1mut+HSUR2altbsPACS1-1	0.907107	0.910879	0.912557	altbsPACS1mut+HSUR2altbsPACS1-2	0.880776	0.891995	0.884649	altbsPACS1mut+HSUR2altbsPACS1-3	1.04987	1.04254	1.04997	X	X	X	X	F
G	X	X	X	X	X	X	X	X	X	X	X	X	X	X	X	X	G
H	X	X	X	X	X	X	X	X	X	X	X	X	X	X	X	X	H
		Mean
A	altbsTP53RKmut+DHSUR2-1	1			altbsTP53RKmut+DHSUR2-2	1			altbsTP53RKmut+DHSUR2-3	1			X	X	X	X	A
B	altbsTP53RKmut+HSUR2-1	0.771641			altbsTP53RKmut+HSUR2-2	0.651649			altbsTP53RKmut+HSUR2-3	0.622497			X	X	X	X	B
C	altbsTP53RKmut+HSUR2altbsTP53RK-1	1.13734			altbsTP53RKmut+HSUR2altbsTP53RK-2	1.06491			altbsTP53RKmut+HSUR2altbsTP53RK-3	0.874649			X	X	X	X	C
D	altbsPACS1mut+DHSUR2-1	1	X	X	altbsPACS1mut+DHSUR2-2	1	X	X	altbsPACS1mut+DHSUR2-3	1	X	X	X	X	X	X	D
E	altbsPACS1mut+HSUR2-1	0.697914	X	X	altbsPACS1mut+HSUR2-2	0.573942	X	X	altbsPACS1mut+HSUR2-3	0.650005	X	X	X	X	X	X	E
F	altbsPACS1mut+HSUR2altbsPACS1-1	0.910181	X	X	altbsPACS1mut+HSUR2altbsPACS1-2	0.885807	X	X	altbsPACS1mut+HSUR2altbsPACS1-3	1.04746	X	X	X	X	X	X	F
G	X	X	X	X	X	X	X	X	X	X	X	X	X	X	X	X	G
H	X	X	X	X	X	X	X	X	X	X	X	X	X	X	X	X	H
