# Supplementary material for: Viral miRNA adaptor differentially recruits miRNAs to target mRNAs through alternative base-pairing
Source: eLife. 2019 Sep 20;8:e50530. doi: 10.7554/eLife.50530 (PMC6763288; doi:10.7554/eLife.50530)
Supplement: Figure 6—figure supplement 2—source data 1. [file elife-50530-fig6-figsupp2-data1.xlsx]

## Sheet: Sheet1
			Two million stable U937 luciferase reporter cells were nucleofected each with 3 µg of GFP-DHSUR2 or GFP-HSUR2 plus 50 pmoles of either control LNA or anti-miR-142-3p or anti-miR-16 using Amaxa's kit V and program T-020.
			Cells were grown in complete media (plus puromycin & blasticidin) overnight at 37°C/5% CO2 and 30,000 cells were sorted into eppendorf tubes. Extracts were prepared with 50 µl of PBL and 10 µl samples were assayed with 50 µl
			each of firefly and renilla luciferase substrates.
	Experiment_1
	FireFly LUC Activity	1	2	3		4	5	6		7	8	9	10	11	12
A	MGA+DHSUR2+control LNA_1	48730	51550	52498		X	X	X	STK4+DHSUR2+control LNA_1	52955	58000	57573	X	X	X	A
B	MGA+DHSUR2+miR142-3p LNA_1	30945	32967	32933		X	X	X	STK4+DHSUR2+miR142-3p LNA_1	47784	49993	49809	X	X	X	B
C	MGA+DHSUR2+miR16 LNA_1	27597	29599	30318		X	X	X	STK4+DHSUR2+miR16 LNA_1	88982	92450	93754	X	X	X	C
D	MGA+HSUR2+control LNA_1	66523	66978	64975		X	X	X	STK4+HSUR2+control LNA_1	59393	64843	64036	X	X	X	D
E	MGA+HSUR2+miR142-3p LNA_1	53107	54989	56162		X	X	X	STK4+HSUR2+miR142-3p LNA_1	47916	51771	51531	X	X	X	E
F	MGA+HSUR2+miR16 LNA_1	56657	60000	57732		X	X	X	STK4+HSUR2+miR16 LNA_1	115414	127181	123184	X	X	X	F
G	X	X	X	X		X	X	X		X	X	X	X	X	X	G
H	X	X	X	X		X	X	X		X	X	X	X	X	X	H
	Renilla LUC Activity
A	MGA+DHSUR2+control LNA_1	261653	279367	286398		X	X	X	STK4+DHSUR2+control LNA_1	531212	617386	596011	X	X	X	A
B	MGA+DHSUR2+miR142-3p LNA_1	122456	132639	129803		X	X	X	STK4+DHSUR2+miR142-3p LNA_1	395946	416629	414048	X	X	X	B
C	MGA+DHSUR2+miR16 LNA_1	102363	111685	111592		X	X	X	STK4+DHSUR2+miR16 LNA_1	906776	940888	950429	X	X	X	C
D	MGA+HSUR2+control LNA_1	469436	453574	436398		X	X	X	STK4+HSUR2+control LNA_1	896067	965695	962785	X	X	X	D
E	MGA+HSUR2+miR142-3p LNA_1	282024	306010	311031		X	X	X	STK4+HSUR2+miR142-3p LNA_1	550164	604386	587500	X	X	X	E
F	MGA+HSUR2+miR16 LNA_1	281894	303268	288589		X	X	X	STK4+HSUR2+miR16 LNA_1	1451515	1632613	1571122	X	X	X	F
G	X	X	X	X		X	X	X		X	X	X	X	X	X	G
H	X	X	X	X		X	X	X		X	X	X	X	X	X	H
	LUC ratios
A	MGA+DHSUR2+control LNA_1	0.186239	0.184524	0.183304		X	X	X	STK4+DHSUR2+control LNA_1	0.0996871	0.0939445	0.0965972	X	X	X	A
B	MGA+DHSUR2+miR142-3p LNA_1	0.252703	0.248547	0.253715		X	X	X	STK4+DHSUR2+miR142-3p LNA_1	0.120683	0.119994	0.120298	X	X	X	B
C	MGA+DHSUR2+miR16 LNA_1	0.269599	0.265022	0.271686		X	X	X	STK4+DHSUR2+miR16 LNA_1	0.0981301	0.0982582	0.0986439	X	X	X	C
D	MGA+HSUR2+control LNA_1	0.141708	0.147667	0.148889		X	X	X	STK4+HSUR2+control LNA_1	0.0662819	0.0671465	0.0665112	X	X	X	D
E	MGA+HSUR2+miR142-3p LNA_1	0.188307	0.179697	0.180567		X	X	X	STK4+HSUR2+miR142-3p LNA_1	0.087094	0.0856588	0.0877123	X	X	X	E
F	MGA+HSUR2+miR16 LNA_1	0.200987	0.197845	0.200049		X	X	X	STK4+HSUR2+miR16 LNA_1	0.0795128	0.0779003	0.0784051	X	X	X	F
G	X	X	X	X		X	X	X		X	X	X	X	X	X	G
H	X	X	X	X		X	X	X		X	X	X	X	X	X	H
	Relative LUC Activity
A	MGA+DHSUR2+control LNA_1	1.00839	0.999107	0.992502		X	X	X	STK4+DHSUR2+control LNA_1	1.03043	0.971073	0.998494	X	X	X	A
B	MGA+DHSUR2+miR142-3p LNA_1	1.36826	1.34576	1.37374		X	X	X	STK4+DHSUR2+miR142-3p LNA_1	1.24746	1.24034	1.24348	X	X	X	B
C	MGA+DHSUR2+miR16 LNA_1	1.45975	1.43496	1.47104		X	X	X	STK4+DHSUR2+miR16 LNA_1	1.01434	1.01566	1.01965	X	X	X	C
D	MGA+HSUR2+control LNA_1	0.76728	0.799544	0.806161		X	X	X	STK4+HSUR2+control LNA_1	0.685134	0.694071	0.687505	X	X	X	D
E	MGA+HSUR2+miR142-3p LNA_1	1.01959	0.972968	0.977681		X	X	X	STK4+HSUR2+miR142-3p LNA_1	0.900262	0.885427	0.906654	X	X	X	E
F	MGA+HSUR2+miR16 LNA_1	1.08824	1.07123	1.08317		X	X	X	STK4+HSUR2+miR16 LNA_1	0.821898	0.80523	0.810448	X	X	X	F
G	X	X	X	X		X	X	X		X	X	X	X	X	X	G
H	X	X	X	X		X	X	X		X	X	X	X	X	X	H
	Mean
A	MGA+DHSUR2+control LNA_1	1				X	X	X	STK4+DHSUR2+control LNA_1	1			X	X	X	A
B	MGA+DHSUR2+miR142-3p LNA_1	1.36259				X	X	X	STK4+DHSUR2+miR142-3p LNA_1	1.24376			X	X	X	B
C	MGA+DHSUR2+miR16 LNA_1	1.45525				X	X	X	STK4+DHSUR2+miR16 LNA_1	1.01655			X	X	X	C
D	MGA+HSUR2+control LNA_1	0.790995				X	X	X	STK4+HSUR2+control LNA_1	0.688903			X	X	X	D
E	MGA+HSUR2+miR142-3p LNA_1	0.990079				X	X	X	STK4+HSUR2+miR142-3p LNA_1	0.897448			X	X	X	E
F	MGA+HSUR2+miR16 LNA_1	1.08088				X	X	X	STK4+HSUR2+miR16 LNA_1	0.812525			X	X	X	F
G	X	X	X	X		X	X	X		X	X	X	X	X	X	G
H	X	X	X	X		X	X	X		X	X	X	X	X	X	H
	Experiment_2
	Firefly LUC	1	2	3		4	5	6		7	8	9		10	11	12
A	MGA+DHSUR2+control LNA_2	72678	77961	77263		X	X	X	STK4+DHSUR2+control LNA_2	46426	50978	50820		X	X	X	A
B	MGA+DHSUR2+miR-142-3p LNA_2	67537	70241	74256		X	X	X	STK4+DHSUR2+miR142-3p LNA_2	41765	44552	46307		X	X	X	B
C	MGA+DHSUR2+miR-16 LNA_2	58658	63439	63373		X	X	X	STK4+DHSUR2+miR16 LNA_2	50508	53230	52230		X	X	X	C
D	MGA+HSUR2+control LNA_2	88461	82231	88682		X	X	X	STK4+HSUR2+control LNA_2	74853	83006	81500		X	X	X	D
E	MGA+HSUR2+miR-142-3p LNA_2	100026	103335	98330		X	X	X	STK4+HSUR2+miR142-3p LNA_2	73249	77857	77029		X	X	X	E
F	MGA+HSUR2+miR-16 LNA_2	81846	86110	86539		X	X	X	STK4+HSUR2+miR16 LNA_2	66437	65726	69349		X	X	X	F
G	X	X	X	X		X	X	X		X	X	X		X	X	X	G
H	X	X	X	X		X	X	X		X	X	X		X	X	X	H
	Renilla LUC
A	MGA+DHSUR2+control LNA_2	491070	530880	521590		X	X	X	STK4+DHSUR2+control LNA_2	287004	310013	303126		X	X	X	A
B	MGA+DHSUR2+miR-142-3p LNA_2	460010	478560	505240		X	X	X	STK4+DHSUR2+miR142-3p LNA_2	223456	236673	246183		X	X	X	B
C	MGA+DHSUR2+miR-16 LNA_2	344340	373350	369880		X	X	X	STK4+DHSUR2+miR16 LNA_2	258993	272553	267981		X	X	X	C
D	MGA+HSUR2+control LNA_2	893730	855760	905580		X	X	X	STK4+HSUR2+control LNA_2	619610	674772	652713		X	X	X	D
E	MGA+HSUR2+miR-142-3p LNA_2	743990	779160	727040		X	X	X	STK4+HSUR2+miR142-3p LNA_2	444510	477715	467847		X	X	X	E
F	MGA+HSUR2+miR-16 LNA_2	609860	647040	643640		X	X	X	STK4+HSUR2+miR16 LNA_2	419921	413187	432468		X	X	X	F
G	X	X	X	X		X	X	X		X	X	X		X	X	X	G
H	X	X	X	X		X	X	X		X	X	X		X	X	X	H
	Ratio
A	MGA+DHSUR2+control LNA_2	0.147999	0.146852	0.14813		X	X	X	STK4+DHSUR2+control LNA_2	0.161761	0.164438	0.167653		X	X	X	A
B	MGA+DHSUR2+miR-142-3p LNA_2	0.146816	0.146776	0.146972		X	X	X	STK4+DHSUR2+miR142-3p LNA_2	0.186905	0.188243	0.1881		X	X	X	B
C	MGA+DHSUR2+miR-16 LNA_2	0.170349	0.169918	0.171334		X	X	X	STK4+DHSUR2+miR16 LNA_2	0.195017	0.195301	0.194902		X	X	X	C
D	MGA+HSUR2+control LNA_2	0.0989796	0.0960912	0.0979284		X	X	X	STK4+HSUR2+control LNA_2	0.120807	0.123013	0.124863		X	X	X	D
E	MGA+HSUR2+miR-142-3p LNA_2	0.134445	0.132624	0.135247		X	X	X	STK4+HSUR2+miR142-3p LNA_2	0.164786	0.162978	0.164646		X	X	X	E
F	MGA+HSUR2+miR-16 LNA_2	0.134205	0.133083	0.134452		X	X	X	STK4+HSUR2+miR16 LNA_2	0.158213	0.159071	0.160356		X	X	X	F
G	X	X	X	X		X	X	X		X	X	X		X	X	X	G
H	X	X	X	X		X	X	X		X	X	X		X	X	X	H
	Relative LUC Activity
A	MGA+DHSUR2+control LNA_2	1.00229	0.994527	1.00318		X	X	X	STK4+DHSUR2+control LNA_2	0.982647	0.998912	1.01844		X	X	X	A
B	MGA+DHSUR2+miR-142-3p LNA_2	0.994284	0.994008	0.995336		X	X	X	STK4+DHSUR2+miR142-3p LNA_2	1.13539	1.14352	1.14265		X	X	X	B
C	MGA+DHSUR2+miR-16 LNA_2	1.15365	1.15074	1.16032		X	X	X	STK4+DHSUR2+miR16 LNA_2	1.18467	1.1864	1.18397		X	X	X	C
D	MGA+HSUR2+control LNA_2	0.670319	0.650758	0.6632		X	X	X	STK4+HSUR2+control LNA_2	0.733863	0.747269	0.758507		X	X	X	D
E	MGA+HSUR2+miR-142-3p LNA_2	0.910503	0.898166	0.915933		X	X	X	STK4+HSUR2+miR142-3p LNA_2	1.00102	0.990041	1.00017		X	X	X	E
F	MGA+HSUR2+miR-16 LNA_2	0.908873	0.901277	0.910552		X	X	X	STK4+HSUR2+miR16 LNA_2	0.961096	0.966306	0.974116		X	X	X	F
G	X	X	X	X		X	X	X		X	X	X		X	X	X	G
H	X	X	X	X		X	X	X		X	X	X		X	X	X	H
	Mean
A	MGA+DHSUR2+control LNA_2	1				X	X	X	STK4+DHSUR2+control LNA_2	1				X	X	X	A
B	MGA+DHSUR2+miR-142-3p LNA_2	0.994543				X	X	X	STK4+DHSUR2+miR142-3p LNA_2	1.14052				X	X	X	B
C	MGA+DHSUR2+miR-16 LNA_2	1.1549				X	X	X	STK4+DHSUR2+miR16 LNA_2	1.18501				X	X	X	C
D	MGA+HSUR2+control LNA_2	0.661425				X	X	X	STK4+HSUR2+control LNA_2	0.746546				X	X	X	D
E	MGA+HSUR2+miR-142-3p LNA_2	0.908201				X	X	X	STK4+HSUR2+miR142-3p LNA_2	0.997079				X	X	X	E
F	MGA+HSUR2+miR-16 LNA_2	0.9069				X	X	X	STK4+HSUR2+miR16 LNA_2	0.967173				X	X	X	F
G	X	X	X	X		X	X	X		X	X	X		X	X	X	G
H	X	X	X	X		X	X	X		X	X	X		X	X	X	H
	Experiment_3
	Firefly LUC	1	2	3		4	5	6		7	8	9		10	11	12
A		X	X	X	X	X	X	X	MGA+DHSUR2+control LNA_3	202988	212655	216187	STK4+DHSUR2+control LNA_3	154135	169296	173402	A
B		X	X	X	X	X	X	X	MGA+DHSUR2+miR-142-3p LNA_3	128480	134356	137400	STK4+DHSUR2+miR142-3p LNA_3	132372	136421	141174	B
C		X	X	X	X	X	X	X	MGA+DHSUR2+miR-16 LNA_3	97617	98115	105923	STK4+DHSUR2+miR16 LNA_3	134753	143579	146547	C
D		X	X	X	X	X	X	X	MGA+HSUR2+control LNA_3	256033	285140	282773	STK4+HSUR2+control LNA_3	233841	257599	273070	D
E		X	X	X	X	X	X	X	MGA+HSUR2+miR-142-3p LNA_3	199363	213870	212207	STK4+HSUR2+miR142-3p LNA_3	322116	342391	352435	E
F		X	X	X	X	X	X	X	MGA+HSUR2+miR-16 LNA_3	253268	271160	271827	STK4+HSUR2+miR16 LNA_3	248854	263862	272643	F
G		X	X	X	X	X	X	X			X	X	X	X	X	X	G
H		X	X	X	X	X	X	X			X	X	X	X	X	X	H
	Renilla LUC
A		X	X	X	X	X	X	X	MGA+DHSUR2+control LNA_3	1294514	1439299	1383196	STK4+DHSUR2+control LNA_3	867430	964523	965689	A
B		X	X	X	X	X	X	X	MGA+DHSUR2+miR-142-3p LNA_3	706832	739743	738350	STK4+DHSUR2+miR142-3p LNA_3	705529	721467	742725	B
C		X	X	X	X	X	X	X	MGA+DHSUR2+miR-16 LNA_3	402003	420726	429966	STK4+DHSUR2+miR16 LNA_3	656058	711251	741321	C
D		X	X	X	X	X	X	X	MGA+HSUR2+control LNA_3	2127990	2594516	2488826	STK4+HSUR2+control LNA_3	2012098	2219229	2373094	D
E		X	X	X	X	X	X	X	MGA+HSUR2+miR-142-3p LNA_3	1346069	1546939	1430836	STK4+HSUR2+miR142-3p LNA_3	2009262	2093175	2227144	E
F		X	X	X	X	X	X	X	MGA+HSUR2+miR-16 LNA_3	1827495	1921067	2041832	STK4+HSUR2+miR16 LNA_3	1626534	1860006	1901222	F
G		X	X	X	X	X	X	X			X	X	X	X	X	X	G
H		X	X	X	X	X	X	X			X	X	X	X	X	X	H
	Ratio
A		X	X	X	X	X	X	X	MGA+DHSUR2+control LNA_3	0.156806	0.147749	0.156295	STK4+DHSUR2+control LNA_3	0.177692	0.175523	0.179563	A
B		X	X	X	X	X	X	X	MGA+DHSUR2+miR-142-3p LNA_3	0.181769	0.181625	0.186091	STK4+DHSUR2+miR142-3p LNA_3	0.187621	0.189088	0.190076	B
C		X	X	X	X	X	X	X	MGA+DHSUR2+miR-16 LNA_3	0.242827	0.233204	0.246352	STK4+DHSUR2+miR16 LNA_3	0.205398	0.201868	0.197684	C
D		X	X	X	X	X	X	X	MGA+HSUR2+control LNA_3	0.120317	0.109901	0.113617	STK4+HSUR2+control LNA_3	0.116218	0.116076	0.115069	D
E		X	X	X	X	X	X	X	MGA+HSUR2+miR-142-3p LNA_3	0.148108	0.138254	0.14831	STK4+HSUR2+miR142-3p LNA_3	0.160316	0.163575	0.158245	E
F		X	X	X	X	X	X	X	MGA+HSUR2+miR-16 LNA_3	0.138588	0.141151	0.133129	STK4+HSUR2+miR16 LNA_3	0.152996	0.141861	0.143404	F
G		X	X	X	X	X	X	X			X	X	X	X	X	X	G
H		X	X	X	X	X	X	X			X	X	X	X	X	X	H
	Relative LUC Activity
A		X	X	X	X	X	X	X	MGA+DHSUR2+control LNA_3	1.02076	0.961802	1.01744	STK4+DHSUR2+control LNA_3	1.00056	0.988347	1.0111	A
B		X	X	X	X	X	X	X	MGA+DHSUR2+miR-142-3p LNA_3	1.18326	1.18233	1.21139	STK4+DHSUR2+miR142-3p LNA_3	1.05647	1.06473	1.07029	B
C		X	X	X	X	X	X	X	MGA+DHSUR2+miR-16 LNA_3	1.58073	1.51809	1.60368	STK4+DHSUR2+miR16 LNA_3	1.15657	1.13669	1.11313	C
D		X	X	X	X	X	X	X	MGA+HSUR2+control LNA_3	0.783227	0.715423	0.739613	STK4+HSUR2+control LNA_3	0.654405	0.653608	0.647939	D
E		X	X	X	X	X	X	X	MGA+HSUR2+miR-142-3p LNA_3	0.964136	0.89999	0.965453	STK4+HSUR2+miR142-3p LNA_3	0.902716	0.921069	0.891058	E
F		X	X	X	X	X	X	X	MGA+HSUR2+miR-16 LNA_3	0.902163	0.918849	0.86663	STK4+HSUR2+miR16 LNA_3	0.861503	0.7988	0.807489	F
G		X	X	X	X	X	X	X			X	X	X	X	X	X	G
H		X	X	X	X	X	X	X			X	X	X	X	X	X	H
	Mean
A		X	X	X	X	X	X	X	MGA+DHSUR2+control LNA_3	1			STK4+DHSUR2+control LNA_3	1			A
B		X	X	X	X	X	X	X	MGA+DHSUR2+miR-142-3p LNA_3	1.19233			STK4+DHSUR2+miR142-3p LNA_3	1.06383			B
C		X	X	X	X	X	X	X	MGA+DHSUR2+miR-16 LNA_3	1.5675			STK4+DHSUR2+miR16 LNA_3	1.13546			C
D		X	X	X	X	X	X	X	MGA+HSUR2+control LNA_3	0.746087			STK4+HSUR2+control LNA_3	0.651984			D
E		X	X	X	X	X	X	X	MGA+HSUR2+miR-142-3p LNA_3	0.943193			STK4+HSUR2+miR142-3p LNA_3	0.904948			E
F		X	X	X	X	X	X	X	MGA+HSUR2+miR-16 LNA_3	0.895881			STK4+HSUR2+miR16 LNA_3	0.822597			F
G		X	X	X	X	X	X	X			X	X	X	X	X	X	G
H		X	X	X	X	X	X	X			X	X	X	X	X	X	H
	Experiment_4
	Firefly LUC	1	2	3		4	5	6	7	8	9	10	11	12
A	YTHDC1+DHSUR2+control LNA_1	35552	38018	37528	CD69+DHSUR2+control LNA_1	11370	12017	11756	X	X	X	X	X	X	A
B	YTHDC1+DHSUR2+miR-142-3p LNA_1	91907	101543	99585	CD69+DHSUR2+miR-142-3p LNA_1	17879	19229	18868	X	X	X	X	X	X	B
C	YTHDC1+DHSUR2+miR-16 LNA_1	122818	118287	119676	CD69+DHSUR2+miR-16 LNA_1	9449	9797	9574	X	X	X	X	X	X	C
D	YTHDC1+HSUR2+control LNA_1	54846	58124	57654	CD69+HSUR2+control LNA_1	16119	18216	18642	X	X	X	X	X	X	D
E	YTHDC1+HSUR2+miR-142-3p LNA_1	97139	102367	99107	CD69+HSUR2+miR-142-3p LNA_1	8310	8829	8584	X	X	X	X	X	X	E
F	YTHDC1+HSUR2+miR-16 LNA_1	81126	85628	82627	CD69+HSUR2+miR-16 LNA_1	9714	10729	10296	X	X	X	X	X	X	F
G	X	X	X	X		X	X	X	X	X	X	X	X	X	G
H	X	X	X	X		X	X	X	X	X	X	X	X	X	H
	Renilla LUC
A	YTHDC1+DHSUR2+control LNA_1	574012	602020	589559	CD69+DHSUR2+control LNA_1	791559	813775	722638	X	X	X	X	X	X	A
B	YTHDC1+DHSUR2+miR-142-3p LNA_1	1400823	1558546	1501933	CD69+DHSUR2+miR-142-3p LNA_1	1275026	1364086	1311652	X	X	X	X	X	X	B
C	YTHDC1+DHSUR2+miR-16 LNA_1	1862122	1777022	1765530	CD69+DHSUR2+miR-16 LNA_1	634157	647295	632623	X	X	X	X	X	X	C
D	YTHDC1+HSUR2+control LNA_1	1152595	1261387	1229882	CD69+HSUR2+control LNA_1	1520755	1595918	1657985	X	X	X	X	X	X	D
E	YTHDC1+HSUR2+miR-142-3p LNA_1	1492368	1595251	1528652	CD69+HSUR2+miR-142-3p LNA_1	619673	635200	611689	X	X	X	X	X	X	E
F	YTHDC1+HSUR2+miR-16 LNA_1	1673034	1747705	1697629	CD69+HSUR2+miR-16 LNA_1	763194	820067	777528	X	X	X	X	X	X	F
G	X	X	X	X		X	X	X	X	X	X	X	X	X	G
H	X	X	X	X		X	X	X	X	X	X	X	X	X	H
	Ratio
A	YTHDC1+DHSUR2+control LNA_1	0.061936	0.0631507	0.0636544	CD69+DHSUR2+control LNA_1	0.0143641	0.014767	0.0162682	X	X	X	X	X	X	A
B	YTHDC1+DHSUR2+miR-142-3p LNA_1	0.0656093	0.0651524	0.0663046	CD69+DHSUR2+miR-142-3p LNA_1	0.0140225	0.0140966	0.0143849	X	X	X	X	X	X	B
C	YTHDC1+DHSUR2+miR-16 LNA_1	0.0659559	0.0665647	0.0677847	CD69+DHSUR2+miR-16 LNA_1	0.0149001	0.0151353	0.0151338	X	X	X	X	X	X	C
D	YTHDC1+HSUR2+control LNA_1	0.0475848	0.0460794	0.0468777	CD69+HSUR2+control LNA_1	0.0105993	0.0114141	0.0112438	X	X	X	X	X	X	D
E	YTHDC1+HSUR2+miR-142-3p LNA_1	0.0650905	0.0641698	0.0648329	CD69+HSUR2+miR-142-3p LNA_1	0.0134103	0.0138996	0.0140333	X	X	X	X	X	X	E
F	YTHDC1+HSUR2+miR-16 LNA_1	0.0484903	0.0489945	0.048672	CD69+HSUR2+miR-16 LNA_1	0.0127281	0.0130831	0.013242	X	X	X	X	X	X	F
G	X	X	X	X		X	X	X	X	X	X	X	X	X	G
H	X	X	X	X		X	X	X	X	X	X	X	X	X	H
	Relative LUC Activity
A	YTHDC1+DHSUR2+control LNA_1	0.98446	1.00377	1.01177	CD69+DHSUR2+control LNA_1	0.949183	0.975809	1.07501	X	X	X	X	X	X	A
B	YTHDC1+DHSUR2+miR-142-3p LNA_1	1.04285	1.03558	1.0539	CD69+DHSUR2+miR-142-3p LNA_1	0.92661	0.931511	0.950561	X	X	X	X	X	X	B
C	YTHDC1+DHSUR2+miR-16 LNA_1	1.04836	1.05803	1.07742	CD69+DHSUR2+miR-16 LNA_1	0.984605	1.00015	1.00005	X	X	X	X	X	X	C
D	YTHDC1+HSUR2+control LNA_1	0.75635	0.732423	0.745111	CD69+HSUR2+control LNA_1	0.700409	0.75425	0.742993	X	X	X	X	X	X	D
E	YTHDC1+HSUR2+miR-142-3p LNA_1	1.0346	1.01997	1.03051	CD69+HSUR2+miR-142-3p LNA_1	0.886158	0.918489	0.927325	X	X	X	X	X	X	E
F	YTHDC1+HSUR2+miR-16 LNA_1	0.770744	0.778758	0.773631	CD69+HSUR2+miR-16 LNA_1	0.841078	0.864536	0.875035	X	X	X	X	X	X	F
G	X	X	X	X		X	X	X	X	X	X	X	X	X	G
H	X	X	X	X		X	X	X	X	X	X	X	X	X	H
	Mean
A	YTHDC1+DHSUR2+control LNA_1	1			CD69+DHSUR2+control LNA_1	1			X	X	X	X	X	X	A
B	YTHDC1+DHSUR2+miR-142-3p LNA_1	1.04411			CD69+DHSUR2+miR-142-3p LNA_1	0.936227			X	X	X	X	X	X	B
C	YTHDC1+DHSUR2+miR-16 LNA_1	1.06127			CD69+DHSUR2+miR-16 LNA_1	0.994934			X	X	X	X	X	X	C
D	YTHDC1+HSUR2+control LNA_1	0.744628			CD69+HSUR2+control LNA_1	0.732551			X	X	X	X	X	X	D
E	YTHDC1+HSUR2+miR-142-3p LNA_1	1.02836			CD69+HSUR2+miR-142-3p LNA_1	0.910657			X	X	X	X	X	X	E
F	YTHDC1+HSUR2+miR-16 LNA_1	0.774378			CD69+HSUR2+miR-16 LNA_1	0.860216			X	X	X	X	X	X	F
G	X	X	X	X		X	X	X	X	X	X	X	X	X	G
H	X	X	X	X		X	X	X	X	X	X	X	X	X	H
	Experiment_5
	Firefly LUC	1	2	3		4	5	6		7	8	9		10	11	12
A	CD69+DHSUR2+control LNA_2	7504	8118	8156	CD69+DHSUR2+control LNA_3	6494	7129	7197	YTHDC1+DHSUR2+control LNA_2	42492	43654	42714	YTHDC1+DHSUR2+control LNA_3	39945	42206	42066	A
B	CD69+DHSUR2+miR-142-3p LNA_2	7310	7877	7864	CD69+DHSUR2+miR-142-3p LNA_3	7216	7868	7718	YTHDC1+DHSUR2+miR-142-3p LNA_2	37837	40444	38914	YTHDC1+DHSUR2+miR-142-3p LNA_3	36012	38359	36910	B
C	CD69+DHSUR2+miR-16 LNA_2	6154	6917	6735	CD69+DHSUR2+miR-16 LNA_3	7303	7897	7866	YTHDC1+DHSUR2+miR-16 LNA_2	34204	34896	34209	YTHDC1+DHSUR2+miR-16 LNA_3	34507	37488	37395	C
D	CD69+HSUR2+control LNA_2	10198	9858	10527	CD69+HSUR2+control LNA_3	7990	8662	8686	YTHDC1+HSUR2+control LNA_2	71939	77526	75379	YTHDC1+HSUR2+control LNA_3	55962	59103	58244	D
E	CD69+HSUR2+miR-142-3p LNA_2	8101	8560	8707	CD69+HSUR2+miR-142-3p LNA_3	8204	8999	9010	YTHDC1+HSUR2+miR-142-3p LNA_2	58194	63343	62254	YTHDC1+HSUR2+miR-142-3p LNA_3	44729	46447	46271	E
F	CD69+HSUR2+miR-16 LNA_2	6822	7299	7080	CD69+HSUR2+miR-16 LNA_3	6019	6585	6612	YTHDC1+HSUR2+miR-16 LNA_2	45969	49846	48723	YTHDC1+HSUR2+miR-16 LNA_3	36147	38791	39466	F
G	X	X	X	X		X	X	X		X	X	X		X	X	X	G
H	X	X	X	X		X	X	X		X	X	X		X	X	X	H
	Renilla LUC
A	CD69+DHSUR2+control LNA_2	185172	205113	201291	CD69+DHSUR2+control LNA_3	155484	168925	169081	YTHDC1+DHSUR2+control LNA_2	227922	236857	231233	YTHDC1+DHSUR2+control LNA_3	223427	238024	239822	A
B	CD69+DHSUR2+miR-142-3p LNA_2	176286	188129	189623	CD69+DHSUR2+miR-142-3p LNA_3	172478	186269	183704	YTHDC1+DHSUR2+miR-142-3p LNA_2	224331	242725	234758	YTHDC1+DHSUR2+miR-142-3p LNA_3	209138	225136	215281	B
C	CD69+DHSUR2+miR-16 LNA_2	142425	158684	153503	CD69+DHSUR2+miR-16 LNA_3	164172	177900	176980	YTHDC1+DHSUR2+miR-16 LNA_2	196929	201343	197576	YTHDC1+DHSUR2+miR-16 LNA_3	192284	208785	208575	C
D	CD69+HSUR2+control LNA_2	402546	399514	413542	CD69+HSUR2+control LNA_3	283246	313837	305693	YTHDC1+HSUR2+control LNA_2	662754	709143	680019	YTHDC1+HSUR2+control LNA_3	438003	467186	457959	D
E	CD69+HSUR2+miR-142-3p LNA_2	229125	246058	250459	CD69+HSUR2+miR-142-3p LNA_3	205444	227849	226209	YTHDC1+HSUR2+miR-142-3p LNA_2	317613	332015	321145	YTHDC1+HSUR2+miR-142-3p LNA_3	248798	270052	267668	E
F	CD69+HSUR2+miR-16 LNA_2	166032	180099	176840	CD69+HSUR2+miR-16 LNA_3	150443	164031	164046	YTHDC1+HSUR2+miR-16 LNA_2	450696	505467	489330	YTHDC1+HSUR2+miR-16 LNA_3	304680	314131	306157	F
G	X	X	X	X		X	X	X		X	X	X		X	X	X	G
H	X	X	X	X		X	X	X		X	X	X		X	X	X	H
	Ratio
A	CD69+DHSUR2+control LNA_2	0.0405245	0.0395782	0.0405185	CD69+DHSUR2+control LNA_3	0.0417664	0.0422022	0.0425654	YTHDC1+DHSUR2+control LNA_2	0.186432	0.184305	0.184723	YTHDC1+DHSUR2+control LNA_3	0.178783	0.177318	0.175405	A
B	CD69+DHSUR2+miR-142-3p LNA_2	0.0414667	0.0418702	0.0414718	CD69+DHSUR2+miR-142-3p LNA_3	0.0418372	0.04224	0.0420132	YTHDC1+DHSUR2+miR-142-3p LNA_2	0.168666	0.166625	0.165762	YTHDC1+DHSUR2+miR-142-3p LNA_3	0.172193	0.170381	0.17145	B
C	CD69+DHSUR2+miR-16 LNA_2	0.0432087	0.0435898	0.0438754	CD69+DHSUR2+miR-16 LNA_3	0.0444838	0.0443901	0.0444457	YTHDC1+DHSUR2+miR-16 LNA_2	0.173687	0.173316	0.173143	YTHDC1+DHSUR2+miR-16 LNA_3	0.179459	0.179553	0.179288	C
D	CD69+HSUR2+control LNA_2	0.0253338	0.024675	0.0254557	CD69+HSUR2+control LNA_3	0.0282087	0.0276003	0.0284141	YTHDC1+HSUR2+control LNA_2	0.108546	0.109324	0.110848	YTHDC1+HSUR2+control LNA_3	0.127766	0.126508	0.127182	D
E	CD69+HSUR2+miR-142-3p LNA_2	0.0353562	0.0347885	0.0347642	CD69+HSUR2+miR-142-3p LNA_3	0.039933	0.0394955	0.0398304	YTHDC1+HSUR2+miR-142-3p LNA_2	0.183223	0.190784	0.19385	YTHDC1+HSUR2+miR-142-3p LNA_3	0.17978	0.171993	0.172867	E
F	CD69+HSUR2+miR-16 LNA_2	0.0410885	0.0405277	0.0400362	CD69+HSUR2+miR-16 LNA_3	0.0400085	0.0401449	0.0403058	YTHDC1+HSUR2+miR-16 LNA_2	0.101996	0.0986138	0.0995708	YTHDC1+HSUR2+miR-16 LNA_3	0.118639	0.123487	0.128908	F
G	X	X	X	X		X	X	X		X	X	X		X	X	X	G
H	X	X	X	X		X	X	X		X	X	X		X	X	X	H
	Relative LUC Activity
A	CD69+DHSUR2+control LNA_2	1.0079	0.98436	1.00775	CD69+DHSUR2+control LNA_3	0.990241	1.00057	1.00919	YTHDC1+DHSUR2+control LNA_2	1.00691	0.995419	0.997674	YTHDC1+DHSUR2+control LNA_3	1.00911	1.00084	0.990045	A
B	CD69+DHSUR2+miR-142-3p LNA_2	1.03133	1.04137	1.03146	CD69+DHSUR2+miR-142-3p LNA_3	0.991921	1.00147	0.996094	YTHDC1+DHSUR2+miR-142-3p LNA_2	0.910952	0.899928	0.895269	YTHDC1+DHSUR2+miR-142-3p LNA_3	0.971912	0.96169	0.967723	B
C	CD69+DHSUR2+miR-16 LNA_2	1.07466	1.08413	1.09124	CD69+DHSUR2+miR-16 LNA_3	1.05467	1.05245	1.05377	YTHDC1+DHSUR2+miR-16 LNA_2	0.93807	0.936068	0.935135	YTHDC1+DHSUR2+miR-16 LNA_3	1.01292	1.01346	1.01196	C
D	CD69+HSUR2+control LNA_2	0.630082	0.613698	0.633115	CD69+HSUR2+control LNA_3	0.668802	0.654377	0.673672	YTHDC1+HSUR2+control LNA_2	0.586247	0.590448	0.598684	YTHDC1+HSUR2+control LNA_3	0.721155	0.714056	0.717856	D
E	CD69+HSUR2+miR-142-3p LNA_2	0.879355	0.865235	0.864629	CD69+HSUR2+miR-142-3p LNA_3	0.946774	0.9364	0.944342	YTHDC1+HSUR2+miR-142-3p LNA_2	0.989574	1.03041	1.04697	YTHDC1+HSUR2+miR-142-3p LNA_3	1.01474	0.970785	0.97572	E
F	CD69+HSUR2+miR-16 LNA_2	1.02192	1.00798	0.995751	CD69+HSUR2+miR-16 LNA_3	0.948564	0.951797	0.955612	YTHDC1+HSUR2+miR-16 LNA_2	0.550871	0.532606	0.537775	YTHDC1+HSUR2+miR-16 LNA_3	0.669639	0.697	0.727598	F
G	X	X	X	X		X	X	X		X	X	X		X	X	X	G
H	X	X	X	X		X	X	X		X	X	X		X	X	X	H
	Mean
A	CD69+DHSUR2+control LNA_2	1			CD69+DHSUR2+control LNA_3	1			YTHDC1+DHSUR2+control LNA_2	1			YTHDC1+DHSUR2+control LNA_3	1			A
B	CD69+DHSUR2+miR-142-3p LNA_2	1.03472			CD69+DHSUR2+miR-142-3p LNA_3	0.996495			YTHDC1+DHSUR2+miR-142-3p LNA_2	0.90205			YTHDC1+DHSUR2+miR-142-3p LNA_3	0.967108			B
C	CD69+DHSUR2+miR-16 LNA_2	1.08334			CD69+DHSUR2+miR-16 LNA_3	1.05363			YTHDC1+DHSUR2+miR-16 LNA_2	0.936425			YTHDC1+DHSUR2+miR-16 LNA_3	1.01278			C
D	CD69+HSUR2+control LNA_2	0.625632			CD69+HSUR2+control LNA_3	0.665617			YTHDC1+HSUR2+control LNA_2	0.591793			YTHDC1+HSUR2+control LNA_3	0.717689			D
E	CD69+HSUR2+miR-142-3p LNA_2	0.86974			CD69+HSUR2+miR-142-3p LNA_3	0.942505			YTHDC1+HSUR2+miR-142-3p LNA_2	1.02232			YTHDC1+HSUR2+miR-142-3p LNA_3	0.987082			E
F	CD69+HSUR2+miR-16 LNA_2	1.00855			CD69+HSUR2+miR-16 LNA_3	0.951991			YTHDC1+HSUR2+miR-16 LNA_2	0.540417			YTHDC1+HSUR2+miR-16 LNA_3	0.698079			F
G	X	X	X	X		X	X	X		X	X	X		X	X	X	G
H	X	X	X	X		X	X	X		X	X	X		X	X	X	H
