# Supplementary material for: Viral miRNA adaptor differentially recruits miRNAs to target mRNAs through alternative base-pairing
Source: eLife. 2019 Sep 20;8:e50530. doi: 10.7554/eLife.50530 (PMC6763288; doi:10.7554/eLife.50530)
Supplement: Figure 6—source data 1. [file elife-50530-fig6-data1.xlsx]

## Sheet: Sheet1
	AltbsTP53RKmut & altbsPACS1mut_reporters _plus_LNA inhibitors
	Two million stable U937 luciferase reporter cells were nucleofected each with 3 µg of GFP-DHSUR2 or GFP-HSUR2 plus 50 pmoles of either control LNA or anti-miR-142-3p or anti-miR-16 using Amaxa's kit V and program T-020.
	Cells were grown in complete media (plus puromycin & blasticidin) overnight at 37°C/5% CO2 and sorted. Extracts from 30,000 cells were prepared with 50 µl of PBL and 10 µl samples were assayed with 50 µl each of firefly and
	renilla luciferase substrates.
	Experiment_1
	FireFly LUC Activity	1	2	3		4	5	6		7	8	9	10	11	12
A		X	X	X	PACS1+DHSUR2+control LNA_1	62775	67703	67771	X	X	X	X	X	X	X	A
B		X	X	X	PACS1+DHSUR2+miR-142-3p LNA_1	75865	82408	83091	X	X	X	X	X	X	X	B
C		X	X	X	PACS1+DHSUR2+miR-16 LNA_1	61051	63374	66709	X	X	X	X	X	X	X	C
D		X	X	X	PACS1+HSUR2+control LNA_1	53536	59165	59282	X	X	X	X	X	X	X	D
E		X	X	X	PACS1+HSUR2+miR-142-3p LNA_1	70895	75950	77369	X	X	X	X	X	X	X	E
F		X	X	X	PACS1+HSUR2+miR-16 LNA_1	64637	70360	69921	X	X	X	X	X	X	X	F
G		X	X	X		X	X	X		X	X	X	X	X	X	G
H		X	X	X		X	X	X		X	X	X	X	X	X	H
	Renilla LUC Activity
A		X	X	X	PACS1+DHSUR2+control LNA_1	920432	1002990	1008253	X	X	X	X	X	X	X	A
B		X	X	X	PACS1+DHSUR2+miR-142-3p LNA_1	1235882	1342475	1349433	X	X	X	X	X	X	X	B
C		X	X	X	PACS1+DHSUR2+miR-16 LNA_1	824957	867602	920348	X	X	X	X	X	X	X	C
D		X	X	X	PACS1+HSUR2+control LNA_1	1291189	1477937	1465872	X	X	X	X	X	X	X	D
E		X	X	X	PACS1+HSUR2+miR-142-3p LNA_1	1454375	1559121	1535855	X	X	X	X	X	X	X	E
F		X	X	X	PACS1+HSUR2+miR-16 LNA_1	1074016	1172666	1148931	X	X	X	X	X	X	X	F
G	X	X	X	X		X	X	X		X	X	X	X	X	X	G
H	X	X	X	X		X	X	X		X	X	X	X	X	X	H
	LUC ratios
A		X	X	X	PACS1+DHSUR2+control LNA_1	0.0682017	0.0675012	0.0672163	X	X	X	X	X	X	X	A
B		X	X	X	PACS1+DHSUR2+miR-142-3p LNA_1	0.0613853	0.0613851	0.0615748	X	X	X	X	X	X	X	B
C		X	X	X	PACS1+DHSUR2+miR-16 LNA_1	0.0740051	0.073045	0.0724824	X	X	X	X	X	X	X	C
D		X	X	X	PACS1+HSUR2+control LNA_1	0.0414626	0.0400322	0.0404415	X	X	X	X	X	X	X	D
E		X	X	X	PACS1+HSUR2+miR-142-3p LNA_1	0.048746	0.0487133	0.0503752	X	X	X	X	X	X	X	E
F		X	X	X	PACS1+HSUR2+miR-16 LNA_1	0.0601825	0.06	0.0608574	X	X	X	X	X	X	X	F
G	X	X	X	X		X	X	X		X	X	X	X	X	X	G
H	X	X	X	X		X	X	X		X	X	X	X	X	X	H
	Relative LUC Activity
A		X	X	X	PACS1+DHSUR2+control LNA_1	1.00831	0.997952	0.99374	X	X	X	X	X	X	X	A
B		X	X	X	PACS1+DHSUR2+miR-142-3p LNA_1	0.907534	0.907531	0.910334	X	X	X	X	X	X	X	B
C		X	X	X	PACS1+DHSUR2+miR-16 LNA_1	1.09411	1.07991	1.07159	X	X	X	X	X	X	X	C
D		X	X	X	PACS1+HSUR2+control LNA_1	0.612991	0.591844	0.597895	X	X	X	X	X	X	X	D
E		X	X	X	PACS1+HSUR2+miR-142-3p LNA_1	0.720672	0.720189	0.744758	X	X	X	X	X	X	X	E
F		X	X	X	PACS1+HSUR2+miR-16 LNA_1	0.889752	0.887053	0.89973	X	X	X	X	X	X	X	F
G	X	X	X	X		X	X	X		X	X	X	X	X	X	G
H	X	X	X	X		X	X	X		X	X	X	X	X	X	H
	Mean
A		X	X	X	PACS1+DHSUR2+control LNA_1	1			X	X	X	X	X	X	X	A
B		X	X	X	PACS1+DHSUR2+miR-142-3p LNA_1	0.908466			X	X	X	X	X	X	X	B
C		X	X	X	PACS1+DHSUR2+miR-16 LNA_1	1.08187			X	X	X	X	X	X	X	C
D		X	X	X	PACS1+HSUR2+control LNA_1	0.60091			X	X	X	X	X	X	X	D
E		X	X	X	PACS1+HSUR2+miR-142-3p LNA_1	0.728539			X	X	X	X	X	X	X	E
F		X	X	X	PACS1+HSUR2+miR-16 LNA_1	0.892178			X	X	X	X	X	X	X	F
G	X	X	X	X		X	X	X		X	X	X	X	X	X	G
H	X	X	X	X		X	X	X		X	X	X	X	X	X	H
	Experiment_2
	Firefly LUC	1	2	3		4	5	6	7	8	9		10	11	12
A		X	X	X	PACS1+DHSUR2+control LNA_2	35929	36253	40472	X	X	X	TP53RK+DHSUR2+control LNA_1	74355	80307	79612	A
B		X	X	X	PACS1+DHSUR2+miR-142-3p LNA_2	40485	42928	43548	X	X	X	TP53RK+DHSUR2+miR142-3p LNA_1	105908	113349	113680	B
C		X	X	X	PACS1+DHSUR2+miR-16 LNA_2	24993	26839	27496	X	X	X	TP53RK+DHSUR2+miR16 LNA_1	71085	78202	78391	C
D		X	X	X	PACS1+HSUR2+control LNA_2	50199	56260	55826	X	X	X	TP53RK+HSUR2+control LNA_1	113404	124668	125858	D
E		X	X	X	PACS1+HSUR2+miR-142-3p LNA_2	55299	59015	57545	X	X	X	TP53RK+HSUR2+miR142-3p LNA_1	91050	95200	103075	E
F		X	X	X	PACS1+HSUR2+miR-16 LNA_2	36061	39101	39250	X	X	X	TP53RK+HSUR2+miR16 LNA_1	192524	204771	203409	F
G	X	X	X	X		X	X	X	X	X	X		X	X	X	G
H	X	X	X	X		X	X	X	X	X	X		X	X	X	H
	Renilla LUC
A		X	X	X	PACS1+DHSUR2+control LNA_2	141732	141783	156846	X	X	X	TP53RK+DHSUR2+control LNA_1	159170	178223	175005	A
B		X	X	X	PACS1+DHSUR2+miR-142-3p LNA_2	163967	176516	178170	X	X	X	TP53RK+DHSUR2+miR142-3p LNA_1	237917	253880	247318	B
C		X	X	X	PACS1+DHSUR2+miR-16 LNA_2	90284	96280	99244	X	X	X	TP53RK+DHSUR2+miR16 LNA_1	154803	162902	157791	C
D		X	X	X	PACS1+HSUR2+control LNA_2	277139	305188	296079	X	X	X	TP53RK+HSUR2+control LNA_1	342681	362023	362516	D
E		X	X	X	PACS1+HSUR2+miR-142-3p LNA_2	224682	243642	234942	X	X	X	TP53RK+HSUR2+miR142-3p LNA_1	225329	231020	248210	E
F		X	X	X	PACS1+HSUR2+miR-16 LNA_2	172805	179536	175372	X	X	X	TP53RK+HSUR2+miR16 LNA_1	556486	589740	582794	F
G	X	X	X	X		X	X	X	X	X	X		X	X	X	G
H	X	X	X	X		X	X	X	X	X	X		X	X	X	H
	Ratio
A		X	X	X	PACS1+DHSUR2+control LNA_2	0.2535	0.255694	0.258037	X	X	X	TP53RK+DHSUR2+control LNA_1	0.467142	0.450598	0.454913	A
B		X	X	X	PACS1+DHSUR2+miR-142-3p LNA_2	0.246909	0.243196	0.244418	X	X	X	TP53RK+DHSUR2+miR142-3p LNA_1	0.445147	0.446467	0.459651	B
C		X	X	X	PACS1+DHSUR2+miR-16 LNA_2	0.276826	0.27876	0.277055	X	X	X	TP53RK+DHSUR2+miR16 LNA_1	0.459197	0.480055	0.496803	C
D		X	X	X	PACS1+HSUR2+control LNA_2	0.181133	0.184345	0.188551	X	X	X	TP53RK+HSUR2+control LNA_1	0.330932	0.344365	0.347179	D
E		X	X	X	PACS1+HSUR2+miR-142-3p LNA_2	0.246121	0.24222	0.244933	X	X	X	TP53RK+HSUR2+miR142-3p LNA_1	0.404076	0.412086	0.415273	E
F		X	X	X	PACS1+HSUR2+miR-16 LNA_2	0.20868	0.217789	0.22381	X	X	X	TP53RK+HSUR2+miR16 LNA_1	0.345964	0.347223	0.349024	F
G	X	X	X	X		X	X	X	X	X	X		X	X	X	G
H	X	X	X	X		X	X	X	X	X	X		X	X	X	H
	Relative LUC Activity
A		X	X	X	PACS1+DHSUR2+control LNA_2	0.991227	0.999806	1.00897	X	X	X	TP53RK+DHSUR2+control LNA_1	1.02096	0.984805	0.994234	A
B		X	X	X	PACS1+DHSUR2+miR-142-3p LNA_2	0.965458	0.950939	0.955717	X	X	X	TP53RK+DHSUR2+miR142-3p LNA_1	0.97289	0.975775	1.00459	B
C		X	X	X	PACS1+DHSUR2+miR-16 LNA_2	1.08244	1.09	1.08333	X	X	X	TP53RK+DHSUR2+miR16 LNA_1	1.0036	1.04918	1.08579	C
D		X	X	X	PACS1+HSUR2+control LNA_2	0.708261	0.720822	0.737267	X	X	X	TP53RK+HSUR2+control LNA_1	0.723267	0.752626	0.758777	D
E		X	X	X	PACS1+HSUR2+miR-142-3p LNA_2	0.962376	0.947122	0.957729	X	X	X	TP53RK+HSUR2+miR142-3p LNA_1	0.883127	0.900633	0.9076	E
F		X	X	X	PACS1+HSUR2+miR-16 LNA_2	0.815976	0.851593	0.875135	X	X	X	TP53RK+HSUR2+miR16 LNA_1	0.756121	0.758872	0.762809	F
G	X	X	X	X		X	X	X	X	X	X		X	X	X	G
H	X	X	X	X		X	X	X	X	X	X		X	X	X	H
	Mean
A		X			PACS1+DHSUR2+control LNA_2	1			X			TP53RK+DHSUR2+control LNA_1	1			A
B		X			PACS1+DHSUR2+miR-142-3p LNA_2	0.957371			X			TP53RK+DHSUR2+miR142-3p LNA_1	0.984418			B
C		X			PACS1+DHSUR2+miR-16 LNA_2	1.08526			X			TP53RK+DHSUR2+miR16 LNA_1	1.04619			C
D		X			PACS1+HSUR2+control LNA_2	0.722117			X			TP53RK+HSUR2+control LNA_1	0.74489			D
E		X			PACS1+HSUR2+miR-142-3p LNA_2	0.955743			X			TP53RK+HSUR2+miR142-3p LNA_1	0.89712			E
F		X			PACS1+HSUR2+miR-16 LNA_2	0.847568			X			TP53RK+HSUR2+miR16 LNA_1	0.759267			F
G	X	X	X	X		X	X	X	X	X	X		X	X	X	G
H	X	X	X	X		X	X	X	X	X	X		X	X	X	H
	Experiment_3
	Firefly LUC	1	2	3		4	5	6		7	8	9		10	11	12
A	PACS1+DHSUR2+control LNA_3	111981	117875	117789	TP53RK+DHSUR2+control LNA_3	237535	259386	264460		X	X	X	X	X	X	X	A
B	PACS1+DHSUR2+miR-142-3p LNA_3	94619	103946	105775	TP53RK+DHSUR2+miR142-3p LNA_3	392595	424701	427225		X	X	X	X	X	X	X	B
C	PACS1+DHSUR2+miR-16 LNA_3	88934	96480	96977	TP53RK+DHSUR2+miR16 LNA_3	251216	268654	267696		X	X	X	X	X	X	X	C
D	PACS1+HSUR2+control LNA_3	207272	212896	206986	TP53RK+HSUR2+control LNA_3	389369	420332	431493		X	X	X	X	X	X	X	D
E	PACS1+HSUR2+miR-142-3p LNA_3	152932	160560	163200	TP53RK+HSUR2+miR142-3p LNA_3	440387	469227	491331		X	X	X	X	X	X	X	E
F	PACS1+HSUR2+miR-16 LNA_3	191617	176827	199436	TP53RK+HSUR2+miR16 LNA_3	378017	410386	413152		X	X	X	X	X	X	X	F
G	TP53RK+DHSUR2+control LNA_2	203259	222628	222098	TP53RK+DHSUR2+miR16 LNA_2	169844	180689	182065	TP53RK+HSUR2+miR142-3p LNA_2	230546	247929	245804		X	X	X	G
H	TP53RK+DHSUR2+miR142-3p LNA_2	176225	180831	189585	TP53RK+HSUR2+control LNA_2	377809	410148	406437	TP53RK+HSUR2+miR16 LNA_2	293329	318415	317185		X	X	X	H
	Renilla LUC
A	PACS1+DHSUR2+control LNA_3	693774	712083	773132	TP53RK+DHSUR2+control LNA_3	597801	651073	662406		X	X	X	X	X	X	X	A
B	PACS1+DHSUR2+miR-142-3p LNA_3	520037	603485	586993	TP53RK+DHSUR2+miR142-3p LNA_3	1156103	1271283	1196362		X	X	X	X	X	X	X	B
C	PACS1+DHSUR2+miR-16 LNA_3	519116	554797	537811	TP53RK+DHSUR2+miR16 LNA_3	577421	617336	609722		X	X	X	X	X	X	X	C
D	PACS1+HSUR2+control LNA_3	2449338	2442297	2457765	TP53RK+HSUR2+control LNA_3	1240469	1356505	1396688		X	X	X	X	X	X	X	D
E	PACS1+HSUR2+miR-142-3p LNA_3	955047	1014949	1030941	TP53RK+HSUR2+miR142-3p LNA_3	1101519	1221327	1308700		X	X	X	X	X	X	X	E
F	PACS1+HSUR2+miR-16 LNA_3	1262400	1080946	1357056	TP53RK+HSUR2+miR16 LNA_3	1231215	1335540	1360064		X	X	X	X	X	X	X	F
G	TP53RK+DHSUR2+control LNA_2	428100	473592	473621	TP53RK+DHSUR2+miR16 LNA_2	356439	377624	376079	TP53RK+HSUR2+miR142-3p LNA_2	452224	496660	490188		X	X	X	G
H	TP53RK+DHSUR2+miR142-3p LNA_2	375071	395561	415253	TP53RK+HSUR2+control LNA_2	1187403	1280398	1268040	TP53RK+HSUR2+miR16 LNA_2	895573	996847	1006303		X	X	X	H
	Ratio
A	PACS1+DHSUR2+control LNA_3	0.161408	0.165535	0.152353	TP53RK+DHSUR2+control LNA_3	0.397348	0.398398	0.399242		X	X	X	X	X	X	X	A
B	PACS1+DHSUR2+miR-142-3p LNA_3	0.181947	0.172243	0.180198	TP53RK+DHSUR2+miR142-3p LNA_3	0.339585	0.334073	0.357103		X	X	X	X	X	X	X	B
C	PACS1+DHSUR2+miR-16 LNA_3	0.171318	0.173901	0.180318	TP53RK+DHSUR2+miR16 LNA_3	0.435066	0.435183	0.439046		X	X	X	X	X	X	X	C
D	PACS1+HSUR2+control LNA_3	0.0846237	0.0871704	0.0842172	TP53RK+HSUR2+control LNA_3	0.313889	0.309864	0.30894		X	X	X	X	X	X	X	D
E	PACS1+HSUR2+miR-142-3p LNA_3	0.16013	0.158195	0.158302	TP53RK+HSUR2+miR142-3p LNA_3	0.3998	0.384194	0.375434		X	X	X	X	X	X	X	E
F	PACS1+HSUR2+miR-16 LNA_3	0.151788	0.163585	0.146962	TP53RK+HSUR2+miR16 LNA_3	0.307028	0.307281	0.303774		X	X	X	X	X	X	X	F
G	TP53RK+DHSUR2+control LNA_2	0.474793	0.470084	0.468936	TP53RK+DHSUR2+miR16 LNA_2	0.476502	0.478489	0.484114	TP53RK+HSUR2+miR142-3p LNA_2	0.509805	0.499193	0.501448		X	X	X	G
H	TP53RK+DHSUR2+miR142-3p LNA_2	0.469844	0.457151	0.456553	TP53RK+HSUR2+control LNA_2	0.318181	0.320329	0.320524	TP53RK+HSUR2+miR16 LNA_2	0.327532	0.319422	0.315198		X	X	X	H
	Relative LUC Activity
A	PACS1+DHSUR2+control LNA_3	1.01028	1.03611	0.953603	TP53RK+DHSUR2+control LNA_3	0.997537	1.00017	1.00229		X	X	X	X	X	X	X	A
B	PACS1+DHSUR2+miR-142-3p LNA_3	1.13883	1.0781	1.12789	TP53RK+DHSUR2+miR142-3p LNA_3	0.852523	0.838685	0.896504		X	X	X	X	X	X	X	B
C	PACS1+DHSUR2+miR-16 LNA_3	1.07231	1.08848	1.12864	TP53RK+DHSUR2+miR16 LNA_3	1.09223	1.09252	1.10222		X	X	X	X	X	X	X	C
D	PACS1+HSUR2+control LNA_3	0.529674	0.545614	0.527129	TP53RK+HSUR2+control LNA_3	0.788013	0.777909	0.77559		X	X	X	X	X	X	X	D
E	PACS1+HSUR2+miR-142-3p LNA_3	1.00228	0.99017	0.990839	TP53RK+HSUR2+miR142-3p LNA_3	1.00369	0.964515	0.942523		X	X	X	X	X	X	X	E
F	PACS1+HSUR2+miR-16 LNA_3	0.950066	1.02391	0.919861	TP53RK+HSUR2+miR16 LNA_3	0.770789	0.771425	0.762621		X	X	X	X	X	X	X	F
G	TP53RK+DHSUR2+control LNA_2	1.00747	0.997481	0.995045	TP53RK+DHSUR2+miR16 LNA_2	1.0111	1.01532	1.02725	TP53RK+HSUR2+miR142-3p LNA_2	1.08177	1.05925	1.06403		X	X	X	G
H	TP53RK+DHSUR2+miR142-3p LNA_2	0.996973	0.970038	0.968769	TP53RK+HSUR2+control LNA_2	0.675155	0.679712	0.680126	TP53RK+HSUR2+miR16 LNA_2	0.694997	0.677788	0.668826		X	X	X	H
	Mean
A	PACS1+DHSUR2+control LNA_3	1			TP53RK+DHSUR2+control LNA_3	1				X	X	X	X	X	X	X	A
B	PACS1+DHSUR2+miR-142-3p LNA_3	1.11494			TP53RK+DHSUR2+miR142-3p LNA_3	0.862571				X	X	X	X	X	X	X	B
C	PACS1+DHSUR2+miR-16 LNA_3	1.09648			TP53RK+DHSUR2+miR16 LNA_3	1.09566				X	X	X	X	X	X	X	C
D	PACS1+HSUR2+control LNA_3	0.534139			TP53RK+HSUR2+control LNA_3	0.780504				X	X	X	X	X	X	X	D
E	PACS1+HSUR2+miR-142-3p LNA_3	0.99443			TP53RK+HSUR2+miR142-3p LNA_3	0.970243				X	X	X	X	X	X	X	E
F	PACS1+HSUR2+miR-16 LNA_3	0.964612			TP53RK+HSUR2+miR16 LNA_3	0.768278				X	X	X	X	X	X	X	F
G	TP53RK+DHSUR2+control LNA_2	1			TP53RK+DHSUR2+miR16 LNA_2	1.01789			TP53RK+HSUR2+miR142-3p LNA_2	1.06835				X	X	X	G
H	TP53RK+DHSUR2+miR142-3p LNA_2	0.978593			TP53RK+HSUR2+control LNA_2	0.678331			TP53RK+HSUR2+miR16 LNA_2	0.680537				X	X	X	H
	Experiment_4
	Firefly LUC	1	2	3		4	5	6		7	8	9		10	11	12
A	altbsTP53RKmut+DHSUR2+control LNA_1	261182	291569	285290	altbsTP53RKmut+DHSUR2+control LNA_2	283912	273620	296244	altbsPACS1mut+DHSUR2+control LNA_1	92945	91541	93445	altbsPACS1mut+DHSUR2+control LNA_2	97296	93443	98707	A
B	altbsTP53RKmut+DHSUR2+miR142-3p LNA_1	176110	189982	191464	altbsTP53RKmut+DHSUR2+miR142-3p LNA_2	157350	157398	151917	atlbsPACS1mut+DHSUR2+miR-142-3p LNA_1	137251	150026	147555	atlbsPACS1mut+DHSUR2+miR-142-3p LNA_2	149679	153920	158921	B
C	altbsTP53RKmut+DHSUR2+miR16 LNA_1	119261	133592	129526	altbsTP53RKmut+DHSUR2+miR16 LNA_2	146217	148853	146472	altbsPACS1mut+DHSUR2+miR-16 LNA_1	90793	90740	90613	altbsPACS1mut+DHSUR2+miR-16 LNA_2	112568	111391	111382	C
D	altbsTP53RKmut+HSUR2+control LNA_1	178918	178113	190307	altbsTP53RKmut+HSUR2+control LNA_2	226207	228724	225406	altbsPACS1mut+HSUR2+control LNA_1	394813	446854	419157	altbsPACS1mut+HSUR2+control LNA_2	235895	230490	217090	D
E	altbsTP53RKmut+HSUR2+miR142-3p LNA_1	167657	181389	179409	altbsTP53RKmut+HSUR2+miR142-3p LNA_2	317717	327074	328111	altbsPACS1mut+HSUR2+miR-142-3p LNA_1	157336	163977	167606	altbsPACS1mut+HSUR2+miR-142-3p LNA_2	238602	240944	242058	E
F	altbsTP53RKmut+HSUR2+miR16 LNA_1	180515	190367	204492	altbsTP53RKmut+HSUR2+miR16 LNA_2	192298	207498	206098	altbsPACS1mut+HSUR2+miR-16 LNA_1	145615	164241	164013	altbsPACS1mut+HSUR2+miR-16 LNA_2	149046	152727	154882	F
G	Renilla	X	X	X	X	X	X	X		X	X	X		X	X	X	G
H		X	X	X		X	X	X		X	X	X		X	X	X	H
	Renilla LUC
A	altbsTP53RKmut+DHSUR2+control LNA_1	1132300	1276686	1238406	altbsTP53RKmut+DHSUR2+control LNA_2	1178677	1120750	1226755	altbsPACS1mut+DHSUR2+control LNA_1	262039	255429	261966	altbsPACS1mut+DHSUR2+control LNA_2	268010	255180	267945	A
B	altbsTP53RKmut+DHSUR2+miR142-3p LNA_1	745347	804748	805239	altbsTP53RKmut+DHSUR2+miR142-3p LNA_2	606779	601882	579291	atlbsPACS1mut+DHSUR2+miR-142-3p LNA_1	353935	385682	379901	atlbsPACS1mut+DHSUR2+miR-142-3p LNA_2	447208	456866	471667	B
C	altbsTP53RKmut+DHSUR2+miR16 LNA_1	579258	538249	517490	altbsTP53RKmut+DHSUR2+miR16 LNA_2	556725	569776	556075	altbsPACS1mut+DHSUR2+miR-16 LNA_1	228024	227677	228310	altbsPACS1mut+DHSUR2+miR-16 LNA_2	280171	277347	275492	C
D	altbsTP53RKmut+HSUR2+control LNA_1	1113592	1106283	1155944	altbsTP53RKmut+HSUR2+control LNA_2	1419320	1395594	1361840	altbsPACS1mut+HSUR2+control LNA_1	2130552	2411677	2233159	altbsPACS1mut+HSUR2+control LNA_2	1104092	1002407	915746	D
E	altbsTP53RKmut+HSUR2+miR142-3p LNA_1	714073	784353	767754	altbsTP53RKmut+HSUR2+miR142-3p LNA_2	1334585	1372230	1358959	altbsPACS1mut+HSUR2+miR-142-3p LNA_1	443284	460727	462952	altbsPACS1mut+HSUR2+miR-142-3p LNA_2	697639	695053	669529	E
F	altbsTP53RKmut+HSUR2+miR16 LNA_1	809609	854633	909953	altbsTP53RKmut+HSUR2+miR16 LNA_2	816394	874456	865113	altbsPACS1mut+HSUR2+miR-16 LNA_1	620670	670775	667296	altbsPACS1mut+HSUR2+miR-16 LNA_2	637874	641481	626296	F
G	Renilla	X	X	X	X	X	X	X		X	X	X		X	X	X	G
H		X	X	X		X	X	X		X	X	X		X	X	X	H
	Ratio
A	altbsTP53RKmut+DHSUR2+control LNA_1	0.230665	0.22838	0.230369	altbsTP53RKmut+DHSUR2+control LNA_2	0.240873	0.24414	0.241486	altbsPACS1mut+DHSUR2+control LNA_1	0.354699	0.358381	0.356707	altbsPACS1mut+DHSUR2+control LNA_2	0.363031	0.366185	0.368385	A
B	altbsTP53RKmut+DHSUR2+miR142-3p LNA_1	0.236279	0.236076	0.237773	altbsTP53RKmut+DHSUR2+miR142-3p LNA_2	0.25932	0.26151	0.262246	atlbsPACS1mut+DHSUR2+miR-142-3p LNA_1	0.387786	0.388989	0.388404	atlbsPACS1mut+DHSUR2+miR-142-3p LNA_2	0.334697	0.336904	0.336935	B
C	altbsTP53RKmut+DHSUR2+miR16 LNA_1	0.205886	0.248197	0.250297	altbsTP53RKmut+DHSUR2+miR16 LNA_2	0.262638	0.261248	0.263403	altbsPACS1mut+DHSUR2+miR-16 LNA_1	0.398173	0.398547	0.396886	altbsPACS1mut+DHSUR2+miR-16 LNA_2	0.401783	0.40163	0.404302	C
D	altbsTP53RKmut+HSUR2+control LNA_1	0.160667	0.161001	0.164633	altbsTP53RKmut+HSUR2+control LNA_2	0.159377	0.16389	0.165516	altbsPACS1mut+HSUR2+control LNA_1	0.18531	0.185288	0.187697	altbsPACS1mut+HSUR2+control LNA_2	0.213655	0.229937	0.237064	D
E	altbsTP53RKmut+HSUR2+miR142-3p LNA_1	0.23479	0.231259	0.23368	altbsTP53RKmut+HSUR2+miR142-3p LNA_2	0.238064	0.238352	0.241443	altbsPACS1mut+HSUR2+miR-142-3p LNA_1	0.354933	0.355909	0.362038	altbsPACS1mut+HSUR2+miR-142-3p LNA_2	0.342014	0.346656	0.361535	E
F	altbsTP53RKmut+HSUR2+miR16 LNA_1	0.222966	0.222747	0.224728	altbsTP53RKmut+HSUR2+miR16 LNA_2	0.235546	0.237288	0.238232	altbsPACS1mut+HSUR2+miR-16 LNA_1	0.234609	0.244853	0.245787	altbsPACS1mut+HSUR2+miR-16 LNA_2	0.233661	0.238085	0.247298	F
G		X	X	X	X	X	X	X		X	X	X		X	X	X	G
H		X	X	X		X	X	X		X	X	X		X	X	X	H
	Relative LUC Activity
A	altbsTP53RKmut+DHSUR2+control LNA_1	1.00374	0.9938	1.00246	altbsTP53RKmut+DHSUR2+control LNA_2	0.994661	1.00815	0.99719	altbsPACS1mut+DHSUR2+control LNA_1	0.994681	1.00501	1.00031	altbsPACS1mut+DHSUR2+control LNA_2	0.992249	1.00087	1.00688	A
B	altbsTP53RKmut+DHSUR2+miR142-3p LNA_1	1.02818	1.02729	1.03467	altbsTP53RKmut+DHSUR2+miR142-3p LNA_2	1.07083	1.07988	1.08292	atlbsPACS1mut+DHSUR2+miR-142-3p LNA_1	1.08747	1.09084	1.0892	atlbsPACS1mut+DHSUR2+miR-142-3p LNA_2	0.914804	0.920837	0.920921	B
C	altbsTP53RKmut+DHSUR2+miR16 LNA_1	0.895917	1.08004	1.08917	altbsTP53RKmut+DHSUR2+miR16 LNA_2	1.08453	1.0788	1.0877	altbsPACS1mut+DHSUR2+miR-16 LNA_1	1.1166	1.11764	1.11299	altbsPACS1mut+DHSUR2+miR-16 LNA_2	1.09817	1.09775	1.10505	C
D	altbsTP53RKmut+HSUR2+control LNA_1	0.699149	0.700601	0.716407	altbsTP53RKmut+HSUR2+control LNA_2	0.65813	0.676766	0.683479	altbsPACS1mut+HSUR2+control LNA_1	0.519665	0.519602	0.526358	altbsPACS1mut+HSUR2+control LNA_2	0.583969	0.62847	0.64795	D
E	altbsTP53RKmut+HSUR2+miR142-3p LNA_1	1.02169	1.00633	1.01687	altbsTP53RKmut+HSUR2+miR142-3p LNA_2	0.98306	0.984249	0.997012	altbsPACS1mut+HSUR2+miR-142-3p LNA_1	0.995337	0.998075	1.01526	altbsPACS1mut+HSUR2+miR-142-3p LNA_2	0.934803	0.947491	0.988159	E
F	altbsTP53RKmut+HSUR2+miR16 LNA_1	0.970241	0.96929	0.97791	altbsTP53RKmut+HSUR2+miR16 LNA_2	0.97266	0.979855	0.983755	altbsPACS1mut+HSUR2+miR-16 LNA_1	0.657914	0.686639	0.689261	altbsPACS1mut+HSUR2+miR-16 LNA_2	0.638649	0.650742	0.675924	F
G		X	X	X	X	X	X	X		X	X	X		X	X	X	G
H		X	X	X		X	X	X		X	X	X		X	X	X	H
	Mean
A	altbsTP53RKmut+DHSUR2+control LNA_1	1			altbsTP53RKmut+DHSUR2+control LNA_2	1			altbsPACS1mut+DHSUR2+control LNA_1	1			altbsPACS1mut+DHSUR2+control LNA_2	1			A
B	altbsTP53RKmut+DHSUR2+miR142-3p LNA_1	1.03005			altbsTP53RKmut+DHSUR2+miR142-3p LNA_2	1.07788			atlbsPACS1mut+DHSUR2+miR-142-3p LNA_1	1.08917			atlbsPACS1mut+DHSUR2+miR-142-3p LNA_2	0.918854			B
C	altbsTP53RKmut+DHSUR2+miR16 LNA_1	1.02171			altbsTP53RKmut+DHSUR2+miR16 LNA_2	1.08368			altbsPACS1mut+DHSUR2+miR-16 LNA_1	1.11574			altbsPACS1mut+DHSUR2+miR-16 LNA_2	1.10032			C
D	altbsTP53RKmut+HSUR2+control LNA_1	0.705386			altbsTP53RKmut+HSUR2+control LNA_2	0.672792			altbsPACS1mut+HSUR2+control LNA_1	0.521875			altbsPACS1mut+HSUR2+control LNA_2	0.62013			D
E	altbsTP53RKmut+HSUR2+miR142-3p LNA_1	1.01496			altbsTP53RKmut+HSUR2+miR142-3p LNA_2	0.988107			altbsPACS1mut+HSUR2+miR-142-3p LNA_1	1.00289			altbsPACS1mut+HSUR2+miR-142-3p LNA_2	0.956817			E
F	altbsTP53RKmut+HSUR2+miR16 LNA_1	0.97248			altbsTP53RKmut+HSUR2+miR16 LNA_2	0.978757			altbsPACS1mut+HSUR2+miR-16 LNA_1	0.677938			altbsPACS1mut+HSUR2+miR-16 LNA_2	0.655105			F
G		X	X	X	X	X	X	X		X	X	X		X	X	X	G
H		X	X	X		X	X	X		X	X	X		X	X	X	H
	Experiment_5
	Firefly LUC	1	2	3		4	5	6	7	8	9	10	11	12
A	altbsTP53RKmut+DHSUR2+control LNA_3	127614	126113	127648	altbsPACS1mut+DHSUR2+control LNA_3	55803	53711	60781	X	X	X	X	X	X	A
B	altbsTP53RKmut+DHSUR2+miR142-3p LNA_3	98502	99321	102428	atlbsPACS1mut+DHSUR2+miR-142-3p LNA_3	58831	61564	61598	X	X	X	X	X	X	B
C	altbsTP53RKmut+DHSUR2+miR16 LNA_3	81167	81447	80770	altbsPACS1mut+DHSUR2+miR-16 LNA_3	88051	88721	91064	X	X	X	X	X	X	C
D	altbsTP53RKmut+HSUR2+control LNA_3	227575	224502	231571	altbsPACS1mut+HSUR2+control LNA_3	77155	79673	81242	X	X	X	X	X	X	D
E	altbsTP53RKmut+HSUR2+miR142-3p LNA_3	72472	71500	72588	altbsPACS1mut+HSUR2+miR-142-3p LNA_3	72787	71870	78307	X	X	X	X	X	X	E
F	altbsTP53RKmut+HSUR2+miR16 LNA_3	130346	129272	129666	altbsPACS1mut+HSUR2+miR-16 LNA_3	64665	67466	69367	X	X	X	X	X	X	F
G	X	X	X	X		X	X	X	X	X	X	X	X	X	G
H	X	X	X	X		X	X	X	X	X	X	X	X	X	H
	Renilla LUC
A	altbsTP53RKmut+DHSUR2+control LNA_3	598806	590095	592596	altbsPACS1mut+DHSUR2+control LNA_3	214098	203730	224915	X	X	X	X	X	X	A
B	altbsTP53RKmut+DHSUR2+miR142-3p LNA_3	461238	460759	468905	atlbsPACS1mut+DHSUR2+miR-142-3p LNA_3	218014	226580	222917	X	X	X	X	X	X	B
C	altbsTP53RKmut+DHSUR2+miR16 LNA_3	340302	339730	335122	altbsPACS1mut+DHSUR2+miR-16 LNA_3	338450	340348	344632	X	X	X	X	X	X	C
D	altbsTP53RKmut+HSUR2+control LNA_3	1595061	1598561	1587198	altbsPACS1mut+HSUR2+control LNA_3	460023	474617	472101	X	X	X	X	X	X	D
E	altbsTP53RKmut+HSUR2+miR142-3p LNA_3	325350	316381	317884	altbsPACS1mut+HSUR2+miR-142-3p LNA_3	293319	282658	300598	X	X	X	X	X	X	E
F	altbsTP53RKmut+HSUR2+miR16 LNA_3	684787	673549	666879	altbsPACS1mut+HSUR2+miR-16 LNA_3	337810	344287	346437	X	X	X	X	X	X	F
G	X	X	X	X		X	X	X	X	X	X	X	X	X	G
H	X	X	X	X		X	X	X	X	X	X	X	X	X	H
	Ratio
A	altbsTP53RKmut+DHSUR2+control LNA_3	0.213114	0.213716	0.215405	altbsPACS1mut+DHSUR2+control LNA_3	0.260642	0.263638	0.27024	X	X	X	X	X	X	A
B	altbsTP53RKmut+DHSUR2+miR142-3p LNA_3	0.21356	0.21556	0.218441	atlbsPACS1mut+DHSUR2+miR-142-3p LNA_3	0.26985	0.27171	0.276327	X	X	X	X	X	X	B
C	altbsTP53RKmut+DHSUR2+miR16 LNA_3	0.238515	0.23974	0.241017	altbsPACS1mut+DHSUR2+miR-16 LNA_3	0.26016	0.260677	0.264235	X	X	X	X	X	X	C
D	altbsTP53RKmut+HSUR2+control LNA_3	0.142675	0.14044	0.145899	altbsPACS1mut+HSUR2+control LNA_3	0.16772	0.167868	0.172086	X	X	X	X	X	X	D
E	altbsTP53RKmut+HSUR2+miR142-3p LNA_3	0.222751	0.225993	0.228347	altbsPACS1mut+HSUR2+miR-142-3p LNA_3	0.24815	0.254265	0.260504	X	X	X	X	X	X	E
F	altbsTP53RKmut+HSUR2+miR16 LNA_3	0.190345	0.191927	0.194437	altbsPACS1mut+HSUR2+miR-16 LNA_3	0.191424	0.195959	0.20023	X	X	X	X	X	X	F
G	X	X	X	X		X	X	X	X	X	X	X	X	X	G
H	X	X	X	X		X	X	X	X	X	X	X	X	X	H
	Relative LUC Activity
A	altbsTP53RKmut+DHSUR2+control LNA_3	0.995495	0.998309	1.0062	altbsPACS1mut+DHSUR2+control LNA_3	0.98415	0.995462	1.02039	X	X	X	X	X	X	A
B	altbsTP53RKmut+DHSUR2+miR142-3p LNA_3	0.997578	1.00692	1.02038	atlbsPACS1mut+DHSUR2+miR-142-3p LNA_3	1.01892	1.02594	1.04337	X	X	X	X	X	X	B
C	altbsTP53RKmut+DHSUR2+miR16 LNA_3	1.11415	1.11987	1.12583	altbsPACS1mut+DHSUR2+miR-16 LNA_3	0.982327	0.984282	0.997717	X	X	X	X	X	X	C
D	altbsTP53RKmut+HSUR2+control LNA_3	0.66646	0.656022	0.681522	altbsPACS1mut+HSUR2+control LNA_3	0.633287	0.633847	0.649773	X	X	X	X	X	X	D
E	altbsTP53RKmut+HSUR2+miR142-3p LNA_3	1.04051	1.05566	1.06665	altbsPACS1mut+HSUR2+miR-142-3p LNA_3	0.936979	0.960069	0.983628	X	X	X	X	X	X	E
F	altbsTP53RKmut+HSUR2+miR16 LNA_3	0.889138	0.896525	0.908252	altbsPACS1mut+HSUR2+miR-16 LNA_3	0.722791	0.739913	0.75604	X	X	X	X	X	X	F
G	X	X	X	X		X	X	X	X	X	X	X	X	X	G
H	X	X	X	X		X	X	X	X	X	X	X	X	X	H
	Mean
A	altbsTP53RKmut+DHSUR2+control LNA_3	1			altbsPACS1mut+DHSUR2+control LNA_3	1			X	X	X	X	X	X	A
B	altbsTP53RKmut+DHSUR2+miR142-3p LNA_3	1.00829			atlbsPACS1mut+DHSUR2+miR-142-3p LNA_3	1.02941			X	X	X	X	X	X	B
C	altbsTP53RKmut+DHSUR2+miR16 LNA_3	1.11995			altbsPACS1mut+DHSUR2+miR-16 LNA_3	0.988109			X	X	X	X	X	X	C
D	altbsTP53RKmut+HSUR2+control LNA_3	0.668001			altbsPACS1mut+HSUR2+control LNA_3	0.638969			X	X	X	X	X	X	D
E	altbsTP53RKmut+HSUR2+miR142-3p LNA_3	1.05427			altbsPACS1mut+HSUR2+miR-142-3p LNA_3	0.960225			X	X	X	X	X	X	E
F	altbsTP53RKmut+HSUR2+miR16 LNA_3	0.897972			altbsPACS1mut+HSUR2+miR-16 LNA_3	0.739582			X	X	X	X	X	X	F
G	X	X	X	X		X	X	X	X	X	X	X	X	X	G
H	X	X	X	X		X	X	X	X	X	X	X	X	X	H
