# Supplementary material for: Viral miRNA adaptor differentially recruits miRNAs to target mRNAs through alternative base-pairing
Source: eLife. 2019 Sep 20;8:e50530. doi: 10.7554/eLife.50530 (PMC6763288; doi:10.7554/eLife.50530)
Supplement: Supplementary file 1. — Gene name, genomic coordinates, and ratios of HSUR2 sample pulldown versus Control sample pulldown. [file elife-50530-supp1.xlsx]

## Sheet: Sheet1
Gene	Gene.name	Gene.type	Chromosome.scaffold.name	Gene.start..bp.	Gene.end..bp.	baseMean	log2FoldChange	pvalue	14563X1_plus_normalized	14563X2_minus_normalized	14563X3_plus_normalized	14563X4_minus_normalized	14563X5_plus_normalized	14563X6_minus_normalized
ENSCJAG00000009934	YTHDC1	protein_coding	3	125705158	125741275	344.261	2.28639	4.01283e-36	676.344	113.99	383.732	99.2047	681.454	110.841
ENSCJAG00000007908	HNRNPA2B1	protein_coding	8	29527081	29540686	777.912	1.72862	2.30267e-30	1261.36	303.189	973.26	382.772	1385.73	361.157
ENSCJAG00000000590	NIT2	protein_coding	15	96490014	96508601	154.48	2.69283	7.01242e-26	276.686	32.9042	216.58	44.7738	328.228	27.7103
ENSCJAG00000014087	H3F3B	protein_coding	5	125024021	125026091	569.592	1.34229	1.5378e-19	773.998	293.788	761.174	355.557	934.69	298.347
ENSCJAG00000015116	ZFP36L1	protein_coding	10	94001622	94007662	324.733	1.34679	2.58259e-15	454.814	142.193	490.674	205.433	464.085	191.201
ENSCJAG00000017580	STK4	protein_coding	5	39118657	39226497	151.688	1.68136	8.93453e-13	258.602	48.1812	201.302	71.1113	247.802	83.1308
ENSCJAG00000002931	ZNF330	protein_coding	3	51652603	51666470	66.5602	2.1199	9.64058e-13	158.235	25.8533	63.8056	13.1688	115.206	23.0919
ENSCJAG00000007297	DDIT4	protein_coding	12	51853687	51855801	126.102	1.71694	1.48913e-12	221.53	45.8309	141.091	50.9192	232.586	64.6573
ENSCJAG00000019025	RNF145	protein_coding	2	20241632	20289706	73.0431	1.81264	2.74871e-10	144.672	27.0285	78.1844	25.4596	131.509	31.405
ENSCJAG00000015157	ENSCJAG00000015157	protein_coding	5	74344803	74376461	380.159	1.0162	3.32576e-10	595.87	235.03	456.525	245.817	489.082	258.629
ENSCJAG00000022175	MID1IP1	protein_coding	X	37589474	37591310	93.1748	1.69776	7.88309e-10	188.978	31.7291	93.4618	35.9946	160.854	48.0311
ENSCJAG00000019436	ZNF638*	protein_coding	14	35471221	35577206	96.2771	1.73466	2.06617e-09	177.224	41.1303	113.233	52.6751	168.462	24.9392
ENSCJAG00000001648	PACS1	protein_coding	11	121897612	121959264	93.3652	1.57305	2.84065e-09	166.373	39.9552	111.435	46.5296	154.333	41.5654
ENSCJAG00000019636	PRDX3	protein_coding	12	106961983	106971922	103.557	1.53329	3.08445e-09	155.523	59.9327	106.043	38.6284	214.109	47.1074
ENSCJAG00000032834	ENSCJAG00000032834	protein_coding	9	8816328	8816864	72.8368	1.79748	3.59006e-09	139.247	21.1527	76.387	32.483	139.117	28.6339
ENSCJAG00000001963	SNIP1	protein_coding	7	71926315	71943150	37.1584	1.91711	3.74012e-08	78.6656	14.1018	46.7309	9.65709	60.8635	12.9315
ENSCJAG00000005112	HMGB2	protein_coding	3	16191388	16194305	1626.44	1.47914	8.81393e-08	3243.38	793.227	1650.86	813.83	2556.27	701.07
ENSCJAG00000018576	CD69	protein_coding	9	21843485	21851813	17.5062	2.28033	1.89723e-07	26.2219	0	21.5681	2.63375	49.9951	4.61838
ENSCJAG00000004483	ENSCJAG00000004483	protein_coding	18	39639205	39726010	225.189	1.83471	2.22739e-07	424.071	54.057	277.689	102.716	414.089	78.5124
ENSCJAG00000011553	KIF1C	protein_coding	5	97149416	97176491	181.095	1.07172	2.45319e-07	248.656	110.464	220.174	124.664	278.233	104.375
ENSCJAG00000013271	ANAPC4	protein_coding	3	165702130	165742157	35.7787	1.77276	5.25654e-07	53.348	8.22606	44.0349	11.4129	78.2531	19.3972
ENSCJAG00000014700	ARGLU1	protein_coding	1	21859651	21884147	248.862	0.902889	6.79468e-07	424.975	198.601	271.399	165.926	289.102	143.17
ENSCJAG00000006627	CDKN2D	protein_coding	22	9985043	9987605	132.744	1.18284	1.0065e-06	186.266	86.9612	136.598	73.7451	244.541	68.352
ENSCJAG00000016900	TP53RK	protein_coding	5	40761561	40765444	21.9363	1.97573	1.23354e-06	35.2639	7.05091	30.5548	6.14542	48.9082	3.6947
ENSCJAG00000001071	KDM2A	protein_coding	11	122891111	123039423	110.766	1.14117	1.56445e-06	144.672	68.1588	130.307	54.4309	191.285	75.7414
ENSCJAG00000017609	GFI1	protein_coding	7	128821324	128834713	32.808	1.77228	1.98551e-06	44.3059	15.277	46.7309	11.4129	71.732	7.3894
ENSCJAG00000000713	GLCCI1	protein_coding	8	48459391	48606549	40.3854	1.69866	2.97176e-06	74.1446	7.05091	44.0349	20.1921	79.34	17.5498
ENSCJAG00000008329	ENSCJAG00000008329	protein_coding	6	41088770	41093757	65.6866	1.28295	1.90608e-05	103.079	21.1527	81.779	37.7505	103.251	47.1074
ENSCJAG00000008661	ZDHHC5	protein_coding	11	113525937	113559690	56.9847	1.25877	2.55266e-05	89.5161	36.4297	65.603	28.0934	94.5559	27.7103
ENSCJAG00000022013	MRFAP1L1	protein_coding	3	184627168	184629308	68.6906	1.17644	5.55054e-05	90.4203	22.3279	97.9551	50.9192	104.338	46.1838
ENSCJAG00000012596	ASB8	protein_coding	9	557579	567224	38.604	1.4214	5.70486e-05	79.5698	11.7515	43.1362	17.5584	56.5161	23.0919
ENSCJAG00000006105	FBXL12	protein_coding	22	9191978	9207539	13.0845	1.76844	6.83266e-05	26.2219	1.17515	22.4668	6.14542	20.6501	1.84735
ENSCJAG00000015374	ISCU	protein_coding	9	98640512	98648362	52.969	1.26421	0.000105156	80.474	22.3279	65.603	42.14	86.9479	20.3209
ENSCJAG00000004423	IER5	protein_coding	18	24986035	24988405	124.198	1.01785	0.000118382	170.894	41.1303	168.051	113.251	164.114	87.7492
ENSCJAG00000012641	DCAKD	protein_coding	5	78863348	78891096	126.19	0.903183	0.000147959	265.836	115.165	107.84	75.5009	133.682	59.1152
ENSCJAG00000009307	ZBTB7B	protein_coding	18	8982300	8998292	77.823	1.07015	0.000203143	168.182	44.6558	71.8937	45.6517	91.2953	45.2601
ENSCJAG00000004153	AKT1S1	protein_coding	22	41781217	41789837	19.8601	1.51328	0.000228746	49.7312	5.87576	18.8721	7.02334	29.3449	8.31308
ENSCJAG00000013198	C7ORF55-LUC7L2	protein_coding	8	106701013	106779945	169.116	0.750853	0.000257432	213.392	131.617	211.188	105.35	217.37	135.78
ENSCJAG00000007343	SPSB2	protein_coding	9	18728835	18731232	45.6124	1.21757	0.000286407	60.5816	27.0285	43.1362	23.7038	98.9033	20.3209
ENSCJAG00000012438	TRIOBP	protein_coding	1	200139324	200221160	233.448	0.759827	0.000333286	398.753	151.595	265.108	213.334	231.499	140.399
ENSCJAG00000018049	NCOA6	protein_coding	5	2442285	2559400	58.0075	1.17431	0.000352843	65.1026	49.3564	67.4003	23.7038	118.467	24.0156
ENSCJAG00000023133	RPRM	protein_coding	6	65840324	65841773	61.8495	1.01394	0.000417067	88.6119	43.4806	75.4883	28.9713	90.2085	44.3364
ENSCJAG00000000811	PNRC1	protein_coding	4	88170808	88175348	57.4137	1.03135	0.000439736	71.432	29.3788	97.0564	45.6517	69.5583	31.405
ENSCJAG00000001798	CPSF6	protein_coding	9	58706166	58740159	68.4339	0.977503	0.000474819	95.8455	44.6558	73.691	42.14	110.859	43.4127
ENSCJAG00000007854	ENSCJAG00000007854	protein_coding	1	206128045	206133697	21.907	1.41124	0.000500971	45.2101	9.40121	24.2641	13.1688	34.7792	4.61838
ENSCJAG00000004255	FAM76B	protein_coding	11	41882053	41902914	21.3755	1.41077	0.000530627	32.5513	16.4521	35.0482	7.90126	32.6055	3.6947
ENSCJAG00000020790	RHOV	protein_coding	10	35012398	35014470	11.9972	1.56892	0.000551906	24.4135	9.40121	8.98671	0	28.2581	0.923675
ENSCJAG00000014685	ABHD13	protein_coding	1	23537247	23550531	12.2228	1.49709	0.000733802	31.6471	3.52546	8.08804	2.63375	22.8238	4.61838
ENSCJAG00000010152	SQSTM1	protein_coding	2	59451500	59466417	167.055	0.693623	0.00120541	176.32	90.4867	212.985	164.171	233.673	124.696
ENSCJAG00000008938	COX17	protein_coding	15	77214153	77223092	117.985	0.761346	0.00136534	186.266	81.0855	150.078	99.2047	117.38	73.894
ENSCJAG00000005608	TRAPPC10	protein_coding	21	47836883	47929799	72.4716	0.857923	0.00172471	99.4623	48.1812	77.2857	49.1634	110.859	49.8785
ENSCJAG00000008073	NCK2	protein_coding	14	10396835	10548302	79.0183	0.867553	0.00191876	133.822	45.8309	102.448	53.553	79.34	59.1152
ENSCJAG00000002454	ENSCJAG00000002454	protein_coding	7	36612856	36626884	19.9382	1.3172	0.00202188	23.5093	3.52546	18.8721	14.9246	53.2556	5.54205
ENSCJAG00000000664	CPOX	protein_coding	15	98312589	98325016	77.7673	0.879301	0.00382158	124.78	28.2036	106.942	70.2334	78.2531	58.1916
ENSCJAG00000020202	STOM	protein_coding	1	164975436	165008116	59.6232	0.864023	0.00383926	59.6774	22.3279	86.2724	59.6984	89.1216	40.6417
ENSCJAG00000016632	VGLL4	protein_coding	15	63543211	63711335	39.1252	0.953645	0.0039997	67.8152	32.9042	36.8455	14.0467	55.4293	27.7103
ENSCJAG00000023383	HNRNPA3	protein_coding	12	50145917	50146831	19.6269	1.14069	0.00425873	37.0723	12.9267	17.9734	7.02334	32.6055	10.1604
ENSCJAG00000009416	SUCO*	protein_coding	18	34081670	34159391	25.1404	1.08644	0.00440374	38.8807	8.22606	27.8588	13.1688	42.3871	20.3209
ENSCJAG00000007530	NGDN*	protein_coding	10	47433139	47530751	44.4031	0.898933	0.0048795	71.432	27.0285	57.5149	30.7271	51.0819	28.6339
ENSCJAG00000009828	APLP1	protein_coding	22	29688864	29701590	91.7654	1.10819	0.00559631	130.205	81.0855	97.0564	38.6284	174.983	28.6339
ENSCJAG00000013013	IRF1	protein_coding	2	72963631	72971638	69.5391	0.759435	0.00633162	98.5581	47.0061	83.5764	58.8205	85.8611	43.4127
ENSCJAG00000022413	RRAGA	protein_coding	1	121008809	121010464	10.9319	1.23774	0.00653307	22.6051	3.52546	14.3787	8.77918	16.3027	0
ENSCJAG00000018688	POLR2G	protein_coding	11	118451512	118456760	33.0973	0.972445	0.00690378	54.2522	12.9267	40.4402	28.0934	43.474	19.3972
ENSCJAG00000005681	CD48	protein_coding	18	14260799	14278686	30.5846	0.950374	0.00725223	53.348	22.3279	33.2508	14.0467	40.2134	20.3209
ENSCJAG00000017521	RAB7A	protein_coding	15	68228466	68310890	369.635	0.752594	0.00837481	635.655	289.087	340.596	298.492	455.39	198.59
ENSCJAG00000017934	RGS3	protein_coding	1	156914338	157033031	89.5566	0.672512	0.00881883	113.025	62.283	106.942	80.7684	115.206	59.1152
ENSCJAG00000016303	ENSCJAG00000016303	protein_coding	2	9236337	9238024	98.9899	0.658956	0.00905205	122.067	54.057	118.625	84.2801	127.161	87.7492
ENSCJAG00000016069	KLF10	protein_coding	16	91869648	91877377	29.6834	0.946756	0.00920145	52.4438	24.6782	31.4535	19.3142	39.1266	11.0841
ENSCJAG00000005346	PDXDC1	protein_coding	12	12053925	12128777	91.8026	1.09059	0.0111558	163.661	30.5539	72.7923	60.5763	182.591	40.6417
ENSCJAG00000003638	GTF2H5	protein_coding	4	159207039	159224346	31.0256	0.889617	0.0117058	39.7849	21.1527	39.5415	14.9246	46.7345	24.0156
ENSCJAG00000001557	C1orf216	protein_coding	7	70066354	70071533	39.9389	0.886161	0.0124377	67.8152	14.1018	28.7575	23.7038	67.3846	37.8707
ENSCJAG00000019702	MAX	protein_coding	10	90024842	90053299	68.5745	0.762594	0.0127605	87.7077	34.0794	62.0083	64.088	117.38	46.1838
ENSCJAG00000003247	IP6K2	protein_coding	15	24377192	24383721	43.012	0.853292	0.0139333	57.869	21.1527	33.2508	34.2388	84.7742	26.7866
ENSCJAG00000005740	CASP3	protein_coding	3	4776486	4797547	53.9072	0.767704	0.0166801	59.6774	50.5315	63.8056	38.6284	85.8611	24.9392
ENSCJAG00000004804	CBLB	protein_coding	15	91099914	91297742	16.6674	0.997837	0.0183204	32.5513	5.87576	20.6694	15.8025	19.5633	5.54205
ENSCJAG00000018984	ENSCJAG00000018984	protein_coding	9	20283301	20295698	59.0887	0.671899	0.0204787	112.121	59.9327	46.7309	28.9713	65.2109	41.5654
ENSCJAG00000019735	KCMF1	protein_coding	14	21512337	21545929	22.1664	0.890944	0.0214078	26.2219	10.5764	28.7575	17.5584	36.9529	12.9315
ENSCJAG00000021101	AVEN	protein_coding	10	43098201	43293175	15.3667	0.955212	0.0261615	23.5093	2.3503	18.8721	8.77918	23.9107	14.7788
ENSCJAG00000005126	RASSF1	protein_coding	15	26042427	26052111	51.6719	0.706975	0.0267478	64.1984	21.1527	39.5415	34.2388	94.5559	56.3442
ENSCJAG00000002653	PRDM16	protein_coding	7	37634834	37684928	23.9658	0.875729	0.0281442	48.827	25.8533	21.5681	16.6804	27.1712	3.6947
ENSCJAG00000017657	MGEA5	protein_coding	12	89095596	89129495	72.0655	0.612152	0.0291397	91.3245	39.9552	72.7923	60.5763	102.164	65.581
ENSCJAG00000037004	FDX1L	protein_coding	22	9716087	9730290	14.0446	0.923353	0.0302338	25.3177	7.05091	11.6827	6.14542	23.9107	10.1604
ENSCJAG00000007090	MITD1	protein_coding	14	3291983	3308287	29.6616	0.786201	0.0314152	48.827	16.4521	30.5548	25.4596	39.1266	17.5498
ENSCJAG00000021374	CDYL	protein_coding	4	23731885	24005547	30.2722	0.764522	0.0319837	37.9765	17.6273	37.7442	26.3375	43.474	18.4735
ENSCJAG00000008013	CNIH4	protein_coding	19	630652	659773	25.8852	0.80849	0.0322985	37.0723	19.9776	27.8588	20.1921	39.1266	11.0841
ENSCJAG00000006277	CYB5R1	protein_coding	19	24662724	24668412	14.5879	0.906778	0.0325539	28.0303	14.1018	15.2774	7.02334	18.4764	4.61838
ENSCJAG00000006947	SPCS1	protein_coding	15	28479213	28481533	30.2089	0.760044	0.0328236	33.4555	16.4521	37.7442	25.4596	47.8214	20.3209
ENSCJAG00000000769	AKIRIN2	protein_coding	4	86766739	86789579	19.2886	0.875187	0.0330672	24.4135	3.52546	31.4535	15.8025	23.9107	16.6262
ENSCJAG00000004749	SMAD7	protein_coding	13	86814142	86844562	63.8687	0.639371	0.0333114	99.4623	39.9552	60.2109	58.8205	80.4268	44.3364
ENSCJAG00000009991	DIDO1	protein_coding	5	56909296	56917616	20.0513	0.842335	0.0333589	32.5513	19.9776	26.0615	9.65709	22.8238	9.23675
ENSCJAG00000006210	SH2B1	protein_coding	12	27392855	27419257	42.4907	0.700657	0.0340573	76.8572	28.2036	34.1495	27.2154	54.3425	34.176
ENSCJAG00000011876	BRAP	protein_coding	9	101813193	101861878	20.1942	0.840089	0.0355725	11.7546	3.52546	35.0482	20.1921	35.866	14.7788
ENSCJAG00000008790	CGGBP1	protein_coding	21	6300520	6402231	48.9929	0.65009	0.0379287	35.2639	29.3788	60.2109	28.0934	90.2085	50.8022
ENSCJAG00000012537	CBX7	protein_coding	1	200005456	200029229	41.4266	0.681225	0.0379779	28.9345	18.8024	59.3123	40.3842	70.6452	30.4813
ENSCJAG00000020068	ENSCJAG00000020068	protein_coding	12	18380623	18390875	56.972	0.603169	0.0383093	73.2404	49.3564	73.691	47.4076	63.0372	35.0997
ENSCJAG00000012796	TMEM120A	protein_coding	2	9027511	9034467	17.0117	0.872767	0.0383238	30.7429	4.70061	23.3654	17.5584	17.3896	8.31308
ENSCJAG00000012289	SARAF	protein_coding	13	27993786	28014522	33.7739	0.721626	0.0391215	38.8807	25.8533	45.8322	30.7271	45.6477	15.7025
ENSCJAG00000021620	ATF7IP	protein_coding	9	6966130	7096201	40.1398	0.677826	0.0396521	54.2522	22.3279	48.5282	32.483	49.9951	33.2523
ENSCJAG00000004657	TIPARP	protein_coding	17	20671001	20704006	14.7392	0.863689	0.0396623	18.9883	8.22606	17.0747	7.90126	26.0844	10.1604
ENSCJAG00000020688	MGA	protein_coding	10	34122180	34235704	48.5388	0.639252	0.0407972	55.1564	45.8309	56.6163	28.9713	69.5583	35.0997
ENSCJAG00000012711	MED28	protein_coding	3	173681453	173690888	27.4729	0.755165	0.0441223	28.0303	19.9776	33.2508	22.8259	47.8214	12.9315
ENSCJAG00000011804	TBRG4	protein_coding	8	12643262	12656611	18.8433	0.813626	0.0446475	27.1261	17.6273	14.3787	7.90126	35.866	10.1604
ENSCJAG00000014865	SNRPA	protein_coding	22	34167273	34181947	22.3166	0.793891	0.0454978	29.8387	10.5764	35.9468	10.535	23.9107	23.0919
ENSCJAG00000014207	NAXD	protein_coding	1	25969821	25994250	22.792	0.779328	0.0460025	51.5396	19.9776	25.1628	19.3142	15.2159	5.54205
ENSCJAG00000011890	GATD1	protein_coding	11	129755077	129766507	11.6267	0.893189	0.0467438	22.6051	1.17515	17.9734	7.90126	10.8685	9.23675
ENSCJAG00000009561	PRC1	protein_coding	6	16670442	16697644	51.2594	0.620963	0.0468535	75.0488	49.3564	55.7176	45.6517	58.6898	23.0919
ENSCJAG00000017987	CSNK1D	protein_coding	5	131437503	131464766	41.494	0.635254	0.0476757	51.5396	29.3788	57.5149	34.2388	46.7345	29.5576
ENSCJAG00000004141	SLC4A7	protein_coding	17	58046298	58125172	45.0153	0.627383	0.0491812	54.2522	29.3788	53.0216	43.018	60.8635	29.5576
ENSCJAG00000006503	ENSCJAG00000006503	protein_coding	9	46655359	46678350	51.6106	0.612441	0.0492403	80.474	36.4297	47.6296	43.8959	65.2109	36.0233
ENSCJAG00000007331	PRKACB	protein_coding	7	120010818	120168502	28.9066	0.720353	0.0493332	28.0303	18.8024	45.8322	30.7271	38.0397	12.0078
* HSUR2 target mRNAs previously identified in C. Gorbea, T. Mosbruger, D. Cazalla, Nature 550, 275-279 (2017) are highlighted in red
