# Supplementary material for: Viral miRNA adaptor differentially recruits miRNAs to target mRNAs through alternative base-pairing
Source: eLife. 2019 Sep 20;8:e50530. doi: 10.7554/eLife.50530 (PMC6763288; doi:10.7554/eLife.50530)
Supplement: Supplementary file 2. [file elife-50530-supp2.xlsx]

## Sheet: Sheet1
Gene	Binding site.name	Gene.type		Binding site location	mRNA sequence engaged in base-pairing	HSUR2 sequence engaged in pase-pairing	DG of binding (kcal/mol)	Binding pattern	Distance to putative crosslinking site (nts)	MFE of heterodimer (kcal/mol)		Length of target sequence engaged in base-pairing	Length of HSUR2 sequence engaged in base-pairing		sequence in mutant mRNA	sequence in mutant HSUR2	Binding pattern for interaction between mutants	DG of binding for interactions between mutants (kcal/mol)	MFE of heterodimer between mutants (kcal/mol)			Base-pairing determined at drop (D) or edge (E) of peak	miR-16 BS base-pairs with target mRNA	miR-142-3p BS base-pairs with target mRNA
ENSCJAG00000009934	YTHDC1_1	protein_coding		coding	AGAGCGAGAUAGAGGACGUGAUAGAGAAAGAGAAAGAGAGCGAUUAUGUGA	CUACAUAUUUAUUGUUUAUUUAUACCUGAUAAUGCUGCUUUAAUCACACACGAGGUAUCGCUUC	-15.33	.((((((..........(((((((((..((..(((..(((((((((((((.&.))))))...))))))).))).............)).)))).)))))..........)))))).	14	-20.6		51	64									D	Yes	Yes
ENSCJAG00000009934	YTHDC1_2	protein_coding		coding+3'UTR	GAGAGAGGUCGAUAUCGAAGAUAAUCCGAUUUUGGAAGCAAUGAUUGUUUAAAGAUACAAAAAAUC	UAUUUAUUGUUUAUUUAUACCUGAUAAUGCUGCUUUAAUCACACACGAGGUAUCGCUUCUACUA	-13.71	.(((((((.(((((((...........((((..((.((((......((.((((...((((.((((.&.)))).))))...)))).)).......)))).))..))))........)))))))))))).)).	5	-25.2		66	64		GACACAUCUGCAUAGGGAAGAUAAUCCGAUUUUGGAAGCAAUGAUUGUUUAAAGAUACAAAAAAUC	UAUUUAUUGUUUAUUUAUACCUGAUAAUGCUGCUUUAAUCACACACGACUUAUGCGGUGUAGUA	.(((((.(((((((((...........((((..((.((((......((.((((...((((.((((.&.)))).))))...)))).)).......)))).))..))))........)))))))))))).)).	-12.45	-24.9			E	Yes	No
ENSCJAG00000007908	HNRNPA2B1_1	protein_coding		3'UTR	UGGCAGAAGACACCAGAGCAGAUGCAG	CUGAUAAUGCUGCUUUAAUCACACACGAGGUAUCGCUUCUACUA	-10.58	(((.(((((..((((((((((…(((&)))……)))))))…………)))….))))).)))	5	-14.8		27	44									D	Yes	No
ENSCJAG00000007908	HNRNPA2B1_2	protein_coding		3'UTR	GUAGAAGCAUUCCUUCUUUGAUAAUGUUAAAUUUGUAAGUUUCAGGUGACAUGUGAAA	GUUUAUUUAUACCUGAUAAUGCUGCUUUAAUCACACACGAGGUAUCGCUUCUAC	-16.49	((((((((((.((((…((…..((((((…(((….(((((((….(((((.&.)))))…)))))))…)))…))))))….)).)))).)).))))))))	3	-27.7		58	54									D	Yes	No
ENSCJAG00000007908	HNRNPA2B1_3	protein_coding		3'UTR	UUAGCCAGGAUCAUGGUGUAAUAAGACA	UGUUUAUUUAUACCUGAUAAUGCUGC	-14.05	.(((.((..((((.(((((((..(((((&)))))..)))))))))))..))))).	3	-17.7		28	26									D	Yes	No
ENSCJAG00000000590	NIT2_1	protein_coding		coding	GCAGUGGAGAUGAAAAAGCCCUAAAG	AUUUAUUGUUUAUUUAUACCUGAUAAUGCUGC	-8.73	(((((((..(((((.((((..((((.&.))))..)))).))))).)).......)))))	4	-10.2		26	32									D	Yes	No
ENSCJAG00000000590	NIT2_2	protein_coding		3'UTR	AUGAUUCUGCAGCAUAAUCAA	CUGAUAAUGCUGCUUUAAUCAC	-15.76	.(((((..(((((((.((((.&.)))).)))))))...))))).	6	-17.9		21	22									E	Yes	No
ENSCJAG00000014087	H3F3B	protein_coding		3'UTR	GUGAAGGCAGUUUUUAU	GAUAAUGCUGCUUUAAUCAC	-11.62	(((((((((((..((((.&.)))).)))))))…))))	13	-11.2		17	20									E	Yes	No
ENSCJAG00000015116	ZFP36L1	protein_coding		3'UTR	AAGUGGGGAGGAAGGGGAAGCUAGAUGGACUAUGAGA	UUUAUUGUUUAUUUAUACCUGAUAAUGCUGCUU	-13.04	((((((…….(((…..(((((((((.(((((.&))))).)))))))))..)))…….))))))	14	-15.3		37	33									E	Yes	No
ENSCJAG00000017580	STK4_1	protein_coding		coding	ACGAUGGUUCGAGCAGUGGGUGAAGAGAUGGGCACUGUCCGAGUAGC	ACUACAUAUUUAUUGUUUAUUUAUACCUGAUAAUGCUGCUUUAAUCACACACGAGGUAUCGC	-13.25	.(((((.(((((((((((((((...(((((((((.((.....((((.&.)))).....)).))))))))).)))))......))))))...........)))).))))).	0	-29		47	62									D	Yes	Yes
ENSCJAG00000017580	STK4_2	protein_coding		coding	CAGCUGGGCACCAUGGUGAUCAAUGCAGAGGAUGAGGAAGAGGAAGGGACUAUGAA	AUUUAUUGUUUAUUUAUACCUGAUAAUGCUGCUUUAAUCACACACGAGGUAUCGCUU	-17.88	.(((.((..(((.(((((((.((.((((...((.(((.....(((.((((.(((((&.))))).)))).)))...))).))....)))).)).))))).))...))).))))).	0	-25.9		56	57									D	Yes	No
ENSCJAG00000017580	STK4_3	protein_coding		coding	AGAUUGAAGAGAUCCGGCAGAAGUACCAGU	AUUUAUUGUUUAUUUAUACCUGAUAAUGCUGCUUUAAUCACACACGAGGUAUCGCUU	-11.64	.((((((((.....(((((.......(((.&.)))....))))))))))))).	4	-13.2		30	57									D	Yes	No
ENSCJAG00000017580	STK4_4	protein_coding		coding+3'UTR	AGAGGCGGCAGCAAAACUUCUGAGCAAG	AUUGUUUAUUUAUACCUGAUAAUGCUGCUUUA	-11.59	.(((((((((..........(((((((.&.)))))))..............))))))))).	10	-15.2		28	32									D	Yes	No
ENSCJAG00000017580	STK4_5	protein_coding		3'UTR	AGGAAUGUGCGCCAGUGG	ACACGAGGUAUCGCUUCUA	-7.62	.((((.(((.(((.(((.&.)))..)))..))))))).	3	-11.6		18	19		AGGAAUCGCCGGGACUCGCAAGGGCUCUCUUGACAGU	CCUGAUAAUGCUGCUUUAAUGACAGAGGACCUAUGUGUUCUA	.((((.(((.((..(((.(((((((....(((.(((.&.))).)))....)))))..))...)))..))...))))))).	-7.61	-17.6			D	No	No
ENSCJAG00000002931	ZNF330_1	protein_coding		3'UTR	GGGUAGAGCGUAGCAUUUUUAUGG	ACCUGAUAAUGCUGCUUUAAUCA	-14.51	((.((((((..((((((.(((.((&.))))).)))))))))))).)).	6	-15.1		24	23									D	Yes	No
ENSCJAG00000002931	ZNF330_2	protein_coding		coding	GAUGAAGGCAG	CUGCUUUAAUC	-9.22	(((.(((((((&))))))).)))	4	-8.7		11	11									D	Yes	No
ENSCJAG00000002931	ZNF330_3	protein_coding		coding	AUGUGGGCAUGAAACUCAGGAGACGAA	AUUGUUUAUUUAUACCUGAUAAUGCUGCUUUAAUCACAC	-11.77	.(((((((((.....(((((((((((.&.)))))).......)))))..)))))........)))).	0	-13.5		27	39									D	Yes	No
ENSCJAG00000007297	DDIT4_1	protein_coding		coding	GUCCCUGACGCUGAGCACUGGCUUCCGGGU	ACCUGAUAAUGCUGCUUUAAUCACACACG	-4.19	((…(((….(((((…((…(((((&)))))…..)))))))…)))…)).	3	-11.6		30	29									D	Yes	No
ENSCJAG00000007297	DDIT4_2	protein_coding		3'UTR	GGGGUGGAGACUUUUGGGCAG	CUGCUUUAAUCACACACGAGGUAUCGCUUC	-9.47	(((((((..((((((((((((&)))))………)).))))).)))))))	4	-12.3		21	30									D	Yes	No
ENSCJAG00000007297	DDIT4_3	protein_coding		3'UTR	CGUGGAGGUGGUUUGUGUA	CACACGAGGUAUCGCUUCUACU	-16.72	.(((((((((((((((((.&.))))))…))))))))))).	12	-19.8		19	22									E	No	No
ENSCJAG00000019025	RNF145_1	protein_coding		3'UTR	AUGGGACAGAUCAAUCUCA	CGAGGUAUCGCUUCUAC	-3.53	.(((((..(((..(((((.&.))))))))..))))).	4	-9.1		19	17									D	No	No
ENSCJAG00000019025	RNF145_2	protein_coding		3'UTR	GUGAGGAUAAAGAGCGUGAGG	CCUGAUAAUGCUGCUUUAAUCAC	-12.13	((((…((((((((((.(((&))).))…))).))))).))))	3	-12		21	23									D	Yes	No
ENSCJAG00000015157	ENSCJAG00000015157	protein_coding		3'UTR	AGUGACCUGGAUCCCGUGUGUGAUGCGGUCUCUUAUC	GAUAAUGCUGCUUUAAUCACACACGAGGUAUCGCUUCUACU	-17.07	((((…..((((((((((((((((((((…(((((&))))).)))))….)))))))))).)).)))…..))))	4	-29.5		37	41									E	Yes	No
ENSCJAG00000022175	MID1IP1	protein_coding		coding	AAAGCCAACAUCCUCACUAACAGAUACAAGCAGGAGAUCGGUUUCAGCAAUU	UAUUGUUUAUUUAUACCUGAUAAUGCUGCUUUAAUCACACACGAGGUAUCGCUUC	-11.3	.((((……((((…….(((..((((((…((((((…((((((.&.))))))…….))).)))….))))))..)))……))))….)))).	4	-22.6		52	55									D	Yes	No
ENSCJAG00000019436	ZNF638*_1	protein_coding		coding	CUCAGGUGAAAAAGCAAUGAC	UUUAUUGUUUAUUUAUACCUGAU	-15.72	.(((((((((((((((((((.&.))))))))).))).))))))).	3	-16.3		21	23									E	No	No
ENSCJAG00000019436	ZNF638_2	protein_coding		3'UTR	UGUUUAGGGUCCAGUUGAUUUGUGUA	UAUACCUGAUAAUGCUGCUUUAAUCA	-8.89	((.((((((..((((..(((.(((((&)))))..)))…)))))))))).))	0	-8.4		26	26									D	Yes	No
ENSCJAG00000019436	ZNF638_3	protein_coding		coding+3'UTR	AAGAAGCUGUAGGUGAUUGGGGGAAAGGGGAAAGAAUUCACUAGAAAUU	UAUUUAUUGUUUAUUUAUACCUGAUAAUGCUGCUUUAAUCACACACGAGGUAUCGCUUCUA	-14.08	.(((((((((..((((((((((....(((....((((..((...((((.&.))))...))..))))...)))..........))))))))))..))).......)))))).	5	-21.2		49	61									D	Yes	No
ENSCJAG00000001648	PACS1	protein_coding		3'UTR	CUGAGAUGUCGUGUGUGU	UCACACACGAGGUAUCGC	-17.04	.(((.((.(((((((((.&.))))))))).)).))).	8	-18.5		18	18		CUCAGAUGUGCUCUCUCU	UGAGAGAGCAGGUAUGGC	.(((.((.(((((((((.&.))))))))).)).))).	-20.03	-20.1			D	No	No
ENSCJAG00000019636	PRDX3	protein_coding		3'UTR	UGCUUUUAUCAUUUUAAAGAUAGUUAUUUGUAGA	ACUACAUAUUUAUUGUUUAUUUAUACCUGAUAAUGCU	-10.35	.((..((((((...((((((((((....(((((.&.))))).....))))))..))))....)))))).)).	22	-13.2		34	37									D	Yes	Yes
ENSCJAG00000032834	ENSCJAG00000032834	protein_coding		coding	CAGAAGCAGAGGAUGCUGGAAGAGAGAAGAGCUGCAA	AUGCUGCUUUAAUCACACACGAGGUAUCGCUUCUACU	-13.77	.((((((….((((((……((..(((((.(((.&.))).)))))..))……..)))))))))))).	10	-22.5		37	37									D	Yes	No
ENSCJAG00000001963	SNIP1	protein_coding		coding+3'UTR	GAGGAGGAGGAGGAAGAAGUGUCUGACAGCUAGCAAACUAAGA	CCUGAUAAUGCUGCUUUAAUCACACACGAGGUAUCGCUUCUACUA	-15.31	.((.(((((((…….((((.(((.(((.((((…..((.&.))…..)))))))….))).))))……)).))))).)).	13	-20.2		43	45									D	Yes	No
ENSCJAG00000005112	HMGB2	protein_coding		3'UTR	AGUGUGGAGUGUGCGUGUGUGCUCAGGCAAUUGUU	GAUAAUGCUGCUUUAAUCACACACGAGGUAUCGCUUCUACU	-17.13	((((.((((((..((((((((…(((((((((((&))))))..)))))….))))))))……))))))))))	3	-26		35	41									D	Yes	No
ENSCJAG00000018576	CD69	protein_coding		3'UTR	CAGGGAAAAGUGUUGGAAAAUGUG	CAUAUUUAUUGUUUAUUUAUACCUG	-9.77	((((…(((((…(((((((((&))))))).))…)))))…))))	3	-9.6		24	25		GACCGAAUAUUUUUGUUAUAUGUG	CAUAUAUAAGGUUGAGUAAUAGGUC	((((...(((((...(((((((((&)))))))))....)))))...))))	-13.46	-14.4			D	No	Yes
ENSCJAG00000004483	ENSCJAG00000004483_1	protein_coding		3'UTR	GGCAUUUUAUAUAUAGAUGGACAG	UGUUUAUUUAUACCUGAUAAUGCU	-14.4	(((((((((..((((((((((((&))))))))))))..))).))))))	34	-16.2		24	24									D	Yes	No
ENSCJAG00000004483	ENSCJAG00000004483_2	protein_coding		3'UTR	AGCGGGGCAUUUUAGGAUGUCAGAGC	GUUUAUUUAUACCUGAUAAUGCUGCU	-8.57	(((..((((((((((((((…((((&))))…))).))))).)))))))))	2	-14.3		26	26									D	Yes	No
ENSCJAG00000004483	ENSCJAG00000004483_3	protein_coding		3'UTR	GUUUGUAUAUUUGAGGCAUUUAAAAAUCUAUUUUCGUUACAAGGGCAAAUGAAGAAUGAC	UUUAUUGUUUAUUUAUACCUGAUAAUGCUGCUUUAAUCACACACG	-14.55	((.(((....((((((((................(((((..(((..(((((((.(((((.&.))))).)))))))...)))..))))).))))))))..))).)).	3	-20.9		60	45									D	Yes	No
ENSCJAG00000011553	KIF1C_1	protein_coding		3'UTR	AUGAGAAAGAAGGUCCGAGUAGGUGAUGGAAGACGAGUGGAUA	UAUUUAUUGUUUAUUUAUACCUGAUAAUGCUGCUUUAAUCAC	-12.62	.(((.((((..(((.....((((((.((((((((.((((((((&)))))))))))).)))))))))).....))).))))..))).	1	-17.6		43	42									D	Yes	No
ENSCJAG00000011553	KIF1C_2	protein_coding		3'UTR	AGGAAGCUGCCUCGG	ACGAGGUAUCGCUUCUA	-15.07	.(((((((((((((.&.)))))))..)))))).	11	-19.3		15	17									E	No	No
ENSCJAG00000013271	ANAPC4_1	protein_coding		coding	UAAGCUCCAAUCUUCGUCAUGUGAGAGUAUUUGAAAUGGACAUAGAUGAUGAAUGG	AUAUUUAUUGUUUAUUUAUACCUGAUAAUGCUGCUUUAAUCACACACGAGGUAUCGCUUC	-9.88	.((((......((((((..((((((((((........((..((((((((((((((.&.)))))))))))))).....)).........)))))...))))).))))))....)))).	5	-24.8		56	60									E	Yes	No
ENSCJAG00000013271	ANAPC4_2	protein_coding		3'UTR	UGUGUGAUUAUGGCCAAAAGGACCUAGGAGAUGGAC	GUUUAUUUAUACCUGAUAAUGCUGCUUUAAUCACACA	-17.36	((((((((((.(((……….((((((((((((&))))))))…))))……..))).))))))))))	0	-21.4		36	37									D	Yes	No
ENSCJAG00000014700	ARGLU1	protein_coding		coding	GGUGGAGGAAGCCAAGCGCAUCAUGGAAAAGCAGUUGCUCGA	CUGAUAAUGCUGCUUUAAUCACACACGAGGUAUCGCUUCUACU	-13.23	((((((((..(((…((…..(((.((((((((…(((.&.)))….))))))))..)))….)).)))….))))))))	7	-21.7		42	43									D	Yes	No
ENSCJAG00000006627	CDKN2D	protein_coding		3'UTR	GGUGGGAGAGCGUCCUAAAUCAAUAAGAAGGUAGCAU	AUGCUGCUUUAAUCACACACGAGGUAUCGCUUCUACU	-16.57	((((((((…..(((………..((((((((((&))))))))))………..)))…..))))))))	2	-24.1		37	37									D	Yes	No
ENSCJAG00000016900	TP53RK	protein_coding		3'UTR	UGAAGAAAUGCUGCAAGUAAGAGAGUAGAUUUAAGUAAAGGUGUU	UAUACCUGAUAAUGCUGCUUUAAUCACACACGAGGUAUCGCUUCU	-15.16	.((((..(((((....((..((((((((..(((.....((((((.&.))))))..)))..))))))...))..))....)))))..)))).	3	-22.5		45	45		UGAAGAAAUGCUGCAACUAACAUACAACAUUUAAGUAAAGGUGUU	UAUACCUGAUAAUGGUUGUAUAAUGACAGACGAGGUAUCGCUUCU	.((((..(((((....((..((((((((..(((.....((((((.&.))))))..)))..))))))...))..))....)))))..)))).	-11.47	-21.1			D	Yes	No
ENSCJAG00000001071	KDM2A_1	protein_coding		3'UTR	AGAAGAGAGACGCC	GGUAUCGCUUCU	-8.26	(((((.((…(((&))).)).)))))	8	-7.5		14	12									D	No	No
ENSCJAG00000001071	KDM2A_2	protein_coding		3'UTR	GGUCGGAAUUUCUUUUGGGUCAAUAU	UUAUUGUUUAUUUAUACCUGAUA	-3.88	.(((((.........((((.(((((.&.))))))))).......))))).	4	-5.9		26	23									D	No	No
ENSCJAG00000001071	KDM2A_3	protein_coding		3'UTR	UUGAUUCUGCCCAGCACUCGUAUUCGUUCACAUAAUGAGG	AUUUAUUGUUUAUUUAUACCUGAUAAUGCUGCUUUAAUCAC	-8.02	.(((((.....(((((.((((((..((....((((((((.&.))))))))..))..))))..))...)))))....))))).	6	12		40	41									D	No	No
ENSCJAG00000017609	GFI1_1	protein_coding		3'UTR	CAUUUCCAGCCCUAAUCUACAGACAGGAAUAU	AUAUUUAUUGUUUAUUUAUACCUGAUAAUG	-5.08	((((..(((…(((…..(((((.((((((&))))))..)))))..)))…)))..))))	0	-6.8		32	30									D	Yes	Yes
ENSCJAG00000017609	GFI1_2	protein_coding		3'UTR	CUGAGAAGACAACAAAG	AUUUAUUGUUUAUUUAU	-5.42	.((((.((((((.(((.&.))).)))))).)))).	0	-4.5		17	17									D	No	No
ENSCJAG00000000713	GLCCI1	protein_coding		3'UTR	UAGGGGAACAAGGUGCCUACAGUUAAAGGAACGUUUCAG	CUGAUAAUGCUGCUUUAAUCACACACGAGGUAUCGCUUCUACUA	-11.59	(((.((((...(((((((...(((((((...((((((((&)))).))))...)))))))........)))))))..)))).)))	6	-20.3		39	44									E	Yes	No
ENSCJAG00000008329	ENSCJAG00000008329	protein_coding		3'UTR	UUAGCCAGGAGAGAGAGC	GUUUAUUUAUACCUGAUAAUGCUGC	-7.47	.((((((((.(((.((((&)))).)))…))))…..)))).	0	-7.5		18	25									D	Yes	No
ENSCJAG00000008661	ZDHHC5_1	protein_coding		3'UTR	GGAGGGAACCAGAUCAUUUUUAAACCAG	CUGCUUUAAUCACACACGAGGUAUCGCUUC	-7.36	((((.(((((………(((((.(((&))).)))))……….))).)).))))	10	-11.1		28	30									D	Yes	No
ENSCJAG00000008661	ZDHHC5_2	protein_coding		3'UTR	GACACUGGUGGUGGUUGGGGAAGAUCAGGAAAAUAAC	UUUAUUUAUACCUGAUAAUGCUGCUUUAAUCACACACGAGGUA	-21.34	.((.((.(((((((((((((.((((((((.&.))))))…))))))….)).)))))))))).))).)))).	3	-27.8		37	43									D	Yes	No
ENSCJAG00000022013	MRFAP1L1_1	protein_coding		3'UTR	AGAUGGAAGUGGUUUUGUAUAUAUUUUGGAACU	UGUUUAUUUAUACCUGAUAAUGCUGCUUUAAUCA	-12.08	.(((.((((((((.((((…(((….((((.&.))))….)))….)))).)))))))).))).	4	-14.2		33	34									D	Yes	No
ENSCJAG00000022013	MRFAP1L1_2	protein_coding		3'UTR	ACCUUAUGUGACAAGGCAGUGAGUAUGGA	ACCUGAUAAUGCUGCUUUAAUCACACACGAGGU	-17.06	(((((.(((((.(((((((((.((..((.&.))..))..)))))))))..)))))…)))))	3	-22.2		29	33									D	Yes	No
ENSCJAG00000012596	ASB8_2	protein_coding		3'UTR	AUGGAAAGUACUUAAUGAACGUGUGUGU	ACACUACAUAUUUAUUGUUUAUUUAUACCU	-12.76	..((.(((((..(((((((.((((((((&)))).)))).)))))))..)))))...)).	11	-13		28	30									D	No	Yes
ENSCJAG00000006105	FBXL12	protein_coding		3'UTR	UAGAGGAAAGAGGCCC	AGGUAUCGCUUCUA	-8.72	((((((…((.(((.&.))).)).))))))	4	-8.9		16	14									D	No	No
ENSCJAG00000015374	ISCU_1	protein_coding		coding	AGUGGAUGAAAAGGGGAAGAUCGUGGAUGCUAGGUUUAAAACAU	UUGUUUAUUUAUACCUGAUAAUGCUGCUUUAAUCACACACG	-15.25	.(((..(((((((.((...((((.((.((.(((((...(((((.&.))))))))))))))))))....)).))))..)))..))).	4	-17.5		44	41									D	Yes	No
ENSCJAG00000015374	ISCU_2	protein_coding		3'UTR	AGUAGAAUGCCUUGGUCUG	UCACACACGAGGUAUCGCUUCUACUA	-13.63	((((((((((((((((.((&.)).)).))))))))….)))))).	8	-16.3		19	26									D	No	No
ENSCJAG00000004423	IER5_2	protein_coding		coding	CGGAGGAGAUGGAUACCG	AGGUAUCGCUUCUACUA	-12.19	.(((((((…((((((.&.)))))).))))).)).	8	-13.3		18	17									D	No	No
ENSCJAG00000012641	DCAKD_1	protein_coding		coding	GAGUGGAGCGUCACCA	AGGUAUCGCUUCUACUA	-14.04	.(((((((((..(((.&.)))..))).)))))).	3	-16.3		16	17									D	No	No
ENSCJAG00000012641	DCAKD_2	protein_coding		3'UTR	GGUCCCUGUGC	ACACGAGGUAUCG	-7.71	(((.((((((.&.))).))).))).	20	-8.4		11	13									D	No	No
ENSCJAG00000009307	ZBTB7B_1	protein_coding		coding	AGAUGCCUCAGGAGUGCCCUGUCUGCCACAAGAUCAU	CUGAUAAUGCUGCUUUAAUCACACACGAGGUAUCG	-11.59	.((((((((....(((........((..((..((((.&.))))..))..))........)))..)))))))).	4	-19.2		37	35									D	Yes	No
ENSCJAG00000009307	ZBTB7B_2	protein_coding		3'UTR	AGGCUGAAGCAGCACAAGG	CCUGAUAAUGCUGCUUUAAUCA	-13	.((.((((((((((…(((&)))…..)))))))))).)).	8	-16.5		19	22									D	Yes	No
ENSCJAG00000009307	ZBTB7B_3	protein_coding		3'UTR	AAGCUGAGAAGGUAU	AUACCUGAUAAUGCUG	-8.81	.(((…..((((((&))))))……))).	9	-9.2		15	16									D	Yes	No
ENSCJAG00000009307	ZBTB7B_4	protein_coding		3'UTR	ACCUCGGGUGUAAGCGA	CUGCUUUAAUCACACACGAGGU	-15.45	((((((.(((((((((.&.)))))…..)))).))))))	4	-17.1		17	22									E	Yes	No
ENSCJAG00000004153	AKT1S1	protein_coding		3'UTR	GUGGGGGAGAGAGUGAGGGGUUGGGGGACCGGCAGUUGGG	CCUGAUAAUGCUGCUUUAAUCACACACGAGGUAUCGCUUCUAC	-15.12	(((((((.((..(((…((((((((…(((((((((((&))))))..)))))))))))))…)))……)).)))))))	0	-25.2		40	43									D	Yes	No
ENSCJAG00000013198	C7ORF55-LUC7L2_1	protein_coding		coding	GAUCACCUCGUGACAGAGAUCGGAAAGAUAAGAAGC	GUUUAUUUAUACCUGAUAAUGCUGCUUUAAUCACACACGAGGUAUC	-11.38	(((.((((((((.(((..(((((....(((((((((&)))).)))))..)))))....)))...........)))))))))))	4	-19.1		36	46									D	Yes	No
ENSCJAG00000013198	C7ORF55-LUC7L2_2	protein_coding		coding+3'UTR	AGAGCGCGAAGCAGGGGAGAUCUAACUAGCUGUGU	ACAUAUUUAUUGUUUAUUUAUACCUGAUAAUGCUGCUUUA	-9.69	((((((((...((((..((((..((((((.(((((&))))).)))..))).))))...))))....))).))))).	4	-16.2		35	40									D	Yes	Yes
ENSCJAG00000007343	SPSB2_1	protein_coding		3'UTR	GGGGCCUUGCC	GGUAUCGCUUC	-7.66	(((((..((((&))))..)))))	21	-9.1		11	11									D	No	No
ENSCJAG00000007343	SPSB2_2	protein_coding		3'UTR	GGAAGAGAGCGAGC	GCUGCUUUAAUCA	-9.46	.((..(((((.(((&))))))))..)).	9	-9.1		14	13									D	Yes	No
ENSCJAG00000012438	TRIOBP	protein_coding		3'UTR	GAGUAGAGGUGGGUGCCGAGGCGUGCACCCUGCAGGC	ACCUGAUAAUGCUGCUUUAAUCACACACGAGGUAUCGCUUCUACUA	-13.15	.(((((((((((.((((((((((.(((.....((((.&.))))....)))))))))............))))))))))))))).	6	-31.8		37	46									D	Yes	No
ENSCJAG00000018049	NCOA6_1	protein_coding		3'UTR	CGGUGACGAUACUUGUAAAUGUGUGUGA	AUCACACACGAGGUAUCGCUUCUACUA	-14.56	.(((((((((((((.....(((((((((.&.)))))))))))))))))..)).))).	3	-21.8		28	27									D	No	No
ENSCJAG00000018049	NCOA6_2	protein_coding		3'UTR	UGUAGAAAUGGACCAGUGAAUAAAGAGAAUCUAAGG	CCUGAUAAUGCUGCUUUAAUCACACACGAGGUAUCGCUUCUACU	-14.82	.((((((.((((((.((((.(((((((......(((&))).......)).))))).))))......))).))).)))))).	2	-18.7		36	44									D	Yes	No
ENSCJAG00000023133	RPRM	protein_coding		3'UTR	AGCAGACAUGAUGGGGU	ACCUGAUAAUGCUGCU	-15.39	(((((.(((.((.((((&)))).)).))))))))	4	-14.9		17	16									D	Yes	No
ENSCJAG00000000811	PNRC1	protein_coding		5'UTR	GUGGCUAUUUGUUG	GAUAAUGCUGC	-5.54	(((((…(((((.&))))).)))))	1	-5.4		14	11									E	Yes	No
ENSCJAG00000001798	CPSF6	protein_coding		3'UTR	UGAAUAAAGCAAAUCUGCAUAAAUGGUA	UACCUGAUAAUGCUGCUUUAAUCA	-12.34	(((.(((((((.....((((....((((&)))).....))))))))))).)))	6	-14		28	24									D	Yes	No
ENSCJAG00000007854	ENSCJAG00000007854_1	protein_coding		coding	GCAGCUGGAGGUCAA	CUGAUAAUGCUGC	-10.43	(((((.....((((.&.))))...)))))	4	-10.5		15	13									E	Yes	No
ENSCJAG00000007854	ENSCJAG00000007854_2	protein_coding		3'UTR	AGUGAGGAGAAGCAGCAGCAGCUGGUCAGACAGGUGUGCGUGGGCUGUUUUAUGAGUU	CACUACAUAUUUAUUGUUUAUUUAUACCUGAUAAUGCUGCUUUAAUCACA	-18.17	.((((...(((((((((.............((((((((.((((((.....(((((((.&.))).))))......)))))).))))))))....)))))))))..)))).	4	-34.7		58	50									E	Yes	Yes
ENSCJAG00000004255	FAM76B	protein_coding		coding	GGUUGCAGCAUUGUCAAAGGGUAAAAAAUUUGACAAA	AUUGUUUAUUUAUACCUGAUAAUGCUGCUUUAAUCA	-19.28	((((((((((((((((...((((..((((..(((((.&.))))).)))).))))))))))))))))...)))).	4	-25.8		37	36									D	Yes	No
ENSCJAG00000020790	RHOV_1	protein_coding		3'UTR	AUGGGGCAGAUGAGGAGCAGGC	ACCUGAUAAUGCUGCUUUAA	-13.9	.((((((((........((((.&.))))......)))))))).	6	-14		22	20									E	Yes	No
ENSCJAG00000020790	RHOV_2	protein_coding		3'UTR	GGGGAGGAGCUGCAAAUUAGAGCCUGAAGCAGGAUGGAGUUGAGGA	ACCUGAUAAUGCUGCUUUAAUCACACACGAGGUAUCGCUUCUACUA	-13.57	.((.(((((((((...........((((((((.((...(((.(((.&.)))))).)).))))))))............)))..)))))).)).	13	-22.2		46	46									E	Yes	No
ENSCJAG00000014685	ABHD13	protein_coding		5'UTR	UGGGCUGGAGGAGGACGAUGAGGA	ACCUGAUAAUGCUGCUUUAAUCACAC	-11.75	((((.(((((.((....((.(((.&.))).))....)).))))).)).)).	8	-12.6		24	26									D	Yes	No
ENSCJAG00000010152	SQSTM1	protein_coding		3'UTR	AGUAAGAUCUCUUUGUAGCUAUCCUGUUAUAUUUGUUAACAAUC	UAUUGUUUAUUUAUACCUGAUAAUGCUGCUUUAAUCACACA	-8.43	.((..(((......(((((((((..((.(((..((..((((((.&.))))))))..)))))..))))..)))))....)))..)).	4	-12.3		44	41									D	Yes	No
ENSCJAG00000008938	COX17	protein_coding		coding+3'UTR	GAGAGCCCUAGGAUUUAAAAUAUGAAA	AUUUAUACCUGAUAAUGCUGCUUUA	-7.7	.(((((...((.(((.....((((((.&.))))))......))).))))))).	4	-7.6		27	25									D	Yes	No
ENSCJAG00000005608	TRAPPC10_1	protein_coding		3'UTR	AAGAUCUUUUGCAAACUGUGUUAAUGAGUGCU	UGCUGCUUUAAUCACACACGAGGUAUCGCUUCUA	-7.04	.(((…..(((....(((((….((((((.&.)).))))…..)))))….)))…..))).	9	-12.4		32	34									D	Yes	No
ENSCJAG00000005608	TRAPPC10_2	protein_coding		3'UTR	UGUGAAGCCAGAUAUACAAUGUGUGUGUUUCAAAAAGCAA	CUGCUUUAAUCACACACGAGGUAUCGCUUCUACU	-14.74	.(((((((..(((((….((((((((.((…((((((.&.)))))))).))))))))..)))))))))).)).	6	-26.1		40	34									D	Yes	No
ENSCJAG00000005608	TRAPPC10_3	protein_coding		3'UTR	UGCUCAUCAGAAAAGUACUAAAAGAGUAACUGUAA	CUACAUAUUUAUUGUUUAUUUAUACCUGAUAAUGCU	-6.26	.((..(((((....(((...(((.(((((.((((.&.))))...))))).)))...)))..)))))...)).	4	-9.7		35	36									D	Yes	Yes
ENSCJAG00000008073	NCK2_1	protein_coding		3'UTR	AGAGGGAACCGGUGACUCAGAAAGACAGAUGUUUUGGUAAUUUACCCCAAAUGUG	CAUAUUUAUUGUUUAUUUAUACCUGAUAAUGCUGCUUUAAUCACACACGAGGUAUCGCUUCU	-11.7	((((((((((.(((......((((.(((((..((.((((((..((...(((((((&)))))))...))..))...)))).))..)).))))))).......)))..))).)).)))))	4	-23.5		55	62									D	Yes	Yes
ENSCJAG00000008073	NCK2_2	protein_coding		3'UTR	AGUAUGUGAUUGGUAGUAAGAGACACAGAAUGUUUAUGAAGAAA	AUUGUUUAUUUAUACCUGAUAAUGCUGCUUUAAUCACACACG	-16.64	.((.((((((((((((((.......(((..(((..(((((.((.&.)).)))))..))).)))....)))))))..))))))).)).	7	-19.4		44	42									E	Yes	No
ENSCJAG00000002454	ENSCJAG00000002454	protein_coding		3'UTR	AGAAGCCCCUCCUC	GAGGUAUCGCUUCU	-9.57	((((((….((((&))))….))))))	6	-12.4		14	14									E	No	No
ENSCJAG00000000664	CPOX	protein_coding		3'UTR	GAUGCUGUCAGUGAUGAAUGGUGAGAUGGAAGAUUGUCAGUCAAUUGAUUAAACC	UGUUUAUUUAUACCUGAUAAUGCUGCUUUAAUCACACACGAGGUAUC	-11.75	((((((....(((.((..((((.....((.((((((((((.....(((.(((((.&.))))).)))...)))))))).)).))...)))))))))..))))))	11	-22.5		55	47									D	Yes	No
ENSCJAG00000020202	STOM_1	protein_coding		3'UTR	AGAUACUGAGAGAUUGGUGAUUUAUAUAAGGUAA	CUGCUUUAAUCACACACGAGGUAUCG	-10.56	.((((((.........(((((.....(((((((.&.))))))))))))......)))))).	8	-14.5		34	26									D	Yes	No
ENSCJAG00000020202	STOM_2	protein_coding		3'UTR	CAGAGGCAAGAACCU	AGGUAUCGCUUCUA	-9.69	.((((((..((((((&)))).)))))))).	11	-10.6		15	14									D	No	No
ENSCJAG00000020202	STOM_3	protein_coding		3'UTR	UGCCUUAUCUCCAGAGAUCCAGAGAGUC	UGCUGCUUUAAUCACACACGAGGUAUCGCU	-6.22	.((..((((((....(((..(((((((.&.))).)))).)))......))))))..)).	4	-11.4		28	30									D	Yes	No
ENSCJAG00000016632	VGLL4_1	protein_coding		3'UTR	CUGGGACAGGUCUCUUUGUCAGUGAACAAGGGCGUC	AAUGCUGCUUUAAUCACACACGAGGUAUCGCUUCUAC	-10.04	.(((((..(((..((((((..((((..((((((((.&.))))).)))...))))..)))))).)))..))))).	8	-18.8		36	37									D	Yes	No
ENSCJAG00000016632	VGLL4_2	protein_coding		3'UTR	GGCCUCGGGCAGAGGGGGCAGCAGCAGAAAACCAAACAAA	AUUGUUUAUUUAUACCUGAUAAUGCUGCUUUAAUCACACACGAGGUA	-14.35	.((((((....((.(((((((((.(((......((((((.&.))))))........)))....)))))))))..)).....)))))).	0	-25.4		40	47									D	Yes	No
ENSCJAG00000023383	HNRNPA3_1	protein_coding		coding	AGGGGGCAGUUUUGGUGGAAGAAGCUCGGGC	ACCUGAUAAUGCUGCUUUAAUCACACACGAGGUAUCGCUUCUA	-12.5	.((((((..((((((((((.((((((((((.&.))))).......)))))..)).))).)))))....)))))).	0	-20.8		31	43									D	Yes	No
ENSCJAG00000023383	HNRNPA3_2	protein_coding		3'UTR	GGAGAGAGAGCGAGGAGUUGUCAGGAAAGCUGCAGG	AUUGUUUAUUUAUACCUGAUAAUGCUGCUUUAAUCA	-15.33	.((...(((((.((..((((((((((((...((((.&.))))...)))...))))))))).)))))))..)).	7	-19.4		36	36									D	Yes	No
ENSCJAG00000009416	SUCO*	protein_coding		3'UTR	CAUUUUGUGUUGUGAUAUUUAAGUUAUUAAGCAC	AUGCUGCUUUAAUCACACACGAGGUA	-12.79	.(((((((((.(((((....((((.....((((.&.))))))))..)))))))))))))).	12	-18.2		34	26									D	Yes	No
ENSCJAG00000007530	NGDN*_1	protein_coding		coding	AGAGAAAGGACGGCG	UGCUGCUUUAAUCA	-10.2	.((..((((.((((.&.))))))))..)).	6	-9.9		15	14									D	Yes	No
ENSCJAG00000007530	NGDN_2	protein_coding		coding+3'UTR	AAGAAGAUAUCUAAGAAAGGUCAGAAGAAAAAAGGUCAGUGAACU	UGUUUAUUUAUACCUGAUAAUGCUGCUUUAAUCACACACGAGGUAUCGCUUCUA	-13.96	.(((((((((((....((((.(((........((((.(((((((.&.)))))))...)))).......)))))))...........)))))))..)))).	4	-19.3		45	54									E	Yes	No
ENSCJAG00000009828	APLP1	protein_coding		3'UTR	CAAGCCCAGACCUCC	CGAGGUAUCGCUUC	-8.84	.((((….(((((.&.)))))…)))).	4	-10.9		15	14									D	No	No
ENSCJAG00000013013	IRF1_1	protein_coding		3'UTR	GGCAUGUCAGGUCGGGGACUUGGACAG	UUGUUUAUUUAUACCUGAUAAUGCUG	-10.57	((((((((((((........((((((.&.)))))).....))))))).))))).	7	-17.7		27	26									D	Yes	No
ENSCJAG00000013013	IRF1_2	protein_coding		3'UTR	AGAGAUAGUUGCACUAAGUAAAUC	UGUUUAUUUAUACCUGAUAAUGCUGCUUUAAUCA	-6.52	.((...(((.(((.(((((((((.&.)))))))))..........))).)))....)).	7	-8		24	34									D	Yes	No
ENSCJAG00000022413	RRAGA_1	protein_coding		5'UTR	CGGCGGGGCGGAGUGCAGCGAGGC	ACCUGAUAAUGCUGCUUUAAUCACACACGAGGUAUCGCUU	-9.8	.(((((.((...(((((((((((.&.))).....))))))...........))...)).))))).	1	-16.6		24	40									D	Yes	No
ENSCJAG00000022413	RRAGA_2	protein_coding		coding	CAAAUACAGCCAUGAAGAAAAAGGUGCU	ACACUACAUAUUUAUUGUUUAUUUA	-6.42	.(((((.(((.(((((......((((..&.)))).....))))).)))))))).	1	-7.6		28	25									D	No	Yes
ENSCJAG00000018688	POLR2G	protein_coding		3'UTR	CGGAAGGUUCUUCUGUUGGCUUAGCU	UGCUUUAAUCACACACGAGGUAUCGCUUCUA	-6.09	.(((((...((((((((((...(((.&.)))....))).))).)))).....))))).	10	-13.4		26	31									D	Yes	No
ENSCJAG00000005681	CD48	protein_coding		3'UTR	UGUAAAGGAUGAGCCGUGUGCUGC	ACACUACAUAUUUAUUGUUUAUU	-8.86	.(((((.((((((..(((((.((.&.)).))))).)))))).))))).	1	-10.7		24	23									D	No	Yes
ENSCJAG00000017521	RAB7A	protein_coding		3'UTR	AGAUCUGAAGUAAGCAA	AUGCUGCUUUAAUCA	-11.49	.(((.(((((((.(((.&.))))))))))))).	13	-10.9		17	15									D	Yes	No
ENSCJAG00000017934	RGS3_1	protein_coding		3'UTR	AAAGGUCUGUGUUAUUU	UGAUAAUGCUGCUUUA	-8.75	.(((((..((((((((.&.)))))))).))))).	9	-8.5		17	16									D	Yes	No
ENSCJAG00000017934	RGS3_2	protein_coding		3'UTR	GAGUCGAAGGACGGGCCCCGUA	CACGAGGUAUCGCUUCUACUA	-7.65	.(((.((((((...(((.(((.&.))).))).)).)))).))).	3	-13.6		22	21									D	No	No
ENSCJAG00000017934	RGS3_3	protein_coding		3'UTR	CAGAGGCUUUGCAUUGAC	ACGAGGUAUCGCUUCUA	-8.3	.((((((..(((.(((..&.))).)))..)))))).	1	-11.9		18	17									D	No	No
ENSCJAG00000017934	RGS3_4	protein_coding		3'UTR	UAGUAGUCGGAUGCUUGGCACGUUGUCCUGUAA	AUACCUGAUAAUGCUGCUUUAAUCACACACGAGGUAUCGCUUCUACUA	-15.05	((((((...((((((((((((((((((..(((.&.)))..))))))).)))).............)))))))....))))))	0	-23.7		33	48									D	Yes	No
ENSCJAG00000016303	ENSCJAG00000016303	protein_coding		coding	CAGUCCAACGAGAUCACCAUCCCUGUCACCUUCGAGUCGC	GCUGCUUUAAUCACACACGAGGUAUCGCUUCUACUA	-5.93	.(((.......(((.(((.((..(((.......((((.((&)).)))).......))).))))))))......))).	4	-9.7		40	36									D	Yes	No
ENSCJAG00000016069	KLF10_1	protein_coding		coding	GAGAAGAAAUUUGCAUGCCCCAUGUGUGACCGGCGGUUCAUGAGGAGUGAC	UUUAUACCUGAUAAUGCUGCUUUAAUCACACACGAGGUAUCGCUUCUACUA	-17.21	.((.((((....(((((((...(((((((..((((((..((.(((.((((.&.)))).))).))...))))))....)))))))...))))).)))))).)).	2	-31.4		51	51									D	Yes	No
ENSCJAG00000016069	KLF10_2	protein_coding		3'UTR	CAGUGACACACCAGAAAGUGAAGAGUCAGA	GCUGCUUUAAUCACACACGAGGUAUCGCUU	-8.99	.(((((...(((.....((((((((.(((.&.)))))))..))))......))).))))).	7	-15		30	30									D	Yes	No
ENSCJAG00000005346	PDXDC1	protein_coding		3'UTR	AAGAGGAAGUGAUACUGGAAAUGUGAACUGUGCCACAU	AAUGCUGCUUUAAUCACACACGAGGUAUCGCUUCUACUA	-19.03	.((.((((((((((((.....(((((.....((..(((.&.)))..)).....))))).....)))))))))))).)).	9	-25.9		38	39									D	Yes	No
ENSCJAG00000003638	GTF2H5	protein_coding		3'UTR	AGGAGCAUGCCACAGGAAAGACCAAGGGAUCAUUUGUUCAGA	CCUGAUAAUGCUGCUUUAAUCACACACGAGGUAUCGCUUCUA	-11.05	(((((((((((........((..((((...((((...((((.&.)))).))))...))))..))........))))).)))))).	2	-20.7		42	42									E	Yes	No
ENSCJAG00000001557	C1orf216	protein_coding		3'UTR	AUGGGAGAGAGCCGUCGUGUGUGCAGGGGUGCAU	AUGCUGCUUUAAUCACACACGAGGUAUCGCUUCUAC	-21.66	.((((((.(((((.(((((((((..(((((((((&)))).)))))...)))))))))))).)).)))))).	7	-31.1		34	36									D	Yes	No
ENSCJAG00000019702	MAX_1	protein_coding		coding	AGUCUGAGCCUGAAGAGCCCCAAAGCAGGA	ACCUGAUAAUGCUGCUUUAAUCACACA	-9.49	.((.(((...((((((((.......((((.&.)))).....))).))))).))).)).	2	-13.4		30	27									D	Yes	No
ENSCJAG00000019702	MAX_2	protein_coding		3'UTR	GAGGGCUGCGUGGAUUCUUGUG	UACCUGAUAAUGCUGCUUUA	-9.73	.(((((.((((....((..(((&)))..))..)))).))))).	0	-10.5		22	20									D	Yes	No
ENSCJAG00000019702	MAX_3	protein_coding		3'UTR	AGAGGUUUUGUAUUGAGGGCCAGUGAUGAUGA	ACAUAUUUAUUGUUUAUUUAUACCUGAUAAUGCUGCUUUA	-8.48	.(((((...((((((.(((.((((((..(((.&.)))..))))))..........)))..)))))).))))).	0	-15		32	40									D	Yes	Yes
ENSCJAG00000003247	IP6K2_1	protein_coding		coding	GGCGCCAGCUCUGUAGACGUGCGCAUGAUCGA	CUGAUAAUGCUGCUUUAAUCACACACGAGGUAUCGCUU	-8.19	((((....((((((.((...((((((.((((.&.)))).)))).)).....))..))).)))....)))).	0	-17.1		32	38									D	Yes	No
ENSCJAG00000003247	IP6K2_2	protein_coding		coding+3'UTR	AGUGAGGAGAGUGGGGAGUGAGCU	UGUUUAUUUAUACCUGAUAAUGCUGCUUUAAUCACA	-14.97	.((((..((((((((((((((((.&.))))))))...))).........)))))..)))).	5	-15.8		24	36									D	Yes	No
ENSCJAG00000005740	CASP3_1	protein_coding		3'UTR	AGAUCUGAAGAGCUAUUGUAUAAG	UUUAUACCUGAUAAUGCUGCUUUAAUCA	-11.74	.(((.(((((((((((((((((((&)))))))..))))..))).)))))))).	4	-11.8		24	28									D	Yes	No
ENSCJAG00000005740	CASP3_2	protein_coding		3'UTR	GAGGAAGCUAGGUUGACUCUCAAGGC	ACCUGAUAAUGCUGCUUUAAUCA	-6.29	((.(((((...((((....(((.((.&.)))))))))...)))))..)).	5	-9.9		26	23									D	Yes	No
ENSCJAG00000004804	CBLB	protein_coding		3'UTR	UAGCAGCCAGAACAGUAAACAC	UUGUUUAUUUAUACCUGAUAAUGCUGCUU	-14.06	.(((((((((...((((((((.&.)))))))).....))).....)))))).	1	-14.6		22	29									D	Yes	No
ENSCJAG00000018984	ENSCJAG00000018984	protein_coding		3'UTR	AGGAAGGAAGGCGUCGUGG	ACACGAGGUAUCGCUUCUA	-14.73	.(((((((..((.(((((.&.))))).)).)).))))).	7	-17.8		19	19									D	No	No
ENSCJAG00000019735	KCMF1	protein_coding		coding	UCAGACGAGGAUGAUCGGGGGGAGAUGGCAGAUUUUGGUGC	ACACUACAUAUUUAUUGUUUAUUUAUACCUGAUAAUGCUGCUUUA	-13.31	..(((..((.((.((((((...(((((((((((..(((((.&.)))))...)))...)).))))))...)))))).)).))..))).	4	-17.5		41	45									D	Yes	Yes
ENSCJAG00000021101	AVEN_1	protein_coding		coding	UAGAUGCACCUA	GAGGUAUCGCUUCUA	-5.51	((((.((((((.&.))))...)).))))	6	-8.3		12	15									E	No	No
ENSCJAG00000021101	AVEN_2	protein_coding		coding	CUGGUUGGACAGCAU	AUGCUGCUUUAAUCAC	-12.16	.((((((((((((((&)))))).)))))))).	10	-13.5		15	16									D	Yes	No
ENSCJAG00000005126	RASSF1	protein_coding		coding	AGAAGUAUUCCUAUUGCCGCCAGAAGAUCCAAGAGGCC	UGCUGCUUUAAUCACACACGAGGUAUCGCUUCU	-6.88	((((((........((((.......(((..(((.(((.&.))).)))..)))........))))..))))))	4	-12.9		38	33									D	Yes	No
ENSCJAG00000002653	PRDM16_1	protein_coding		3'UTR	CGGAGCUGCAUCGAAGA	CCUGAUAAUGCUGCUUUA	-10.31	((((.((((...((.&.))....)))).))))).	5	-10.2		17	18									D	Yes	No
ENSCJAG00000002653	PRDM16_2	protein_coding		3'UTR	UGGCCGGGUGCCUACGUGGGGCCUCGGAAGGGAAUGGAUAGACGGG	AUUGUUUAUUUAUACCUGAUAAUGCUGCUUUAAUCACACACGAGGUAUCGCUU	-12.08	.(((..(((((((.((((((((..((...(((.((((((((((((.&.)))))))))))).))).....))..))))........)))))))))))))).	0	-30.4		46	53									D	Yes	No
ENSCJAG00000017657	MGEA5_1	protein_coding		3'UTR	UGCAGUUUUGCAUCAGCUGUUUAACU	UGUUUAUUUAUACCUGAUAAUGCUGCU	-8.21	.(((((.....(((((.(((..(((.&.))).....))).)))))...))))).	3	-12		26	27									E	Yes	No
ENSCJAG00000017657	MGEA5_2	protein_coding		3'UTR	GGGUUUAUACAGGGAGAGACUUCAAUAAAU	AUUUAUUGUUUAUUUAUACCUGAUAAUGCUG	-9.92	.(((((((.((((...(((...((((((((&))))))))....)))...)))))))).))).	9	-13		30	31									D	Yes	No
ENSCJAG00000037004	FDX1L	protein_coding		3'UTR	CUGAGAAUCGGUGUGAAUAGGAGUGGACUCAGA	CCUGAUAAUGCUGCUUUAAUCACACACGAGGUAUCGC	-15.24	.(((...(((((((((..((.((((...((((.&.))))...)))).))....)))))).)))....))).	6	-22.6		33	37									D	Yes	No
ENSCJAG00000007090	MITD1	protein_coding		coding	AUGGAUGAUUAAGAUUGGAAGGGGGCU	UGCUGCUUUAAUCACACAC	-12	.((..(((((((........((.(((.&.))).)))))))))..)).	0	-11.4		27	19									D	Yes	No
ENSCJAG00000021374	CDYL	protein_coding		3'UTR	CGCUAUUUAUUAUCGGGGAGUUUUUAAAGUACUGUAA	CUACAUAUUUAUUGUUUAUUUAUACCUGAUAAUGCUGCU	-13.12	.((....((((((((((((((.....(((((.((((.&.))))))))).......))))...))))))))))..)).	3	-14.5		37	39									D	Yes	Yes
ENSCJAG00000008013	CNIH4	protein_coding		3'UTR	AGUGCACAGAUGAGGAGCCAGA	CCUGAUAAUGCUGCUUUAAUCACACACG	-10.61	.(((....((((((.((((((.&.))).....))).)))..)))...))).	4	-10.6		22	28									D	Yes	No
ENSCJAG00000006277	CYB5R1	protein_coding		coding	AGAAAUCUCCACCAGAACCCCGAGUGGCGAAGAAACUGGGAAUGAU	UUUAUACCUGAUAAUGCUGCUUUAAUCACACACGAGGUAUCG	-4.48	.((.(((((............((((((((........(((.((((.&.)))).))).....))))))))...........))))).)).	12	-14.9		46	42									D	Yes	No
ENSCJAG00000006947	SPCS1	protein_coding		coding+3'UTR	AAGAGGCAUGCUAAAAAUAAUUGAGGUUUUCAUUAUUCAGC	CCUGAUAAUGCUGCUUUAAUCACACACGAGGUAUCGCUUCUA	-15.8	.(((((((((((.......((((((((...((((((.(((.&.)))))))))..)))))))).........))))).)))))).	0	-22.9		41	42									D	Yes	No
ENSCJAG00000000769	AKIRIN2	protein_coding		coding	ACAGACAGAUCC	UGAUAAUGCUGC	-4.95	.(((.((.(((.&.)))..))))).	0	-4.6		12	12									D	Yes	No
ENSCJAG00000004749	SMAD7_1	protein_coding		3'UTR	CGGUAGCCGCGUGCAGAGGGGACAGAGCGUGCGCUGAGCAGG	CCUGAUAAUGCUGCUUUAAUCACACACGAGGUAUCG	-12.17	(((((.((.((((.....((...((((((.(((.....((((&))))....)))))))))..))...)))).)))))))	4	-23.4		42	36									E	Yes	No
ENSCJAG00000004749	SMAD7_2	protein_coding		3'UTR	AUGGGGAGGCGACGUGCUCU	CGAGGUAUCGCUUCUACUAA	-9.79	.(((((((((((....(((.&.)))...)))))))).))).	4	-15.9		20	20									D	No	No
ENSCJAG00000009991	DIDO1	protein_coding		coding	CUGGUGCCUCGAAAUGUAUCGGCCCCGGGUGC	AUACCUGAUAAUGCUGCUUUAAUCACACACGAGGUAUCGC	-9.75	.((((((((((...(((((((((..((((((.&.)))))).....)))).....)).)))..)))))))))).	0	-22.3		32	40									D	Yes	No
ENSCJAG00000006210	SH2B1	protein_coding		3'UTR	CGUGGUUGAGCUGGUCCCCGUGGUUGAAUUGGAAGAGGCC	UGCUGCUUUAAUCACACACGAGGUAUCGCUUCUACU	-18.21	.((((..((((.(((((.((((..(((....((((.(((.&.))).))))..)))..)))).)).))))))))))).	0	-25.7		40	36									E	Yes	No
ENSCJAG00000011876	BRAP	protein_coding		coding	CUGGAGACACAGCAGAAGAUCAA	CUGAUAAUGCUGCUUUAA	-9.59	.(((((...(((((....((((.&.))))..)))))))))).	4	-11.1		23	18									D	Yes	No
ENSCJAG00000008790	CGGBP1_1	protein_coding		coding	UGGAGGCUCCAUACCUAAGUCUGACCAGCUACGGAGAGCUUAUCUGCCUGAUGGAU	UGUUUAUUUAUACCUGAUAAUGCUGCUUUAAUCACACACGAGGUAUCGCUUCUA	-10.53	(((((((...((((((..((.(((..(((.......((((((((.....(((((((&.))))))).......))))).))))))....))).))...)))))).)))))))	3	-24.2		56	54									D	Yes	No
ENSCJAG00000008790	CGGBP1_2	protein_coding		coding	AGAGAAAGUCAGUGUUAUCCAGGACUUUGUGAAA	GUUUAUUUAUACCUGAUAAUGCUGCUUUAAUCA	-15.42	.((.((((.((((((((((.(((.....(((((.&.))))).....)))))))))))))))))..)).	1	-20.2		34	33									D	Yes	No
ENSCJAG00000012537	CBX7	protein_coding		3'UTR	UGUGUGUGCUGGGAGAGUCAGAGUGGAUGUAGAGCGCGGUU	UAUUGUUUAUUUAUACCUGAUAAUGCUGCUUUAAUCACACACG	-14.08	.(((((((...(((((((......((.((((((..(((((.&.)))))...)))))))).......))).))))...))))))).	5	-22.2		41	43									E	Yes	No
ENSCJAG00000020068	ENSCJAG00000020068	protein_coding		coding	CAUUGGAAUGGCCAAAAGGGAGAUAAACAAA	AUUGUUUAUUUAUACCUGAUAAUGCUGCUUUAAUC	-12.1	.((((((.((((....(((.((((((((((.&.))))))))))...)))......)))).)))))).	4	-14.7		31	35									D	Yes	No
ENSCJAG00000012796	TMEM120A_1	protein_coding		coding	AGUUGACCAAGCUGCAG	AUGCUGCUUUAAUCACACA	-8.43	.(((((..((((.(((.&.))).))))...))).)).	0	-9		17	19									D	Yes	No
ENSCJAG00000012796	TMEM120A_2	protein_coding		coding	AAAAGAGCGUCAAGGC	ACCUGAUAAUGCUGCUUUA	-9.88	.(((((((((..(((.&.)))....))))).)))).	11	-10.1		16	19									D	Yes	No
ENSCJAG00000012289	SARAF_1	protein_coding		coding	AGUCUGGAAAGCAGCAUGGUUU	UACCUGAUAAUGCUGCUUUAAUCACACA	-14.94	.((.((((((((((((((((..&.))).....))))))))))..))).)).	3	-16.6		22	28									D	Yes	No
ENSCJAG00000012289	SARAF_2	protein_coding		3'UTR	CGAUAAAGUAGAAAGUUGGAGUCAAACACUGGAUGC	AUAUUUAUUGUUUAUUUAUACCUGAUAAUGCUGCUUUAAUCA	-11.44	.((((((((((...(((((.((.(((((.((((((.&.)))))).)))))......)))))))....))))))).))).	7	-14.2		36	42									E	Yes	No
ENSCJAG00000021620	ATF7IP	protein_coding		3'UTR	AAUCUUGUGCAUGAUACCCCACGUAAAAUCC	UGAUAAUGCUGCUUUAAUCACACACGAGGUA	-11.73	.((((((((..((((....((.(((..(((.&.)))..))))).....))))..)))))))).	2	-14.1		31	31									D	Yes	No
ENSCJAG00000004657	TIPARP	protein_coding		coding	AGCAUGCUACAAUGUUUGGACAAGGCAGUU	UGCUGCUUUAAUCACACACGAGGUAUCGCUU	-11.98	((((((((....(((.(((..((((((((.&.))))))))..))).)))...))))).))).	0	-18.2		30	31									D	Yes	No
ENSCJAG00000020688	MGA	protein_coding		3'UTR	AAGAAGCAUGAUCUCGGUA	CACACGAGGUAUCGCUUCUA	-14.17	.((((((...((((((((.&.)).))))))...)))))).	0	-17.2		19	20		AACAACGAUGAGGUGCCUA	CAGAGCACUUAUCCGUUGUA	.((((((...((((((((.&.)).))))))...)))))).	-16.41	-16.6			D	No	No
ENSCJAG00000012711	MED28	protein_coding		3'UTR	UAGUGGGAACAGUGAUACG	GGUAUCGCUUCUACUA	-14.68	(((((((...((((((((.&.)))))))))))))))	6	-16		19	16									D	No	No
ENSCJAG00000011804	TBRG4	protein_coding		3'UTR	UGUGGGACCUUGGCCAGAGUGGGGAGGGCGGCCAGCAGCUCUGAGGAAC	GUUUAUUUAUACCUGAUAAUGCUGCUUUAAUCACACACGAGGUAUCGCU	-13.25	.((((.((((((......((((..((((((((...(((...(((.((((&))))..)))...))).....))))))))..))))...)))))).)))).	3	-28.6		49	49									D	Yes	No
ENSCJAG00000014865	SNRPA	protein_coding		coding	UGAAGAUCUCCUUUGCCAAGAAGUAGCA	UGCUGCUUUAAUCACACACGAGGUAUCGCUUCU	-12.66	.((((....((((((....(((((((((&))))))))).....))...)))).....)))).	11	-16.7		28	33									D	Yes	No
ENSCJAG00000014207	NAXD	protein_coding		3'UTR	GGGAGAGCGUGUGUGACGGCAAAAUCGGA	CCUGAUAAUGCUGCUUUAAUCACACACGAGGUAUCGCUUCUA	-19.72	(((((..((((((((((((((..(((((.&.)))))..)))))......)))))))))........))))).	3	-26.7		29	42									D	Yes	No
ENSCJAG00000011890	GATD1	protein_coding		3'UTR	AGAGCGAAACUUAUCUCGA	ACGAGGUAUCGCUUC	-11.72	.((((((....(((((((.&.))))))))))))).	8	-15.3		19	15									E	No	No
ENSCJAG00000009561	PRC1_1	protein_coding		3'UTR	UCAGCAUUUGUCCCUGGC	ACCUGAUAAUGCUGC	-11.23	.(((((((.(((...((.&.)).)))))))))).	1	-11.2		18	15									D	Yes	No
ENSCJAG00000009561	PRC1_2	protein_coding		3'UTR	UGGAACUUUGCACAUGUCACUACGGGGGAGUU	UAUUUAUACCUGAUAAUGCUGCUUUAAUCACAC	-7.64	((((.....((((((((((....((..((((.&.))))...)))))).))).))).....)).)).	2	-8.4		32	33									D	Yes	No
ENSCJAG00000017987	CSNK1D_1	protein_coding		3'UTR	GGGAGUCCCAGGAUUAAAGGUGGAAGAUGC	UUAUUUAUACCUGAUAAUGCUGCUUUA	-11.35	.((((...(((.((((.(((((..(((((.&.))))).)))))..)))).))))))).	1	-13.7		30	27									D	Yes	No
ENSCJAG00000017987	CSNK1D_2	protein_coding		3'UTR	CGAGGCCCUCAGAGAGCAGUUAGGGACUGCAGGC	ACCUGAUAAUGCUGCUUUAAUCACACACGAGGUAUCGCUUCU	-10.89	.(((((((((..((((((((.........((((.&.)))).....))))))))..........))))....))))).	3	-22.5		34	42									D	Yes	No
ENSCJAG00000004141	SLC4A7	protein_coding		3'UTR	AUAGAAUUGAACCAAGAGGCAUUAUACAUAUAGAUAC	UUAUUUAUACCUGAUAAUGCUGCUUUAAUCACACACGAGGUAUCGCUUCUAC	-16.05	.(((((.(((((((((.((((((((.((((((((((.&.))))))))..)))))))))).))).............))).))).))))).	0	-20.6		37	52									D	Yes	No
ENSCJAG00000006503	ENSCJAG00000006503	protein_coding		3'UTR	AGUGAUUGGAAAGAGCUUUAGG	CCUGAUAAUGCUGCUUUAAUCACA	-14.2	.(((((((((...(((.(((((&)))))....)))..))))))))).	3	-14.3		22	24									D	Yes	No
ENSCJAG00000007331	PRKACB	protein_coding		3'UTR	CAGUGAUUGCACUCUGUUGAGAGAUAAGGUAGA	GCUGCUUUAAUCACACACGAGGUAUCGCUU	-14.94	.((((((.((.(((((.((.((..((((((((.&.)))))))).)).)))).))))))))))).	1	-20.8		33	30									E	Yes	No
* HSUR2 target mRNAs previously identified in C. Gorbea, T. Mosbruger, D. Cazalla, Nature 550, 275-279 (2017) are highlighted in red
			% of total					% of total
	5'UTR	3	1.7			No. of target binding sites that use the miR-16 binding site to base-pair with HSUR2	139	81.3
	CDS	44	25.6			No. of target binding sites that do not use the miR-16 binding site to base-pair with HSUR2	32	18.7
	CDS+3'UTR	9	5.8			Total	171	100
	3'UTR	115	66.9
	Total	171	100			No. of target binding sites that use the miR-142-3p binding site to base-pair with HSUR2	15	8.8
						No. of target binding sites that do not use the miR-142-3p binding site to base-pair with HSUR2	156	91.2
			% of total targets			Total	171	100
	1 BS	64	58.2
	2 BS	34	30.9			No. of target binding sites that use both miRNA binding sites to base-pair with HSUR2	11	6.4
	3 BS	9	8.2			No. of target binding sites that do not use a miRNA binding site to base-pair with HSUR2	28	16.4
	4 BS	2	1.8			No. of target binding sites that use the miR-142-3p binding site only to base-pair with HSUR2	4	2.3
	5 BS	1	0.9			Total	43	25.1
	Total	110	100
	Distance to closest yuxtaposed pyrimidine	# of targets	Frequency
	0	25	0.146199
	1-5	85	0.497076
	6-10	42	0.245614
	≥11	19	0.111111
	Total	171	1
	Position of HSUR2 binding sites	# of targets	Frequency
	At sharp drop of reads	143	0.836257
	At edge of peaks	28	0.163743
	Total	171	1
