# Supplementary material for: Viral miRNA adaptor differentially recruits miRNAs to target mRNAs through alternative base-pairing
Source: eLife. 2019 Sep 20;8:e50530. doi: 10.7554/eLife.50530 (PMC6763288; doi:10.7554/eLife.50530)
Supplement: Supplementary file 3. [file elife-50530-supp3.xlsx]

## Sheet: Sheet1
		LIST OF OLIGONUCLEOTIDES USED IN THIS STUDY
GENE	PRIMER NAME	SEQUENCE	USED IN
Ricosomal RNA	18S_F	5'-GCAATTATTCCCCATGAACG-3'	qPCR
Ricosomal RNA	18S_R	5'-GGCCTCACTAAACCATCCAA-3'	qPCR
β-Actin	ACTB_F	5'-TTCAACACCCCAGCCATGTA-3'	qPCR
b-Actin	ACTB_R	5'-TCACCGGAGTCCATCACGAT-3'	qPCR
BCCIP	BCCIP_F	5'-AGCGATGATGATGTGGATGA-3'	qPCR
BCCIP	BCCIP_R	5'-TTCACTTAGGAGAAGGCCCA-3'	qPCR
NGDN	NGDN_F	5'-AGCCTCATCCCAGCAATATG-3'	qPCR
NGDN	NGDN_R	5'-CTCAATGCCCGTCTCTTAGC-3'	qPCR
RB1	RB1_Cj_F2	5'-TGGACTTCCAGAGGTTGAAAGT-3'	qPCR
RB1	RB1_Cj_R2	5'-TCGTGGTGTTCTCTGTGCTT-3'	qPCR
YTHDC1	YTHDC1_Cj_F	5'-CCTTCACAGATGGGTCCGTC-3'	qPCR
YTHDC1	YTHDC1_Cj_R	5'-TCTGATGCAGAGCTTCCACT-3'	qPCR
TP53RK	TP53RK_Cj_F	5'-ACCGCTTCCCCAAGGGTTA-3'	qPCR
TP53RK	TP53RK_Cj_R	5'-AACTGGGGCAGATATTCCCG-3'	qPCR
PACS1	PACS1_F3	5'-ATTCCCTTCATTGGCGTGGT-3'	qPCR
PACS1	PACS1_R3	5'-GTGATGTGGAGGGCACAGTA-3'	qPCR
HNRNPA2B1	HNRNPA2B1_F1	5'-TCCATGGCTGAGGTTGATGC-3'	qPCR
HNRNPA2B1	HNRNPA2B1_Cj_R1	5'-ACGTGAGCCCCTGGTTTTCC-3'	qPCR
STK4	STK4_Cj_F	5'-CTCCTGCAGCACCCATTTGT-3'	qPCR
STK4	STK4_Cj_R	5'-GGGATTCCTGGCGTTTCAGT-3'	qPCR
CD69	CD69_Cj_F2	5'-ACAACGTGAAGGGTTCTTCCA-3'	qPCR
CD69	CD69_Cj_R2	5'-GCTGTCTGATGGCACTGAGA-3'	qPCR
MGA	MGA_Cj_F7	5'-CAGATTAGTTTGCGGCAGGC-3'	qPCR
MGA	MGA_Cj_R7	5'-GCACAGTCTTCCAGGTCCAT-3'	qPCR
HSUR2	HSUR2NOR1	5'-AGCGATACCTCGTGTGTGATTAAAGCAGCA-3'	Northern blot
HSUR2	HSUR2NOR3	5'-TTTAAATATGTACACCCAGCGCTTTCAAAA-3'	Northern blot
HSUR7	HSUR7NOR	5'-CCTAAGTACCTAGTGCCTCCAAAAATTTAT-3'	Northern blot
U6	U6NOR	5'-GCAGGGGCCATGCTAATCTTCTCTGTATCG-3'	Northern blot
HSUR2	H2THIOMET	5'-mA*mA*mG*mC*mG*A*T*A*C*C*T*C*G*T*G*mU*mG*mU*mG*mA-3'	Knockdown of HSUR2
HSUR2	anti-HSUR2	5'-CAGCGCTGGTTTTTAAATATGTACACCCAGCGCTTTCAAAAATTAGTAGAAGCGATACCTCGTGTGTGATTAAAGCAGCATTATCAGGTATAAATAAACAATAAATATGTAGTGT-3'	S1 protection & RNase H digestion
HSUR2	b-antiH2rASO	5'-/52-Bio/TAATrGrUrArGrArArGrCrGrArUrArCrCrUrCrGrUrGrUrGrUrGrArUrUrArArArGrCrArGrCrArUrUrArUrCrArGrG/3SpC3/-3'	HSUR2 purification
