# Supplementary material for: Viral miRNA adaptor differentially recruits miRNAs to target mRNAs through alternative base-pairing
Source: eLife. 2019 Sep 20;8:e50530. doi: 10.7554/eLife.50530 (PMC6763288; doi:10.7554/eLife.50530)
Supplement: Supplementary file 4. [file elife-50530-supp4.xlsx]

## Sheet: enrichment_All_GOrilla
GO Term	Description	P-value	-LOG(P-value)	Enrichment	Total No. of genes	No. of genes associated with GO term	No. of input genes analyzed	No. of genes in intersection	Genes
GO:0010605	negative regulation of macromolecule metabolic process	2.2e-05	4.65758	2.09	13902	2063	103	32	DDIT4, GFI1, AKT1S1, MGA, HMGB2, NCK2, CDYL, SQSTM1, CBX7, ZBTB7B, ZFP36L1, ATF7IP, CASP3, H3F3B, ARL6IP1, CBLB, PRDM16, HNRNPA2B1, AKIRIN2, CGGBP1, VGLL4, MAX, CDKN2D, TIPARP, HSPB1, KDM2A, IRF1, RGS3, POLR2G, KLF10, SMAD7, PRDX3
GO:0051172	negative regulation of nitrogen compound metabolic process	2.58e-05	4.58838	2.15	13902	1881	103	30	DDIT4, GFI1, AKT1S1, MGA, HMGB2, NCK2, CDYL, SQSTM1, CBX7, ZBTB7B, ZFP36L1, ATF7IP, CASP3, H3F3B, ARL6IP1, CBLB, PRDM16, HNRNPA2B1, AKIRIN2, CGGBP1, VGLL4, MAX, CDKN2D, HSPB1, KDM2A, IRF1, RGS3, KLF10, SMAD7, PRDX3
GO:1903507	negative regulation of nucleic acid-templated transcription	2.81e-05	4.55129	2.76	13902	979	103	20	GFI1, MGA, PRDM16, HNRNPA2B1, AKIRIN2, CGGBP1, VGLL4, HMGB2, NCK2, MAX, SQSTM1, CDYL, CBX7, KDM2A, IRF1, ZBTB7B, KLF10, ATF7IP, SMAD7, H3F3B
GO:1902679	negative regulation of RNA biosynthetic process	2.89e-05	4.5391	2.75	13902	981	103	20	GFI1, MGA, PRDM16, HNRNPA2B1, AKIRIN2, CGGBP1, VGLL4, HMGB2, NCK2, MAX, SQSTM1, CDYL, CBX7, KDM2A, IRF1, ZBTB7B, KLF10, ATF7IP, SMAD7, H3F3B
GO:0031324	negative regulation of cellular metabolic process	3.13e-05	4.50446	2.09	13902	1999	103	31	DDIT4, GFI1, AKT1S1, MGA, HMGB2, NCK2, CDYL, SQSTM1, CBX7, RRAGA, ZBTB7B, ZFP36L1, ATF7IP, CASP3, H3F3B, ARL6IP1, CBLB, PRDM16, HNRNPA2B1, AKIRIN2, CGGBP1, VGLL4, MAX, CDKN2D, HSPB1, KDM2A, IRF1, RGS3, KLF10, SMAD7, PRDX3
GO:0009892	negative regulation of metabolic process	4.86e-05	4.31336	1.98	13902	2248	103	33	DDIT4, GFI1, AKT1S1, MGA, HMGB2, NCK2, CDYL, SQSTM1, CBX7, RRAGA, ZBTB7B, ZFP36L1, ATF7IP, CASP3, H3F3B, ARL6IP1, CBLB, PRDM16, HNRNPA2B1, AKIRIN2, CGGBP1, VGLL4, MAX, CDKN2D, TIPARP, HSPB1, KDM2A, IRF1, RGS3, POLR2G, KLF10, SMAD7, PRDX3
GO:0045892	negative regulation of transcription, DNA-templated	5.8e-05	4.23657	2.71	13902	946	103	19	GFI1, MGA, PRDM16, HNRNPA2B1, AKIRIN2, CGGBP1, VGLL4, HMGB2, NCK2, MAX, SQSTM1, CBX7, KDM2A, IRF1, ZBTB7B, KLF10, ATF7IP, SMAD7, H3F3B
GO:0031327	negative regulation of cellular biosynthetic process	6.19e-05	4.20831	2.45	13902	1210	103	22	GFI1, DDIT4, MGA, PRDM16, HNRNPA2B1, AKIRIN2, CGGBP1, VGLL4, MAX, HMGB2, NCK2, CDYL, SQSTM1, CBX7, KDM2A, IRF1, ZBTB7B, ZFP36L1, KLF10, ATF7IP, SMAD7, H3F3B
GO:0051253	negative regulation of RNA metabolic process	7.34e-05	4.1343	2.58	13902	1048	103	20	GFI1, MGA, PRDM16, HNRNPA2B1, AKIRIN2, CGGBP1, VGLL4, HMGB2, NCK2, MAX, SQSTM1, CDYL, CBX7, KDM2A, IRF1, ZBTB7B, KLF10, ATF7IP, SMAD7, H3F3B
GO:0009890	negative regulation of biosynthetic process	8e-05	4.09691	2.41	13902	1231	103	22	GFI1, DDIT4, MGA, PRDM16, HNRNPA2B1, AKIRIN2, CGGBP1, VGLL4, MAX, HMGB2, NCK2, CDYL, SQSTM1, CBX7, KDM2A, IRF1, ZBTB7B, ZFP36L1, KLF10, ATF7IP, SMAD7, H3F3B
GO:0045934	negative regulation of nucleobase-containing compound metabolic process	9.89e-05	4.0048	2.45	13902	1159	103	21	GFI1, DDIT4, MGA, PRDM16, HNRNPA2B1, AKIRIN2, CGGBP1, VGLL4, MAX, HMGB2, NCK2, SQSTM1,CDYL, CBX7, KDM2A, IRF1, ZBTB7B, KLF10, ATF7IP, SMAD7, H3F3B
GO:0010558	negative regulation of macromolecule biosynthetic process	0.000103	3.98716	2.44	13902	1162	103	21	GFI1, MGA, PRDM16, HNRNPA2B1, AKIRIN2, CGGBP1, VGLL4, MAX, HMGB2, NCK2, SQSTM1, CDYL, CBX7, KDM2A, IRF1, ZBTB7B, ZFP36L1, KLF10, ATF7IP, SMAD7, H3F3B
GO:2000113	negative regulation of cellular macromolecule biosynthetic process	0.000153	3.81531	2.44	13902	1106	103	20	GFI1, MGA, PRDM16, HNRNPA2B1, AKIRIN2, CGGBP1, VGLL4, HMGB2, NCK2, MAX, SQSTM1, CBX7, KDM2A, IRF1, ZBTB7B, KLF10, ATF7IP, SMAD7, H3F3B
GO:0048523	negative regulation of cellular process	0.000181	3.74232	1.62	13902	3750	103	45	DDIT4, GFI1, AKT1S1, MGA, RASSF1, PRKACB, RPRM, NCK2, APLP1, HMGB2, CDYL, SQSTM1, MYH9, IP6K2, CBX7, RRAGA, ZBTB7B, ZFP36L1, MED28, AVEN, ATF7IP, CASP3, H3F3B, BRAP, ARL6IP1, CBLB, PRDM16, RAB7A, HNRNPA2B1, MID1IP1, AKIRIN2, CGGBP1, VGLL4, MAX, CDKN2D, HSPB1, KDM2A, TRIOBP, IRF1, RGS3, TBRG4, KLF10, SMAD7, STK4, PRDX3
GO:0006915	apoptotic process	0.000186	3.73049	3.23	13902	544	103	13	ARL6IP1, DDIT4, APLP1, MAX, SQSTM1, IRF1, RRAGA, ZFP36L1, POLR2G, AVEN, CASP3, PRDX3, STK4
GO:0006397	mRNA processing	0.000211	3.67572	3.97	13902	340	103	10	HNRNPA3, GTF2H5, HNRNPA2B1, ZFP36L1, TBRG4, POLR2G, CPSF6, SNRPA, SNIP1, POLR2A
GO:0048519	negative regulation of biological process	0.00022	3.65758	1.57	13902	4138	103	48	DDIT4, GFI1, AKT1S1, PRKACB, MGA, RASSF1, RPRM, NCK2, APLP1, HMGB2, CDYL, SQSTM1, MYH9, IP6K2, CBX7, ISCU, RRAGA, ZBTB7B, ZFP36L1, MED28, AVEN, ATF7IP, CASP3, H3F3B, BRAP, ARL6IP1, CBLB, PRDM16, RAB7A, HNRNPA2B1, MID1IP1, AKIRIN2, CGGBP1, VGLL4, MAX, CDKN2D, TIPARP, HSPB1, KDM2A, TRIOBP, IRF1, RGS3, TBRG4, POLR2G, KLF10, SMAD7, STK4, PRDX3
GO:0012501	programmed cell death	0.000235	3.62893	2.98	13902	634	103	14	ARL6IP1, DDIT4, APLP1, MAX, SQSTM1, CDKN2D, IRF1, RRAGA, ZFP36L1, POLR2G, AVEN, CASP3, PRDX3, STK4
GO:0048011	neurotrophin TRK receptor signaling pathway	0.000249	3.6038	23.82	13902	17	103	3	DDIT4, AKT1S1, CASP3
GO:0010629	negative regulation of gene expression	0.000282	3.54975	2.21	13902	1343	103	22	GFI1, MGA, PRDM16, HNRNPA2B1, AKIRIN2, CGGBP1, VGLL4, MAX, HMGB2, NCK2, SQSTM1, TIPARP, CBX7, KDM2A, IRF1, ZBTB7B, ZFP36L1, POLR2G, KLF10, ATF7IP, SMAD7, H3F3B
GO:0051348	negative regulation of transferase activity	0.000325	3.48812	4.65	13902	232	103	8	HSPB1, AKT1S1, CBLB, RGS3, CASP3, SMAD7, CDKN2D, PRDX3
GO:0007050	cell cycle arrest	0.000358	3.44612	6.38	13902	127	103	6	IRF1, RASSF1, RRAGA, RPRM, TBRG4, CDKN2D
GO:0008219	cell death	0.000376	3.42481	2.85	13902	664	103	14	ARL6IP1, DDIT4, APLP1, MAX, SQSTM1, CDKN2D, IRF1, RRAGA, ZFP36L1, POLR2G, AVEN, CASP3, PRDX3, STK4
GO:0042326	negative regulation of phosphorylation	0.000489	3.31069	3.57	13902	378	103	10	HSPB1, DDIT4, AKT1S1, CBLB, RGS3, NCK2, CASP3, SMAD7, CDKN2D, PRDX3
GO:0045600	positive regulation of fat cell differentiation	0.000504	3.29757	10.8	13902	50	103	4	PRDM16, ZBTB7B, ZFP36L1, STK4
GO:0033137	negative regulation of peptidyl-serine phosphorylation	0.000549	3.26043	18.41	13902	22	103	3	DDIT4, NCK2, SMAD7
GO:0038179	neurotrophin signaling pathway	0.000628	3.20204	17.6	13902	23	103	3	DDIT4, AKT1S1, CASP3
GO:0000122	negative regulation of transcription by RNA polymerase II	0.000663	3.17849	2.69	13902	703	103	14	GFI1, MGA, PRDM16, HNRNPA2B1, AKIRIN2, CGGBP1, MAX, NCK2, SQSTM1, CBX7, ZBTB7B, KLF10, ATF7IP, SMAD7
GO:0045786	negative regulation of cell cycle	0.000761	3.11862	3.13	13902	474	103	11	IRF1, MGA, RASSF1, PRKACB, RRAGA, RPRM, ZFP36L1, TBRG4, CASP3, MAX, CDKN2D
GO:0035019	somatic stem cell population maintenance	0.000777	3.10958	9.64	13902	56	103	4	PRDM16, POLR2G, KLF10, POLR2A
GO:1903311	regulation of mRNA metabolic process	0.000821	3.08566	4.04	13902	267	103	8	HSPB1, HNRNPA2B1, YTHDC1, ZFP36L1, TBRG4, POLR2G, CPSF6, SNRPA
GO:0033673	negative regulation of kinase activity	0.000999	3.00043	4.46	13902	212	103	7	HSPB1, AKT1S1, CBLB, RGS3, CASP3, CDKN2D, PRDX3
Enrichment is defined as follows:
Enrichment = (No. of genes in intersection/No. of input genes analyzed) / (No. of genes associated with GO term/Total No. of genes)
P-value is the enrichment p-value computed according to the mHG or HG model. This p-value is not corrected for multiple testing of 15032 GO terms.
Gorilla: Gene Ontology enRIchment anaLysis and visuaLizAtion tool
Eran Eden, Roy Navon, Israel Steinfeld, Doron Lipson and Zohar Yakhini. Gorilla: A tool for discovery and visualization of enriched GO terms in ranked gene lists, BMC Bioinformatics 2009, 10:48
Eran Eden, Doron Lipson, Silvan Yogev, Zohar Yakhini. Discovering motifs in ranked lists of DNA sequences, PLoS Computational Biology, 3(3):e39, 2007

## Sheet: enrichment_don't_use_miR-16 BS
GO Term	Description	P-value	-LOG(P-value)	Enrichment	Total No. of genes	No. of genes associated with GO term	No. of input genes analyzed	No. of genes in intersection	Genes
GO:0010944	negative regulation of transcription by competitive promoter binding	0.000101	3.99568	128.7	13900	8	27	2	KDM2A, SMAD7
GO:0010801	negative regulation of peptidyl-threonine phosphorylation	0.000376	3.42481	68.64	13900	15	27	2	DDIT4, SMAD7
GO:0006915	apoptotic process	0.000507	3.29499	5.69	13900	543	27	6	DDIT4, RRAGA, AVEN, CHMP3, APLP1, STK4
GO:0033137	negative regulation of peptidyl-serine phosphorylation	0.000819	3.08672	46.8	13900	22	27	2	DDIT4, SMAD7

## Sheet: enrichment_use_miR-16 BS
GO Term	Description	P-value	-LOG(P-value)	Enrichment	Total No. of genes	No. of genes associated with GO term	No. of input genes analyzed	No. of genes in intersection	Genes
GO:0010605	negative regulation of macromolecule metabolic process	1.08e-05	4.96658	2.22	13900	2063	91	30	DDIT4, GFI1, AKT1S1, HMGB2, NCK2, CDYL, SQSTM1, CBX7, ZBTB7B, ZFP36L1, ATF7IP, CASP3, H3F3B, ARL6IP1, CBLB, PRDM16, HNRNPA2B1, AKIRIN2, CGGBP1, VGLL4, MAX, CDKN2D, TIPARP, HSPB1, IRF1, RGS3, POLR2G, KLF10, SMAD7, PRDX3
GO:0051172	negative regulation of nitrogen compound metabolic process	1.56e-05	4.80688	2.27	13900	1881	91	28	GFI1, DDIT4, AKT1S1, HMGB2, NCK2, SQSTM1, CDYL, CBX7, ZBTB7B, ZFP36L1, ATF7IP, CASP3, H3F3B, ARL6IP1, CBLB, PRDM16, HNRNPA2B1, AKIRIN2, CGGBP1, VGLL4, MAX, CDKN2D, HSPB1, IRF1, RGS3, KLF10, SMAD7, PRDX3
GO:0031324	negative regulation of cellular metabolic process	1.7e-05	4.76955	2.22	13900	1999	91	29	DDIT4, GFI1, AKT1S1, HMGB2, NCK2, SQSTM1, CDYL, CBX7, RRAGA, ZBTB7B, ZFP36L1, ATF7IP, CASP3, H3F3B, ARL6IP1, CBLB, PRDM16, HNRNPA2B1, AKIRIN2, CGGBP1, VGLL4, MAX, CDKN2D, HSPB1, IRF1, RGS3, KLF10, SMAD7, PRDX3
GO:0009892	negative regulation of metabolic process	2.14e-05	4.66959	2.11	13900	2248	91	31	DDIT4, GFI1, AKT1S1, HMGB2, NCK2, CDYL, SQSTM1, CBX7, RRAGA, ZBTB7B, ZFP36L1, ATF7IP, CASP3, H3F3B, ARL6IP1, CBLB, PRDM16, HNRNPA2B1, AKIRIN2, CGGBP1, VGLL4, MAX, CDKN2D, TIPARP, HSPB1, IRF1, RGS3, POLR2G, KLF10, SMAD7, PRDX3
GO:1903507	negative regulation of nucleic acid-templated transcription	5.41e-05	4.2668	2.81	13900	979	91	18	GFI1, PRDM16, HNRNPA2B1, AKIRIN2, CGGBP1, VGLL4, HMGB2, NCK2, MAX, SQSTM1, CDYL, CBX7, IRF1, ZBTB7B, KLF10, ATF7IP, SMAD7, H3F3B
GO:1902679	negative regulation of RNA biosynthetic process	5.56e-05	4.25493	2.8	13900	981	91	18	GFI1, PRDM16, HNRNPA2B1, AKIRIN2, CGGBP1, VGLL4, HMGB2, NCK2, MAX, SQSTM1, CDYL, CBX7, IRF1, ZBTB7B, KLF10, ATF7IP, SMAD7, H3F3B
GO:0006397	mRNA processing	7.45e-05	4.12784	4.49	13900	340	91	10	HNRNPA3, GTF2H5, HNRNPA2B1, ZFP36L1, TBRG4, POLR2G, CPSF6, SNRPA, SNIP1, POLR2A
GO:0031327	negative regulation of cellular biosynthetic process	8.68e-05	4.06148	2.52	13900	1210	91	20	GFI1, DDIT4, PRDM16, HNRNPA2B1, AKIRIN2, CGGBP1, VGLL4, MAX, HMGB2, NCK2, CDYL, SQSTM1, CBX7, IRF1, ZBTB7B, ZFP36L1, KLF10, ATF7IP, SMAD7, H3F3B
GO:0009890	negative regulation of biosynthetic process	0.00011	3.95861	2.48	13900	1231	91	20	GFI1, DDIT4, PRDM16, HNRNPA2B1, AKIRIN2, CGGBP1, VGLL4, MAX, HMGB2, NCK2, CDYL, SQSTM1, CBX7, IRF1, ZBTB7B, ZFP36L1, KLF10, ATF7IP, SMAD7, H3F3B
GO:0045892	negative regulation of transcription, DNA-templated	0.000119	3.92445	2.74	13900	946	91	17	GFI1, PRDM16, HNRNPA2B1, AKIRIN2, CGGBP1, VGLL4, HMGB2, NCK2, MAX, SQSTM1, CBX7, IRF1, ZBTB7B, KLF10, ATF7IP, SMAD7, H3F3B
GO:0051253	negative regulation of RNA metabolic process	0.00013	3.88606	2.62	13900	1048	91	18	GFI1, PRDM16, HNRNPA2B1, AKIRIN2, CGGBP1, VGLL4, HMGB2, NCK2, MAX, SQSTM1, CDYL, CBX7, IRF1, ZBTB7B, KLF10, ATF7IP, SMAD7, H3F3B
GO:0051348	negative regulation of transferase activity	0.000138	3.86012	5.27	13900	232	91	8	HSPB1, AKT1S1, CBLB, RGS3, CASP3, SMAD7, CDKN2D, PRDX3
GO:0080090	regulation of primary metabolic process	0.00014	3.85387	1.56	13900	4690	91	48	DDIT4, GFI1, AKT1S1, PRKACB, YTHDC1, NCK2, HMGB2, CDYL, SQSTM1, SNRPA, MYH9, CBX7, GTF2H5, ISCU, ZBTB7B, ZFP36L1, ATF7IP, CASP3, H3F3B, SNIP1, ARL6IP1, NCOA6, CBLB, PRDM16, RAB7A, HNRNPA2B1, MID1IP1, AKIRIN2, CGGBP1, CPSF6, VGLL4, MAX, CDKN2D, TIPARP, HSPB1, CSNK1D, IRF1, NGDN, RGS3, TBRG4, POLR2G, KLF10, SH2B1, IER5, SMAD7, STK4, PRDX3, POLR2A
GO:0048519	negative regulation of biological process	0.000141	3.85078	1.62	13900	4138	91	44	DDIT4, GFI1, AKT1S1, RASSF1, PRKACB, RPRM, NCK2, HMGB2, CDYL, SQSTM1, MYH9, IP6K2, CBX7, ISCU, RRAGA, ZBTB7B, ZFP36L1, AVEN, ATF7IP, CASP3, H3F3B, BRAP, ARL6IP1, CBLB, PRDM16, RAB7A, HNRNPA2B1, MID1IP1, AKIRIN2, CGGBP1, VGLL4, MAX, CDKN2D, TIPARP, HSPB1, TRIOBP, IRF1, RGS3, TBRG4, POLR2G, KLF10, SMAD7, STK4, PRDX3
GO:0051171	regulation of nitrogen compound metabolic process	0.000147	3.83268	1.58	13900	4558	91	47	DDIT4, GFI1, AKT1S1, PRKACB, YTHDC1, NCK2, HMGB2, CDYL, SQSTM1, SNRPA, MYH9, CBX7, GTF2H5, ISCU, ZBTB7B, ZFP36L1, ATF7IP, CASP3, H3F3B, SNIP1, ARL6IP1, NCOA6, CBLB, PRDM16, RAB7A, HNRNPA2B1, AKIRIN2, CGGBP1, CPSF6, VGLL4, MAX, CDKN2D, TIPARP, HSPB1, CSNK1D, IRF1, NGDN, RGS3, TBRG4, POLR2G, KLF10, SH2B1, IER5, SMAD7, STK4, PRDX3, POLR2A
GO:0045934	negative regulation of nucleobase-containing compound metabolic process	0.000151	3.82102	2.5	13900	1159	91	19	GFI1, DDIT4, PRDM16, HNRNPA2B1, AKIRIN2, CGGBP1, VGLL4, MAX, HMGB2, NCK2, SQSTM1, CDYL, CBX7, IRF1, ZBTB7B, KLF10, ATF7IP, SMAD7, H3F3B
GO:0048523	negative regulation of cellular process	0.000154	3.81248	1.67	13900	3750	91	41	DDIT4, GFI1, AKT1S1, RASSF1, PRKACB, RPRM, NCK2, HMGB2, CDYL, SQSTM1, MYH9, IP6K2, CBX7, RRAGA, ZBTB7B, ZFP36L1, AVEN, ATF7IP, CASP3, H3F3B, BRAP, ARL6IP1, CBLB, PRDM16, RAB7A, HNRNPA2B1, MID1IP1, AKIRIN2, CGGBP1, VGLL4, MAX, CDKN2D, HSPB1, TRIOBP, IRF1, RGS3, TBRG4, KLF10, SMAD7, STK4, PRDX3
GO:0010558	negative regulation of macromolecule biosynthetic process	0.000156	3.80688	2.5	13900	1162	91	19	GFI1, PRDM16, HNRNPA2B1, AKIRIN2, CGGBP1, VGLL4, MAX, HMGB2, NCK2, SQSTM1, CDYL, CBX7, IRF1, ZBTB7B, ZFP36L1, KLF10, ATF7IP, SMAD7, H3F3B
GO:0048011	neurotrophin TRK receptor signaling pathway	0.000173	3.76195	26.96	13900	17	91	3	DDIT4, AKT1S1, CASP3
GO:0042326	negative regulation of phosphorylation	0.000178	3.74958	4.04	13900	378	91	10	HSPB1, DDIT4, AKT1S1, CBLB, RGS3, NCK2, CASP3, SMAD7, CDKN2D, PRDX3
GO:0019222	regulation of metabolic process	0.000182	3.73993	1.51	13900	5164	91	51	GFI1, AKT1S1, PRKACB, HMGB2, CDYL, ZFP36L1, ATF7IP, CASP3, RAB7A, CPSF6, CGGBP1, MAX, RGS3, TBRG4, IER5, PRDX3, STK4, DDIT4, SUCO, COX17, YTHDC1, NCK2, MYH9, SNRPA, SQSTM1,CBX7, ISCU, GTF2H5, RRAGA, ZBTB7B, H3F3B, SNIP1, ARL6IP1, NCOA6, CBLB, PRDM16, HNRNPA2B1, AKIRIN2, MID1IP1, VGLL4, CDKN2D, HSPB1, TIPARP, IRF1, CSNK1D, NGDN, POLR2G, KLF10, SH2B1, SMAD7, POLR2A
GO:0007050	cell cycle arrest	0.000183	3.73755	7.22	13900	127	91	6	IRF1, RASSF1, RRAGA, RPRM, TBRG4, CDKN2D
GO:0006915	apoptotic process	0.000215	3.66756	3.37	13900	544	91	12	ARL6IP1, DDIT4, IRF1, RRAGA, ZFP36L1, AVEN, POLR2G, CASP3, MAX, SQSTM1, STK4, PRDX3
GO:0012501	programmed cell death	0.000236	3.62709	3.13	13900	634	91	13	ARL6IP1, DDIT4, MAX, SQSTM1, CDKN2D, IRF1, RRAGA, ZFP36L1, POLR2G, AVEN, CASP3, PRDX3, STK4
GO:2000113	negative regulation of cellular macromolecule biosynthetic process	0.000254	3.59517	2.49	13900	1106	91	18	GFI1, PRDM16, HNRNPA2B1, AKIRIN2, CGGBP1, VGLL4, HMGB2, NCK2, MAX, SQSTM1, CBX7, IRF1, ZBTB7B, ZFP36L1, KLF10, ATF7IP, SMAD7, H3F3B
GO:0031323	regulation of cellular metabolic process	0.000262	3.5817	1.53	13900	4800	91	48	DDIT4, GFI1, AKT1S1, PRKACB, COX17, YTHDC1, NCK2, HMGB2, CDYL, SQSTM1, SNRPA, MYH9, CBX7, GTF2H5, ISCU, RRAGA, ZBTB7B, ZFP36L1, ATF7IP, CASP3, H3F3B, SNIP1, ARL6IP1, NCOA6, CBLB, PRDM16, HNRNPA2B1, MID1IP1, AKIRIN2, CGGBP1, CPSF6, VGLL4, MAX, CDKN2D, HSPB1, CSNK1D, IRF1, NGDN, RGS3, TBRG4, POLR2G, KLF10, SH2B1, IER5, SMAD7, STK4, PRDX3, POLR2A
GO:0045600	positive regulation of fat cell differentiation	0.000314	3.50307	12.22	13900	50	91	4	PRDM16, ZBTB7B, ZFP36L1, STK4
GO:0010629	negative regulation of gene expression	0.000354	3.451	2.27	13900	1343	91	20	GFI1, PRDM16, HNRNPA2B1, AKIRIN2, CGGBP1, VGLL4, MAX, HMGB2, NCK2, SQSTM1, TIPARP, CBX7, IRF1, ZBTB7B, ZFP36L1, POLR2G, KLF10, ATF7IP, SMAD7, H3F3B
GO:1903311	regulation of mRNA metabolic process	0.000358	3.44612	4.58	13900	267	91	8	HSPB1, HNRNPA2B1, YTHDC1, ZFP36L1, TBRG4, POLR2G, CPSF6, SNRPA
GO:0008219	cell death	0.000369	3.43297	2.99	13900	664	91	13	ARL6IP1, DDIT4, MAX, SQSTM1, CDKN2D, IRF1, RRAGA, ZFP36L1, POLR2G, AVEN, CASP3, PRDX3, STK4
GO:0033137	negative regulation of peptidyl-serine phosphorylation	0.000382	3.41794	20.83	13900	22	91	3	DDIT4, NCK2, SMAD7
GO:0001933	negative regulation of protein phosphorylation	0.000431	3.36552	3.97	13900	346	91	9	HSPB1, DDIT4, AKT1S1, CBLB, RGS3, NCK2, CASP3, SMAD7, CDKN2D
GO:0038179	neurotrophin signaling pathway	0.000437	3.35952	19.92	13900	23	91	3	DDIT4, AKT1S1, CASP3
GO:0033673	negative regulation of kinase activity	0.000476	3.32239	5.04	13900	212	91	7	HSPB1, AKT1S1, CBLB, RGS3, CASP3, CDKN2D, PRDX3
GO:0035019	somatic stem cell population maintenance	0.000487	3.31247	10.91	13900	56	91	4	PRDM16, POLR2G, KLF10, POLR2A
GO:0000122	negative regulation of transcription by RNA polymerase II	0.000634	3.19791	2.82	13900	703	91	13	GFI1, PRDM16, HNRNPA2B1, AKIRIN2, CGGBP1, MAX, NCK2, SQSTM1, CBX7, ZBTB7B, ATF7IP, KLF10, SMAD7
GO:0031440	regulation of mRNA 3'-end processing	0.000709	3.14935	16.97	13900	27	91	3	ZFP36L1, CPSF6, SNRPA
GO:0006370	7-methylguanosine mRNA capping	0.00079	3.10237	16.37	13900	28	91	3	GTF2H5, POLR2G, POLR2A
GO:0060255	regulation of macromolecule metabolic process	0.000845	3.07314	1.48	13900	4736	91	46	DDIT4, GFI1, AKT1S1, PRKACB, YTHDC1, NCK2, HMGB2, CDYL, SQSTM1, SNRPA, MYH9, CBX7, GTF2H5, ZBTB7B, ZFP36L1, ATF7IP, CASP3, H3F3B, SNIP1, ARL6IP1, NCOA6, CBLB, PRDM16, RAB7A, HNRNPA2B1, AKIRIN2, CGGBP1, CPSF6, VGLL4, MAX, CDKN2D, TIPARP, HSPB1, CSNK1D, IRF1, NGDN, RGS3, TBRG4, POLR2G, KLF10, SH2B1, IER5, SMAD7, STK4, PRDX3, POLR2A
GO:0050684	regulation of mRNA processing	0.000867	3.06198	6.76	13900	113	91	5	HNRNPA2B1, YTHDC1, ZFP36L1, CPSF6, SNRPA
GO:0036260	RNA capping	0.000877	3.057	15.8	13900	29	91	3	GTF2H5, POLR2G, POLR2A
GO:0009452	7-methylguanosine RNA capping	0.000877	3.057	15.8	13900	29	91	3	GTF2H5, POLR2G, POLR2A
GO:0045936	negative regulation of phosphate metabolic process	0.000907	3.04239	3.28	13900	465	91	10	HSPB1, DDIT4, AKT1S1, CBLB, RGS3, NCK2, CASP3, CDKN2D, SMAD7, PRDX3
GO:0010563	negative regulation of phosphorus metabolic process	0.000922	3.03527	3.28	13900	466	91	10	HSPB1, DDIT4, AKT1S1, CBLB, RGS3, NCK2, CASP3, CDKN2D, SMAD7, PRDX3
